# Supplementary material for: Solvent- and ligand-induced switch of selectivity in gold(I)-catalyzed tandem reactions of 3-propargylindoles
Source: PubMed Central journal article supplement (PMC3135218; doi:10.3762/bjoc.7.89), 2011-06-09

# Supporting Information

for

## Solvent- and ligand-induced switch of selectivity in gold(I)-catalyzed tandem reactions of 3- propargylindoles

Estela Álvarez<sup>1</sup>, Delia Miguel<sup>1</sup>, Patricia García-García<sup>1</sup>, Manuel A. Fernández-Rodríguez<sup>1</sup>, Félix Rodríguez<sup>2</sup> and Roberto Sanz<sup>\*1</sup>

Address: <sup>1</sup>Área de Química Orgánica, Departamento de Química, Facultad de Ciencias, Universidad de Burgos, Pza. Misael Bañuelos s/n, 09001 Burgos, Spain and <sup>2</sup>Instituto Universitario de Química Organometálica “Enrique Moles”, Universidad de Oviedo, C/Julián Clavería 8, 33006 Oviedo, Spain

Email: Roberto Sanz - [rsd@ubu.es](mailto:rsd@ubu.es)

\*Corresponding author

***NMR spectra***

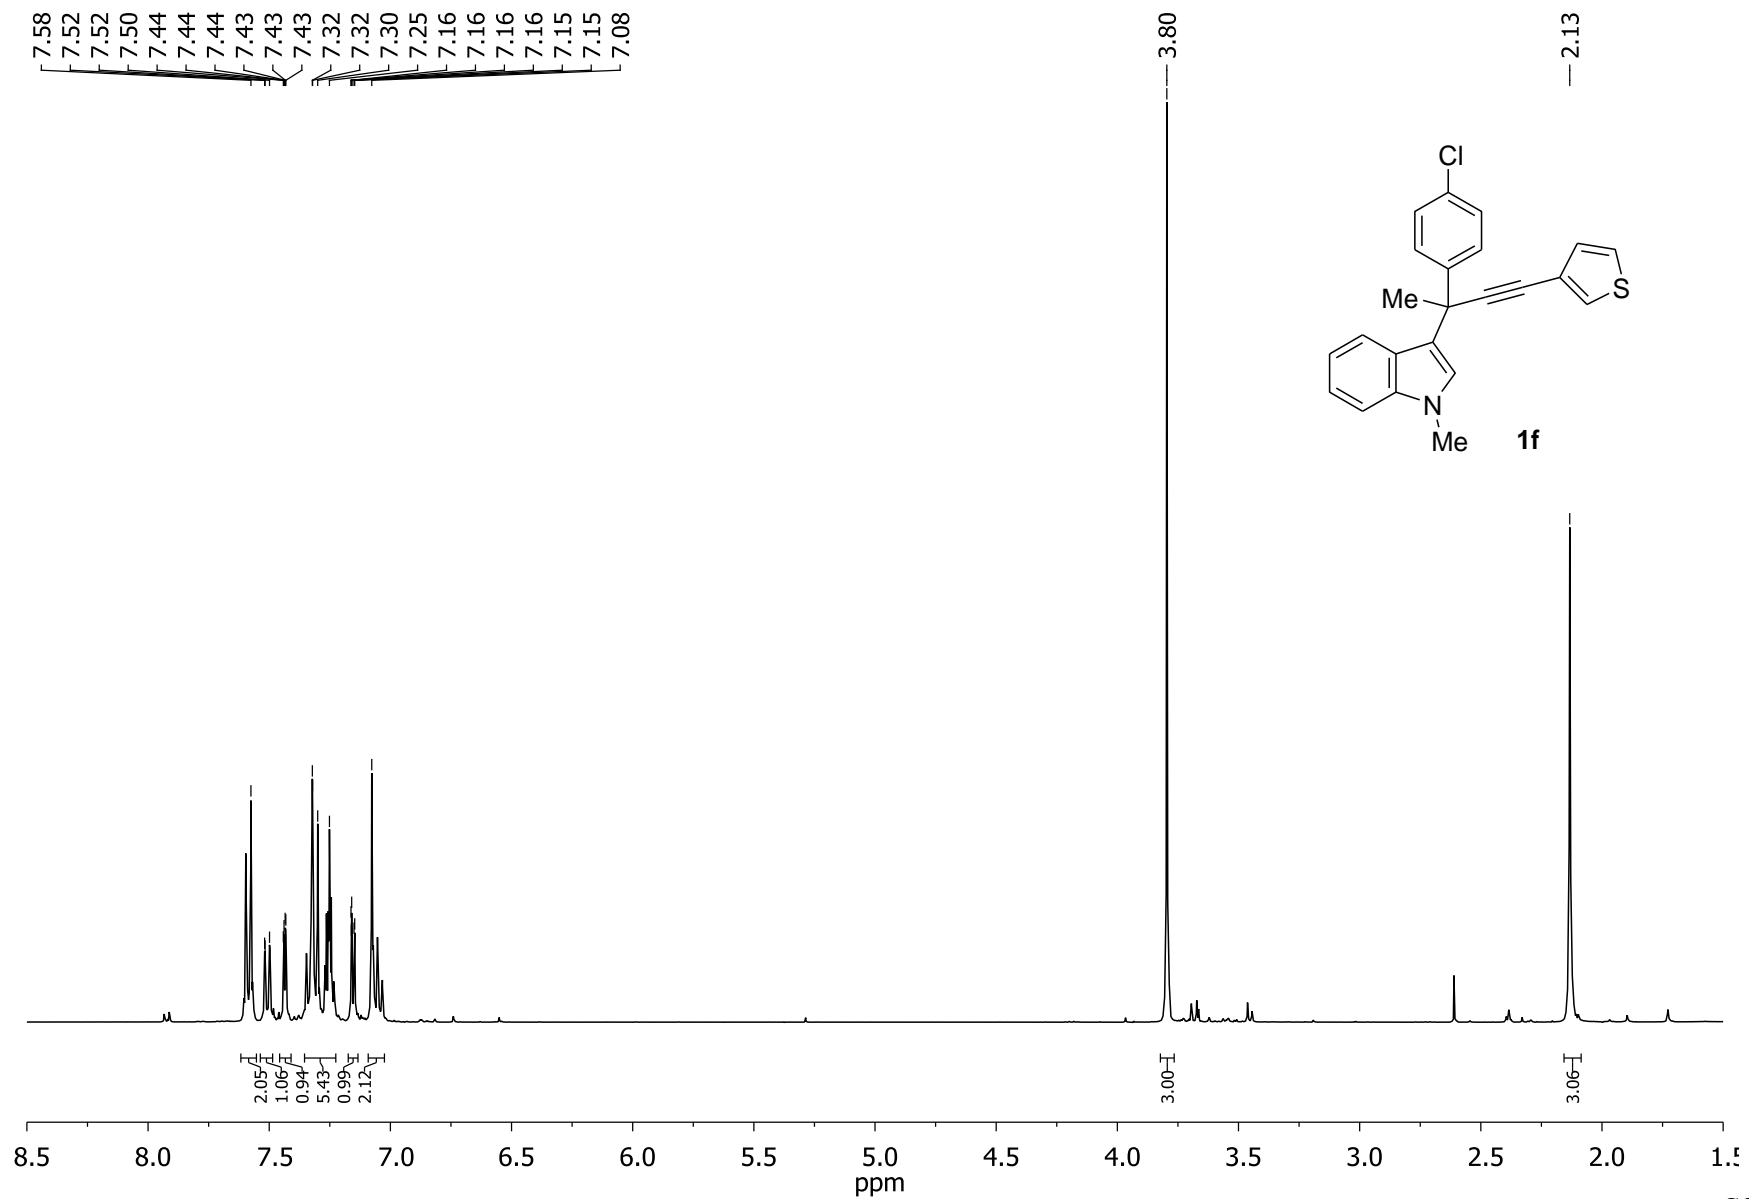

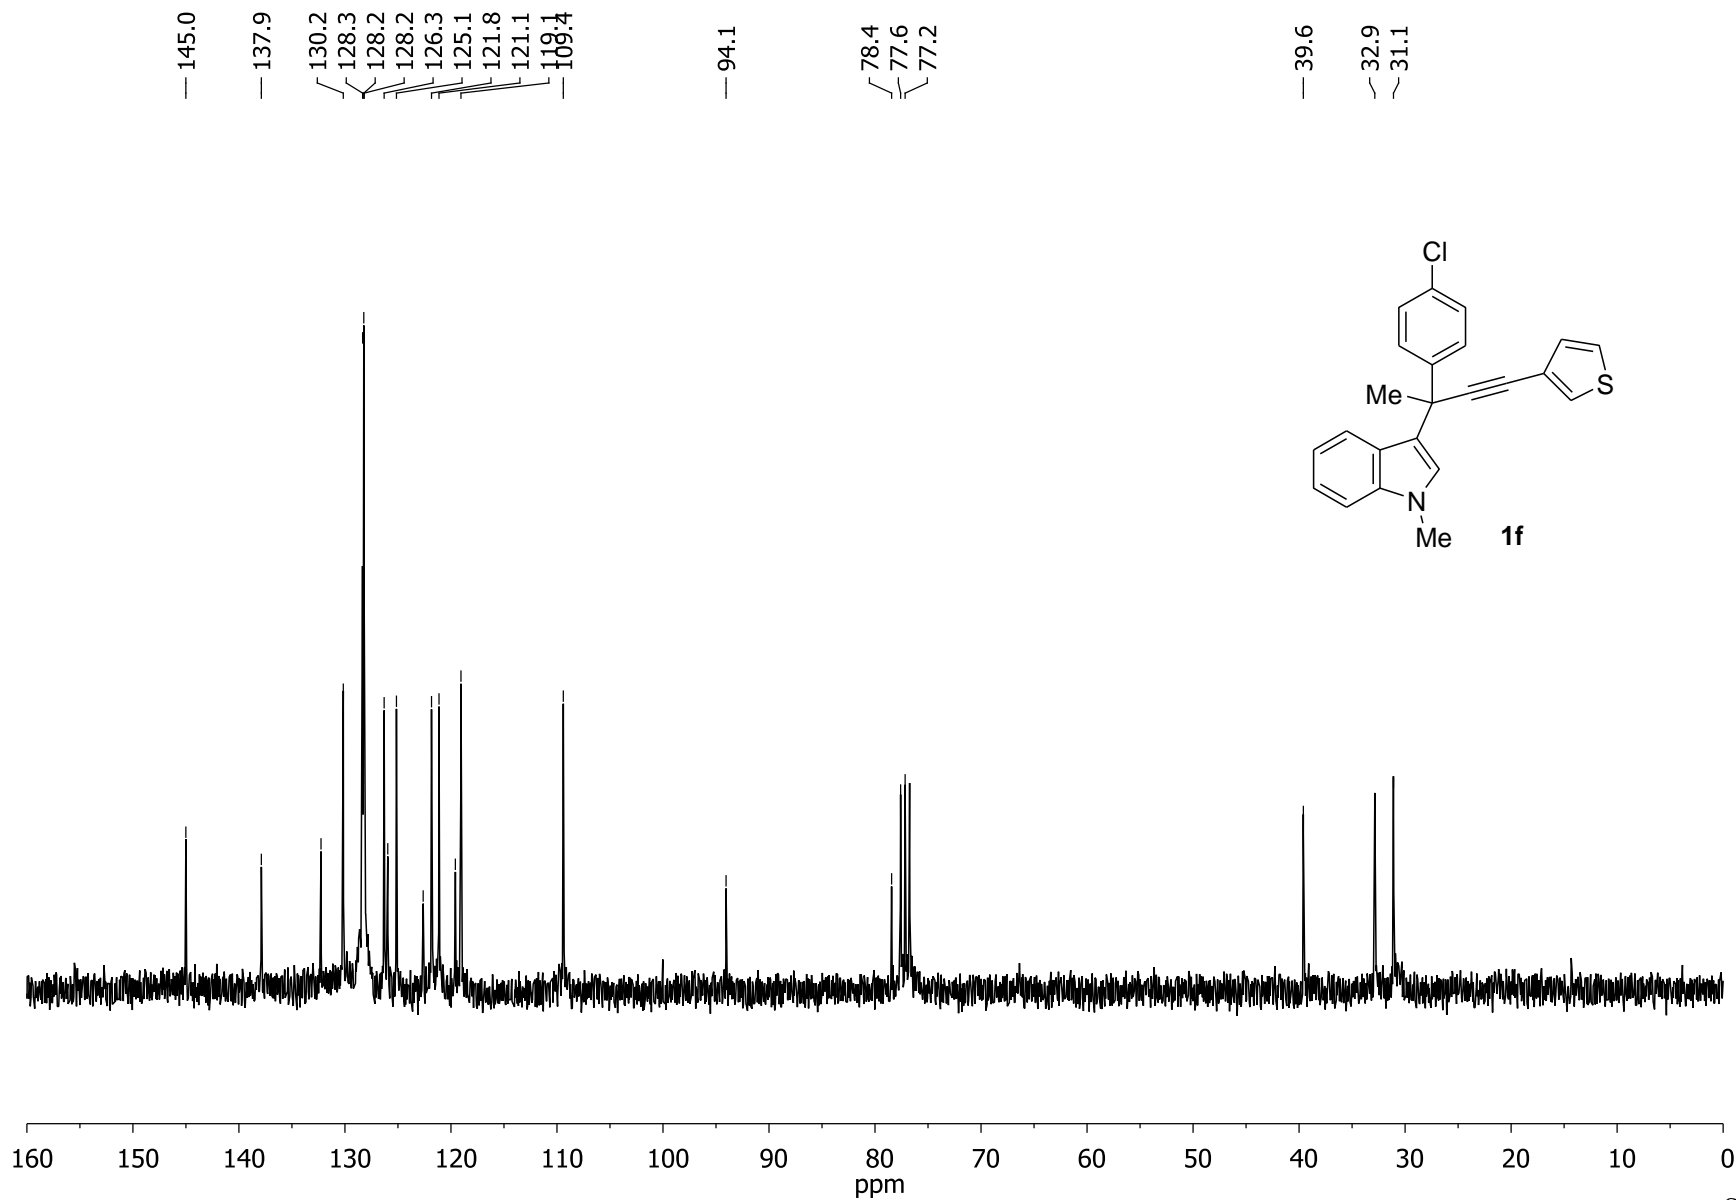

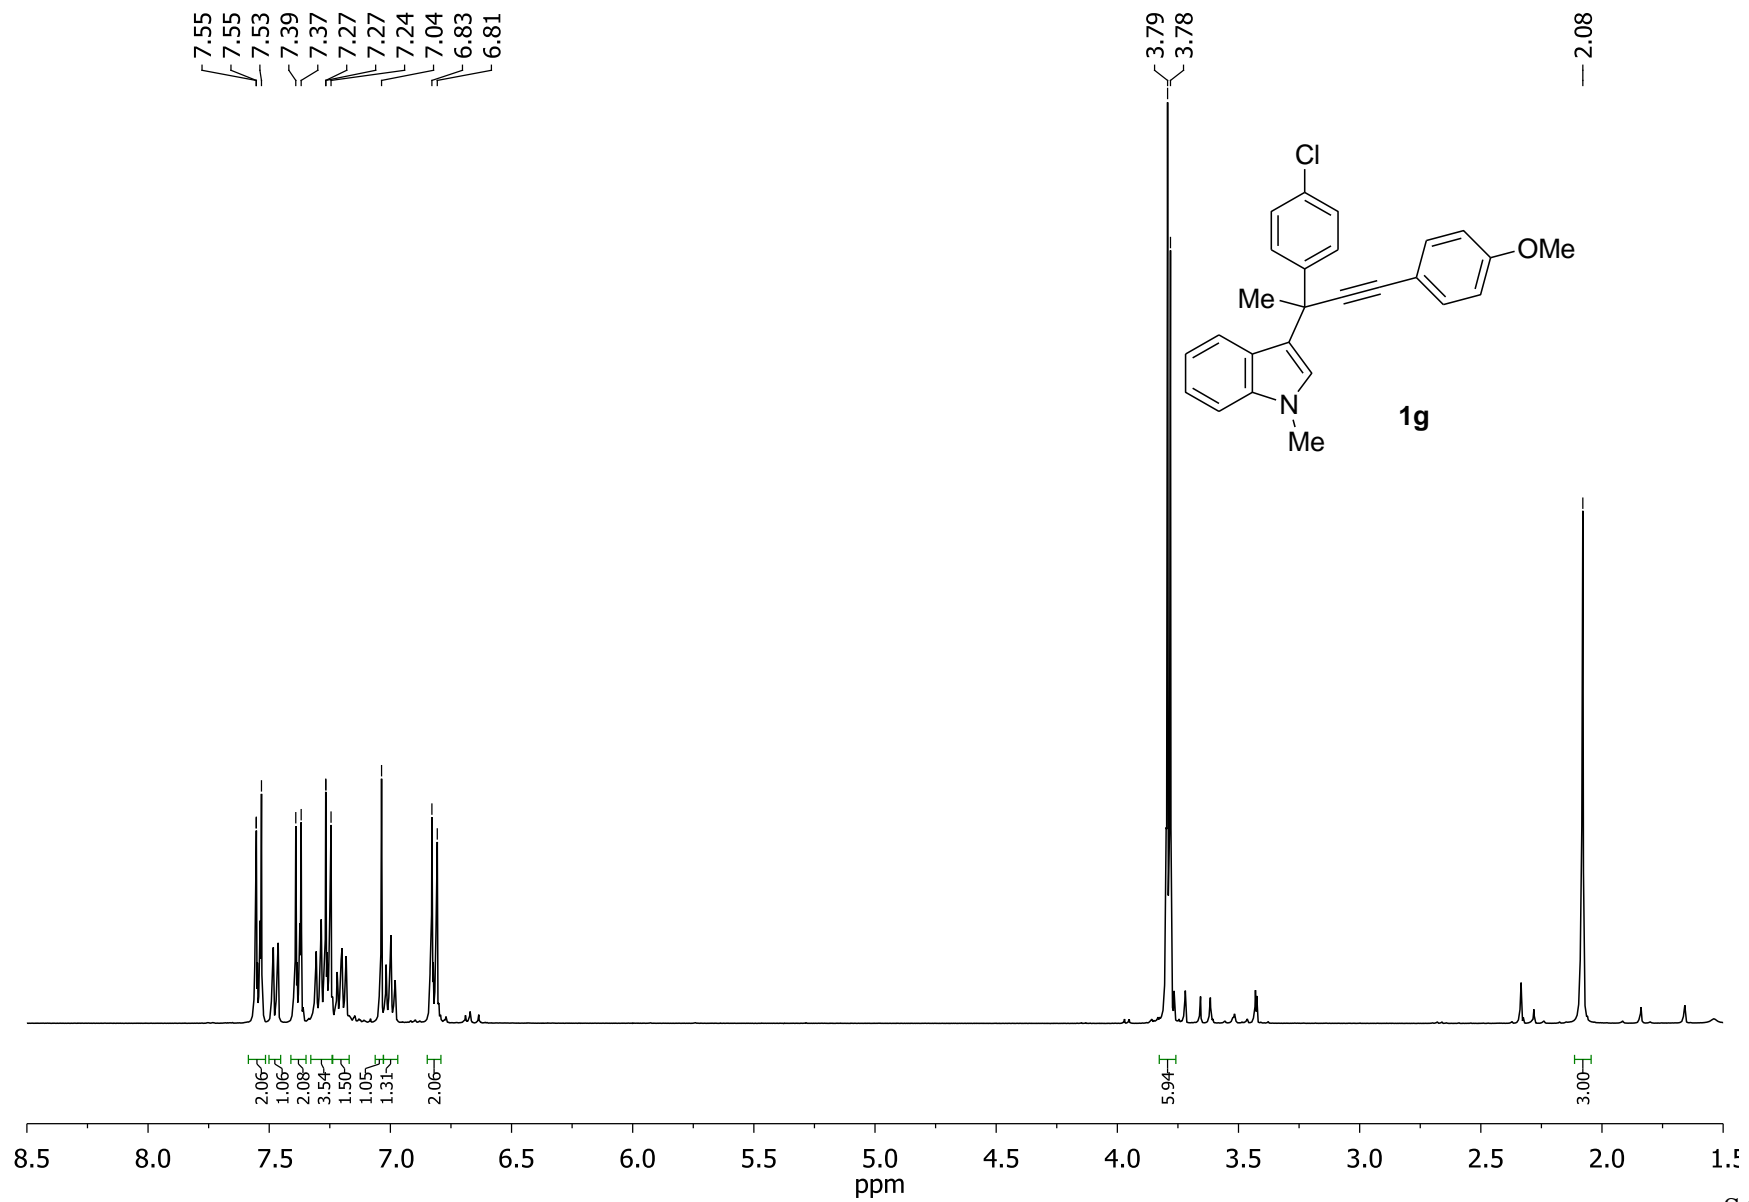

— 159.3  
— 145.3  
/ 137.9  
/ 133.1  
/ 132.1  
/ 128.3  
/ 128.2  
/ 126.2  
/ 126.0  
/ 121.8  
/ 121.2  
/ 119.8  
/ 119.0  
/ 115.8  
/ 113.8  
/ 109.4

— 93.0

— 83.1

— 55.3

— 39.5

~ 32.8

~ 31.2

— 18.5

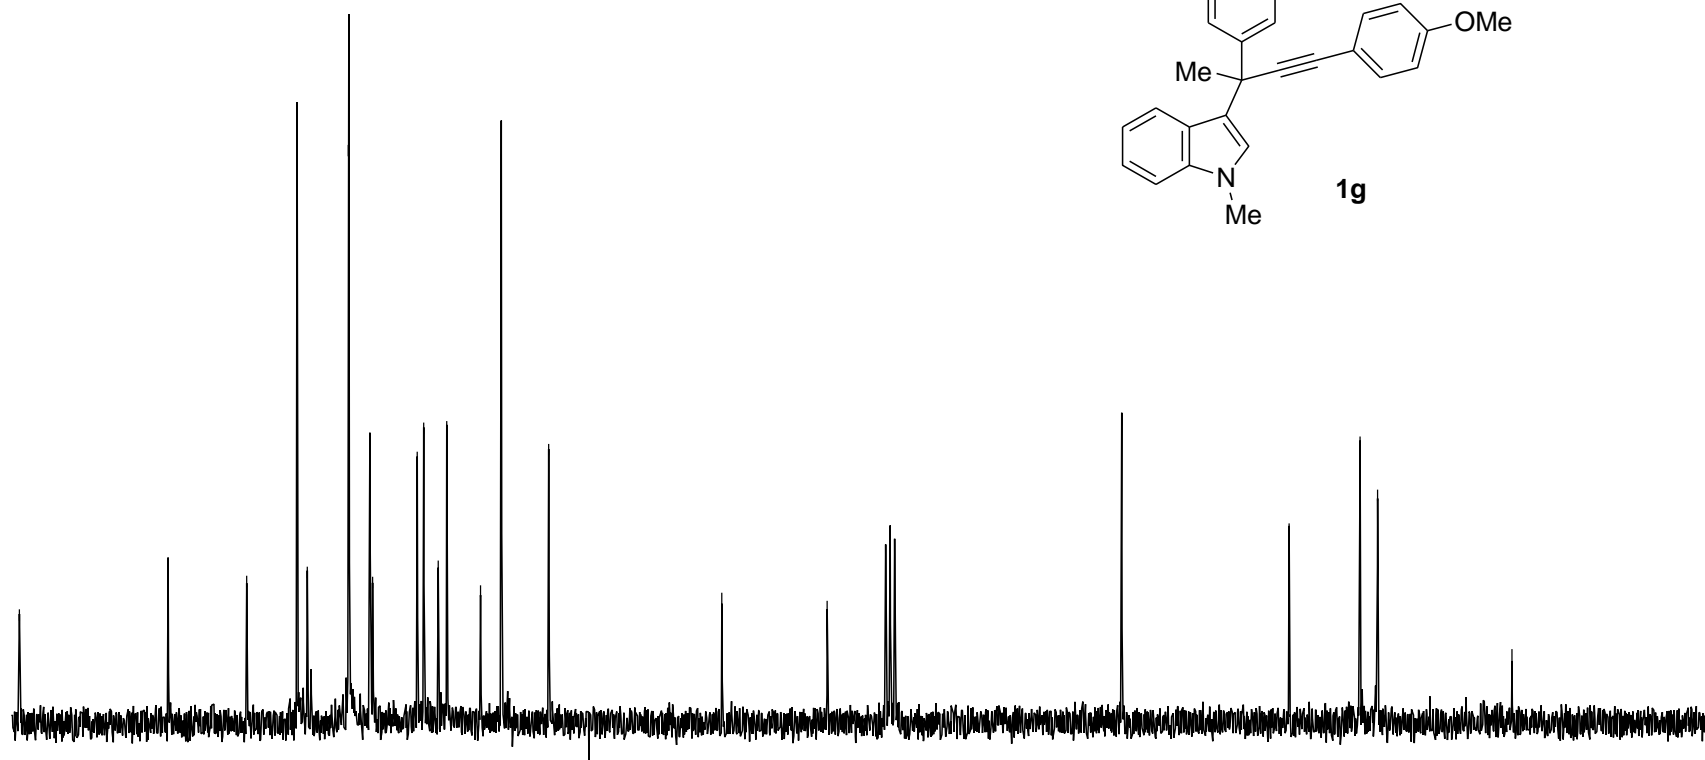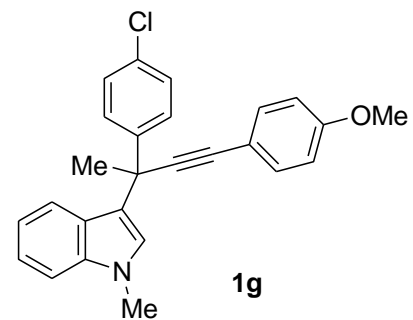

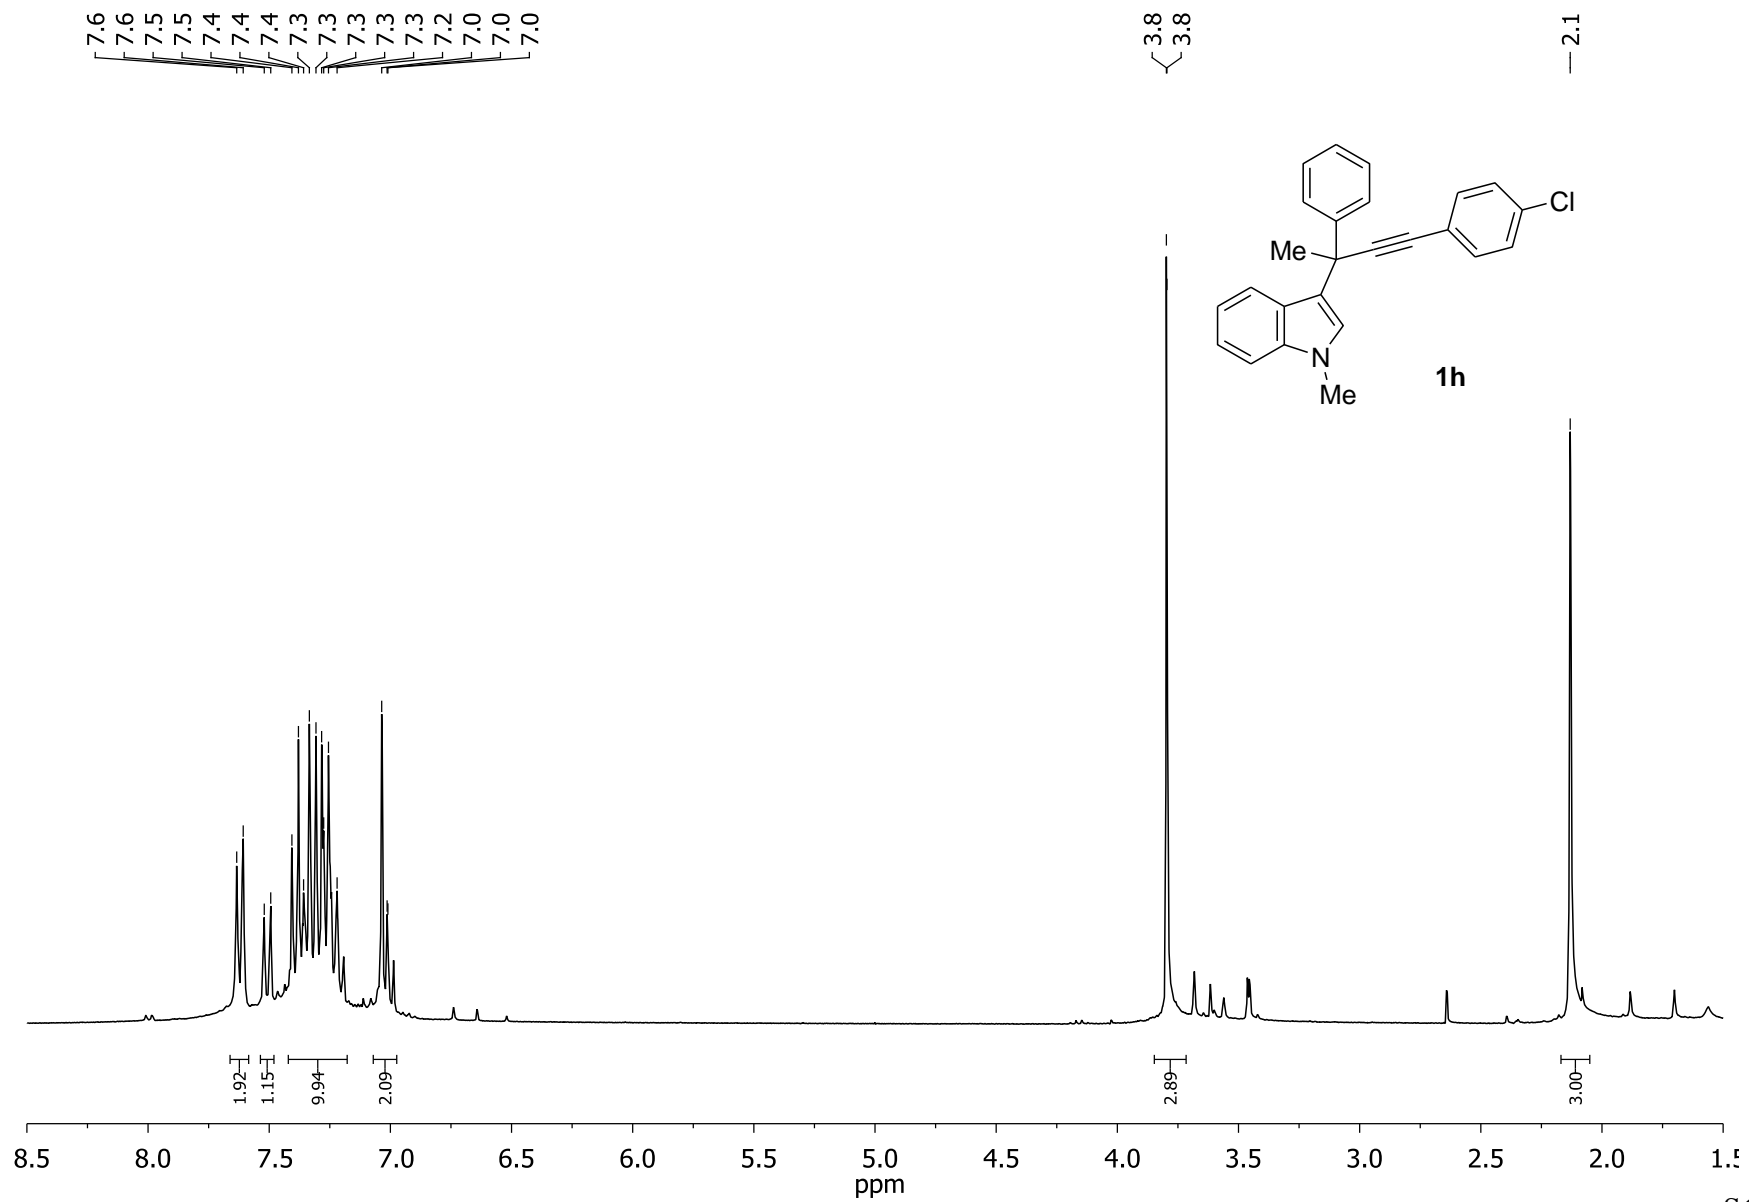

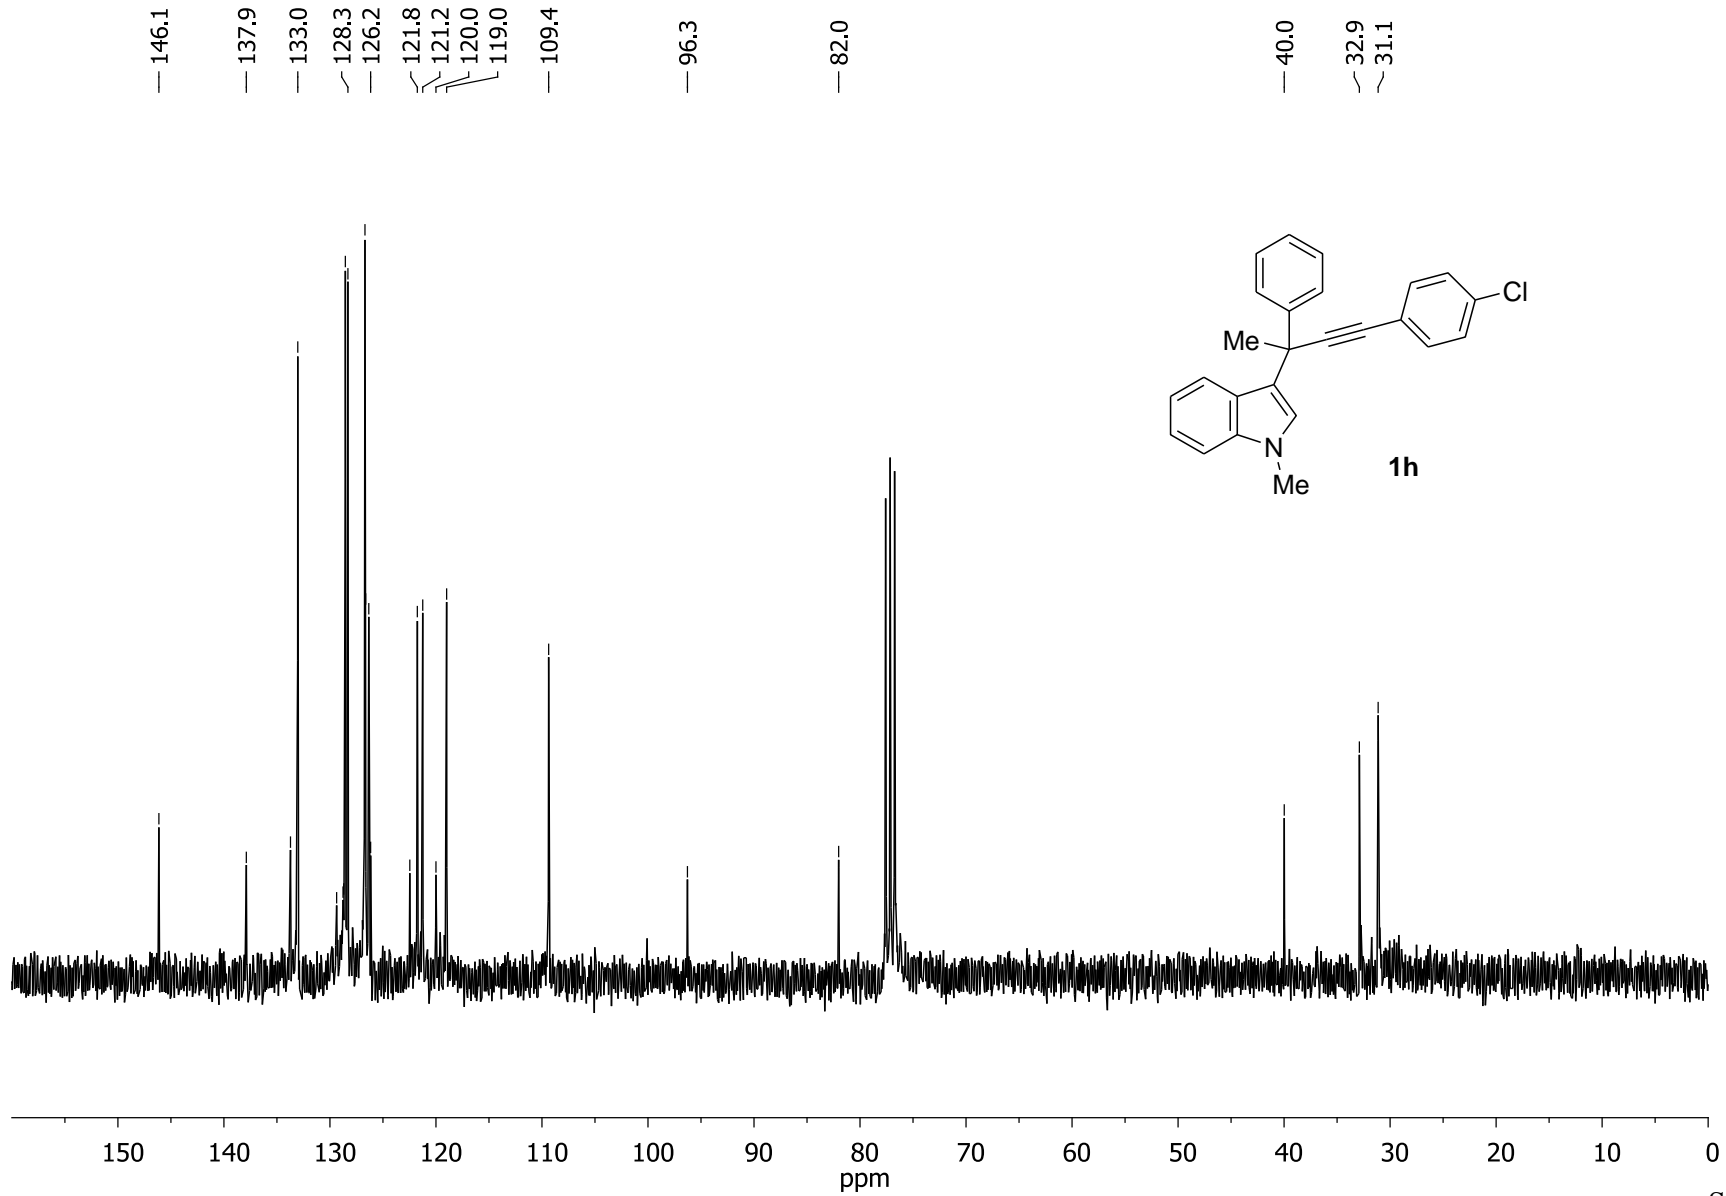

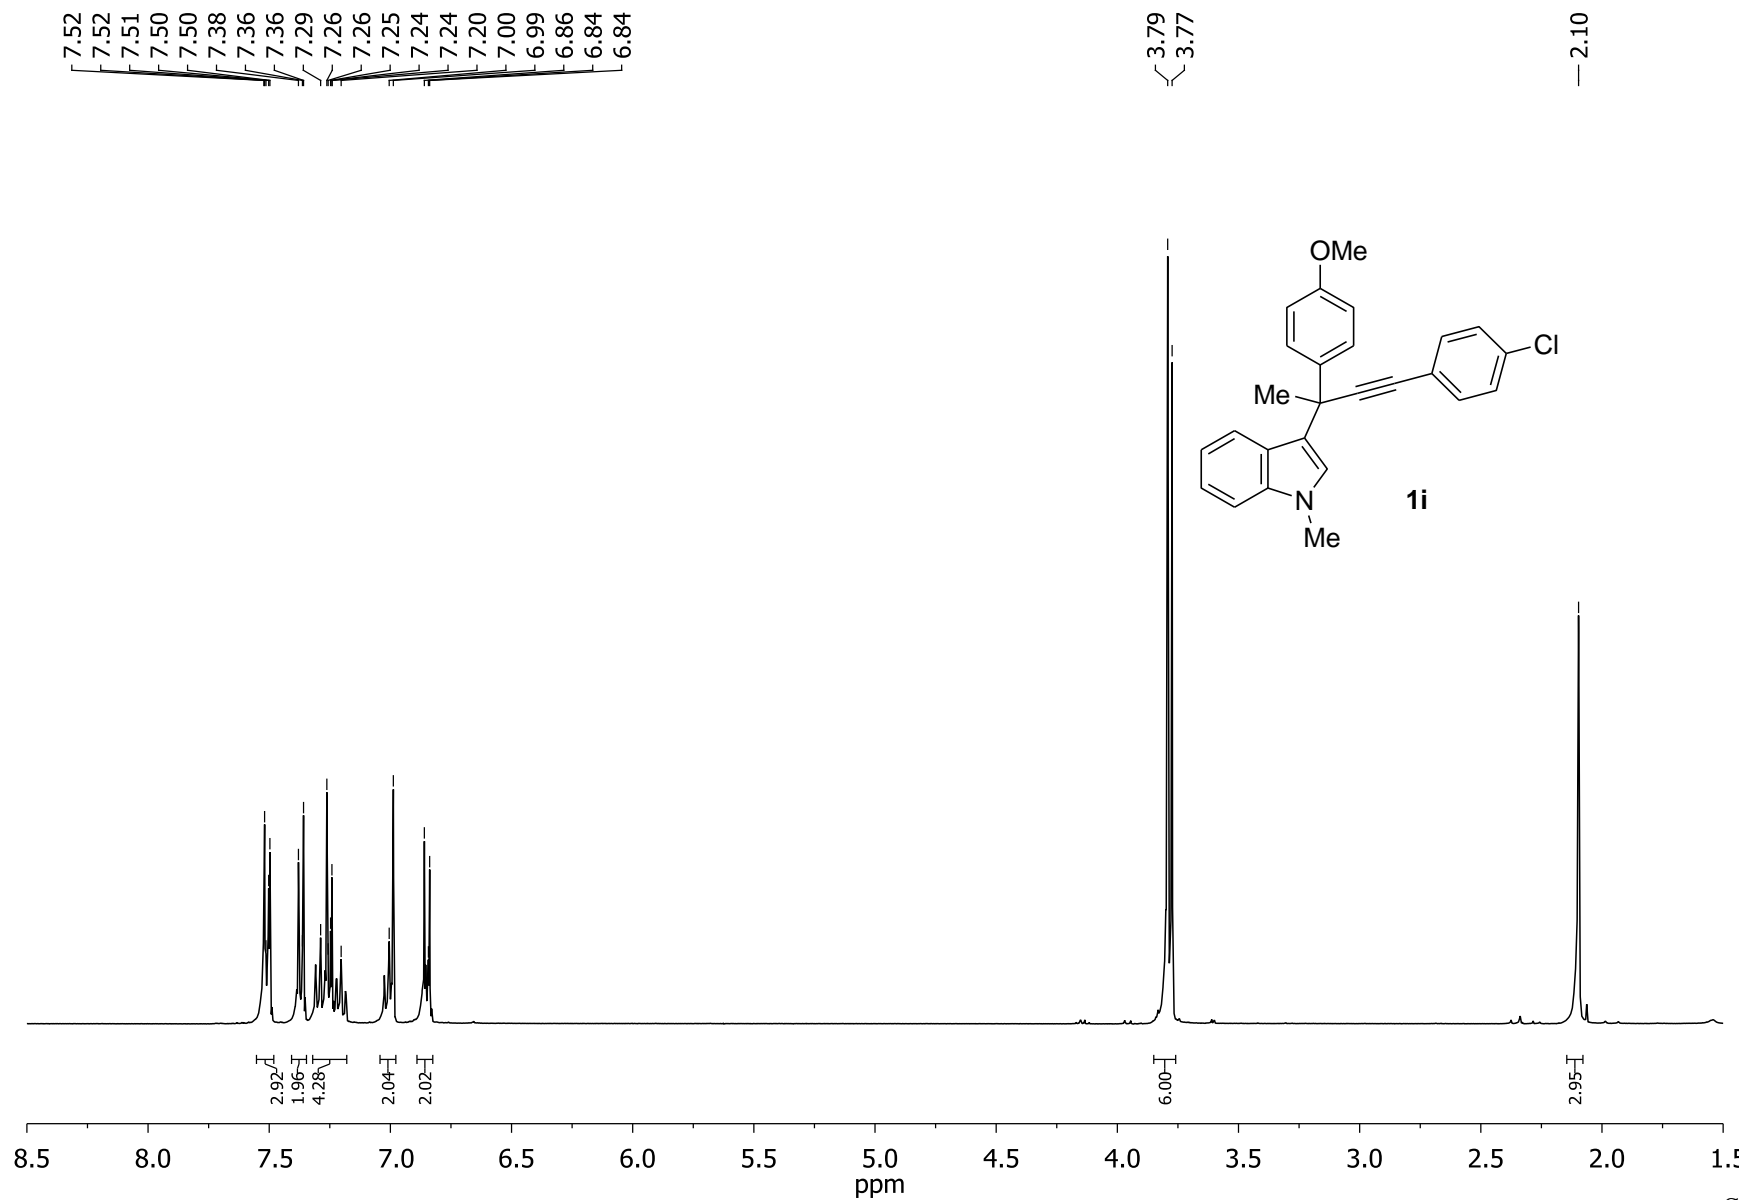



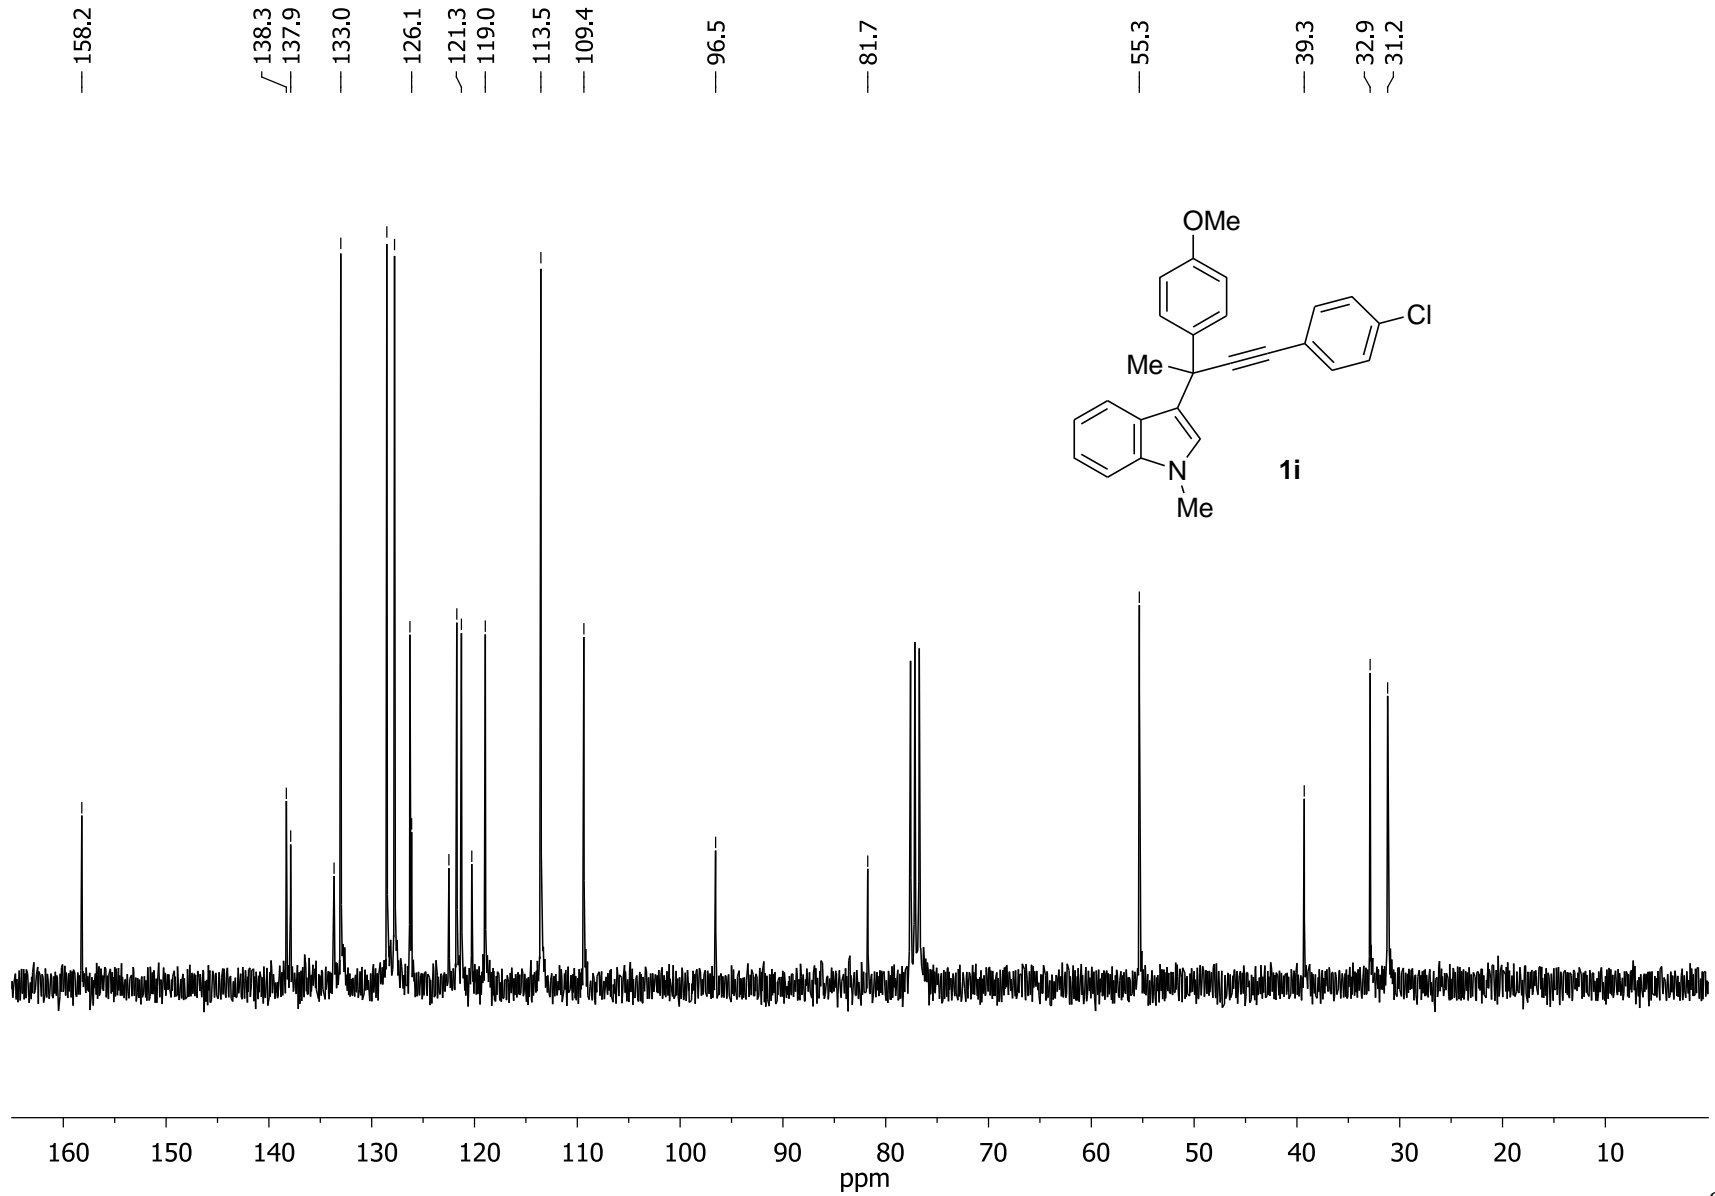

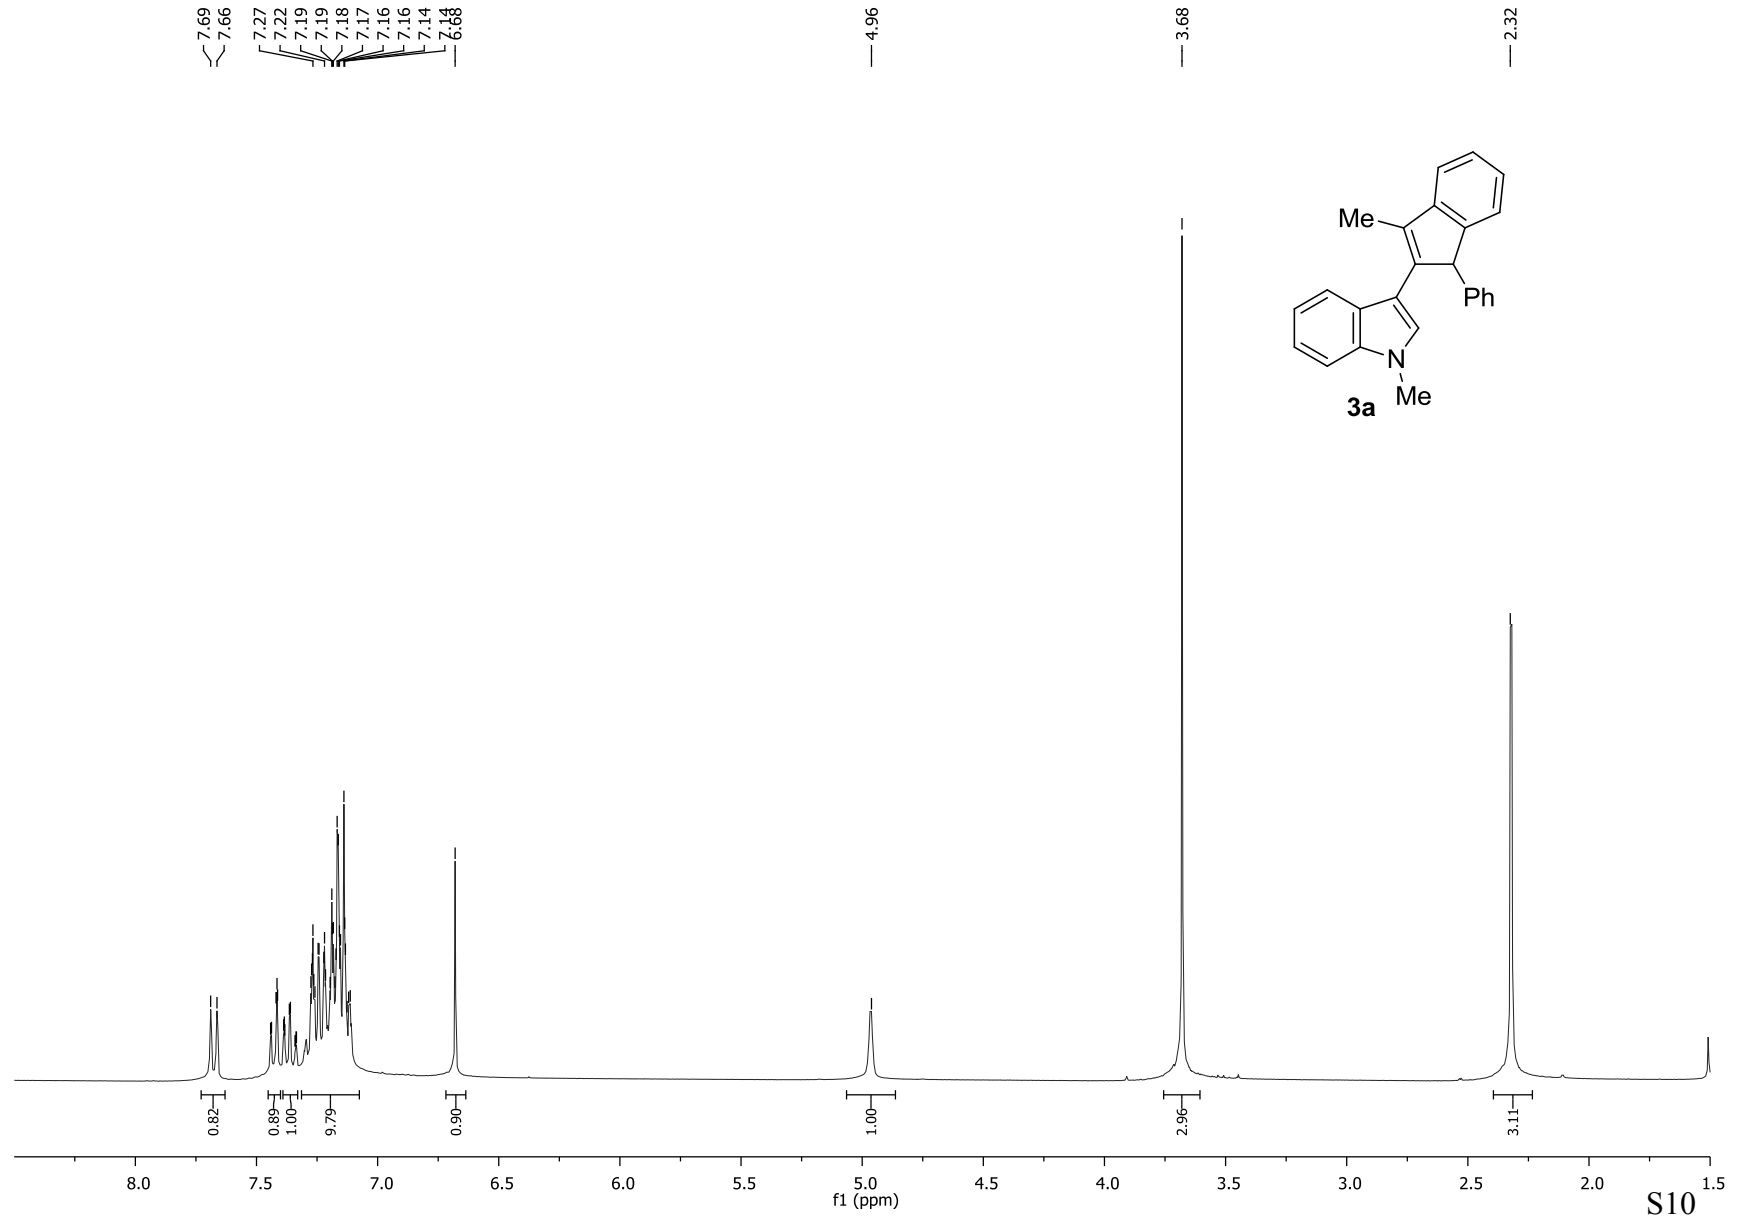

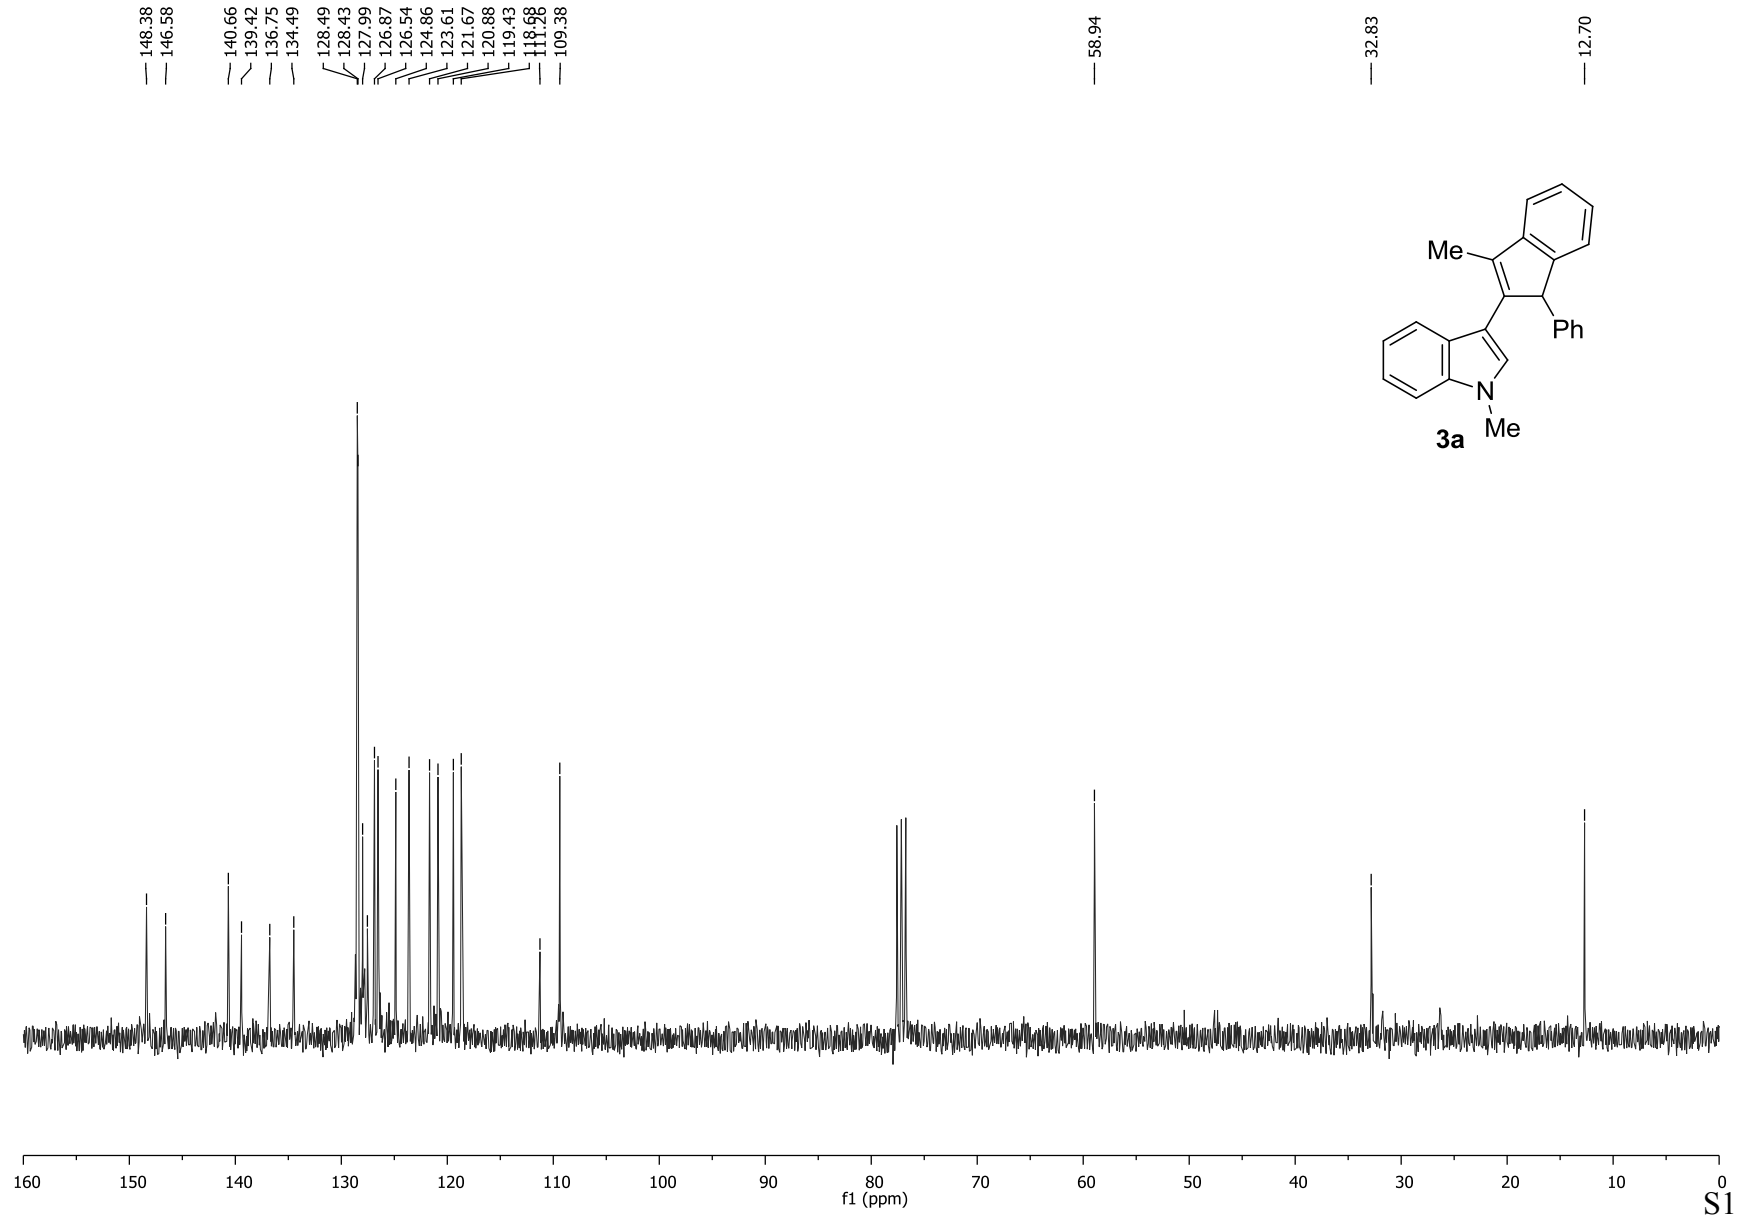

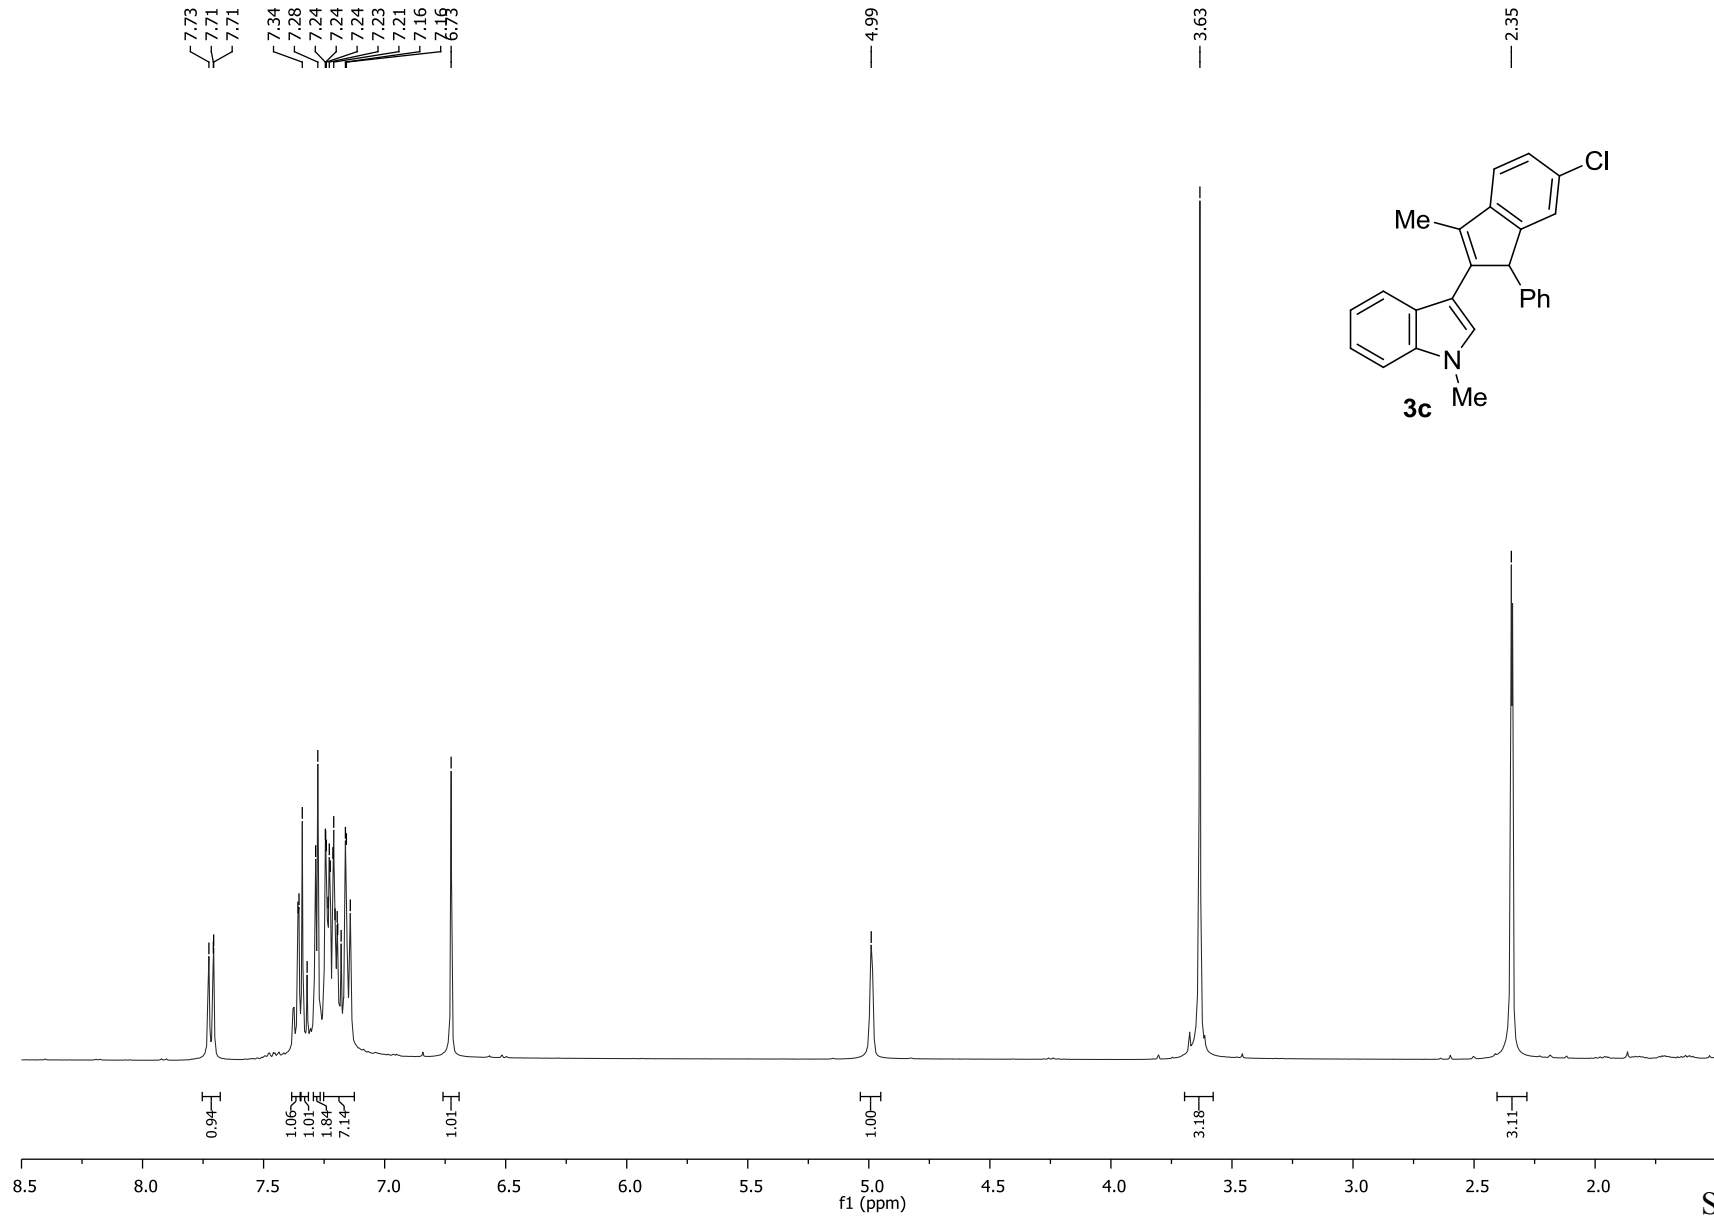

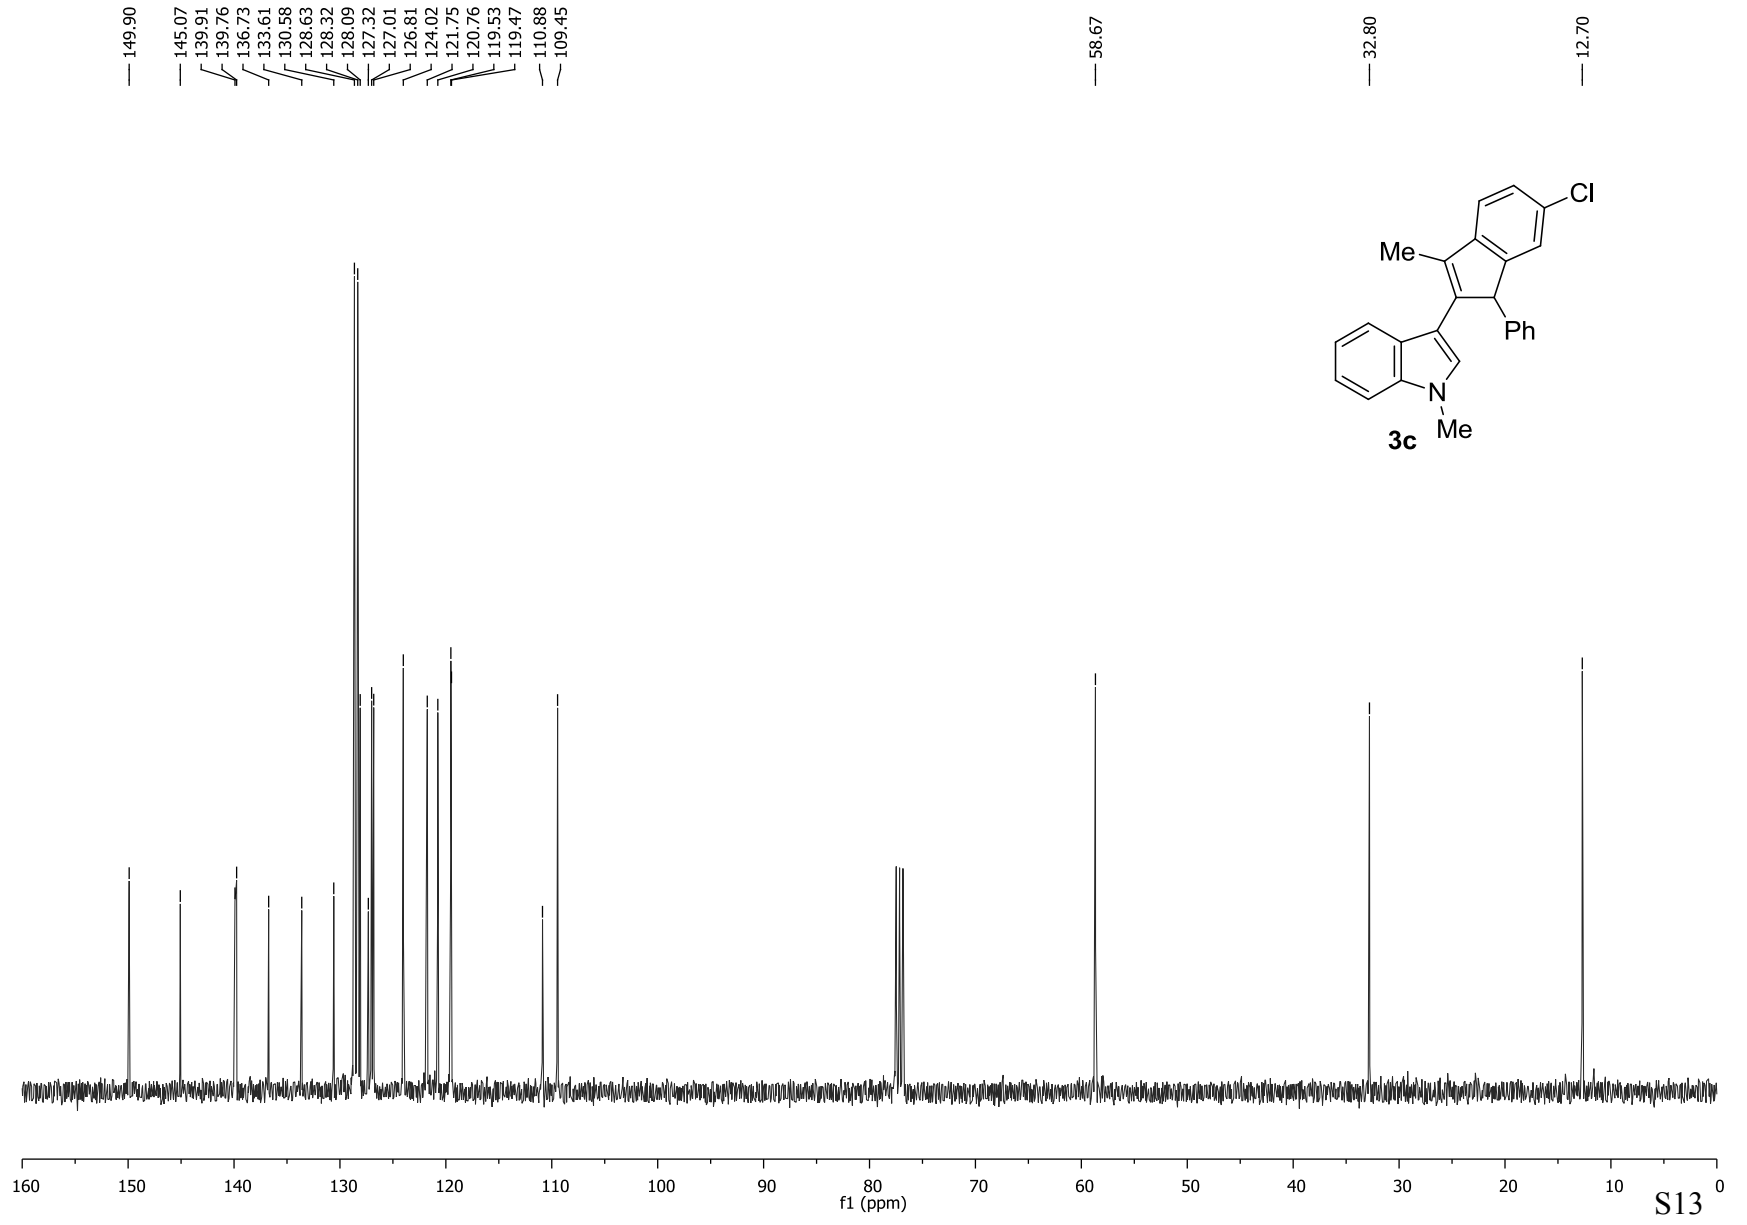

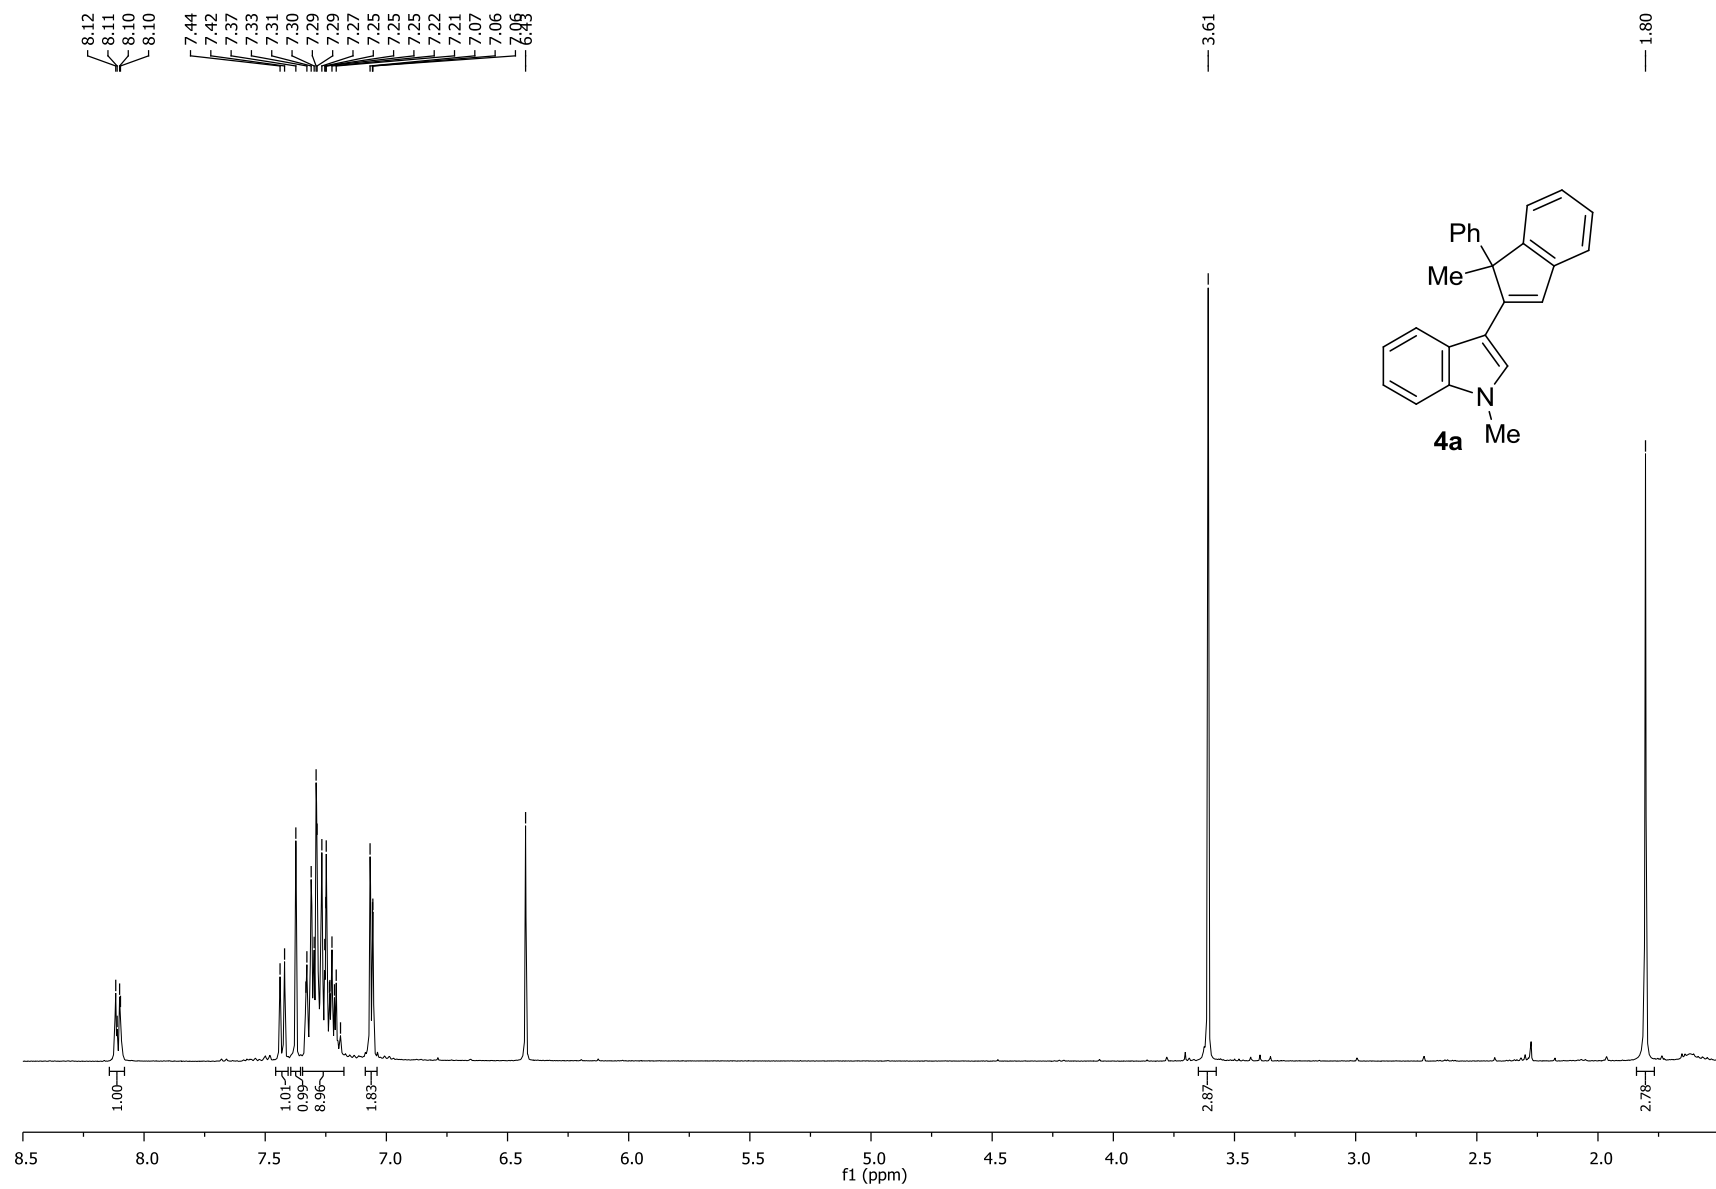

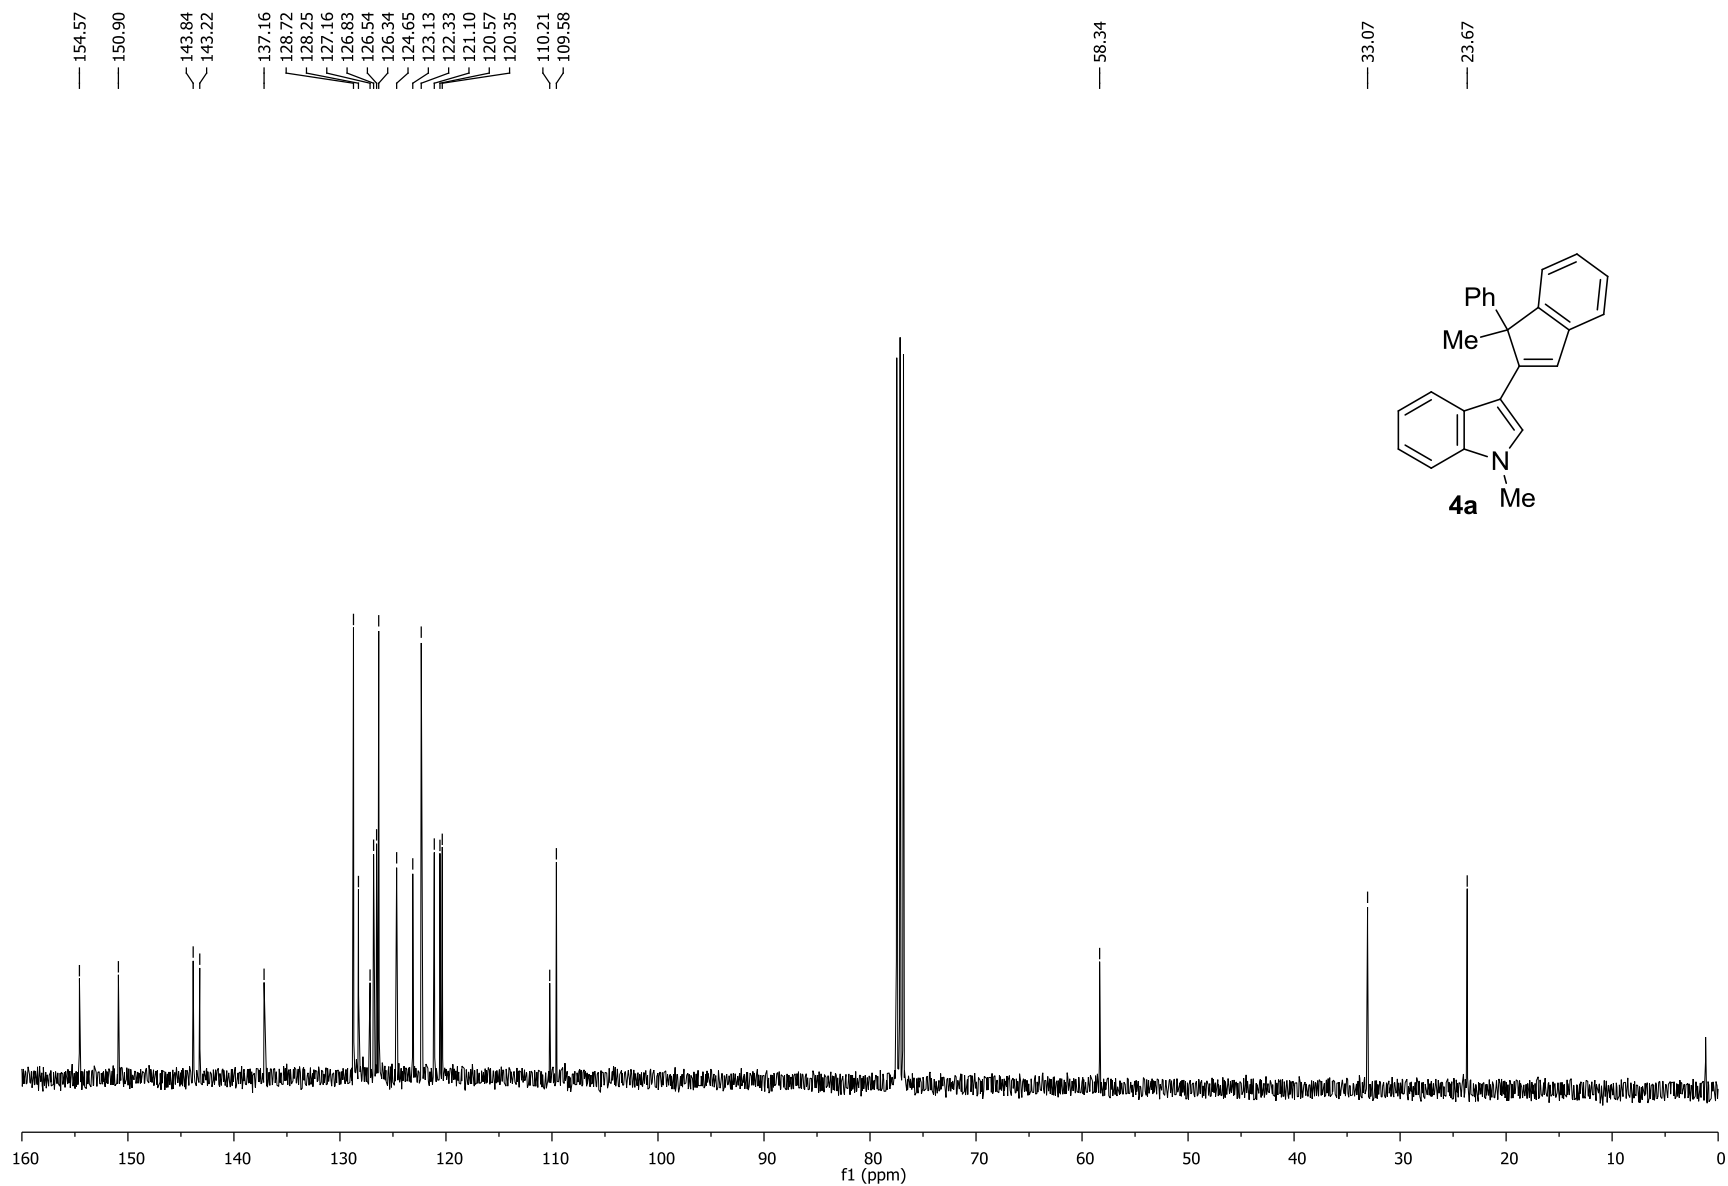

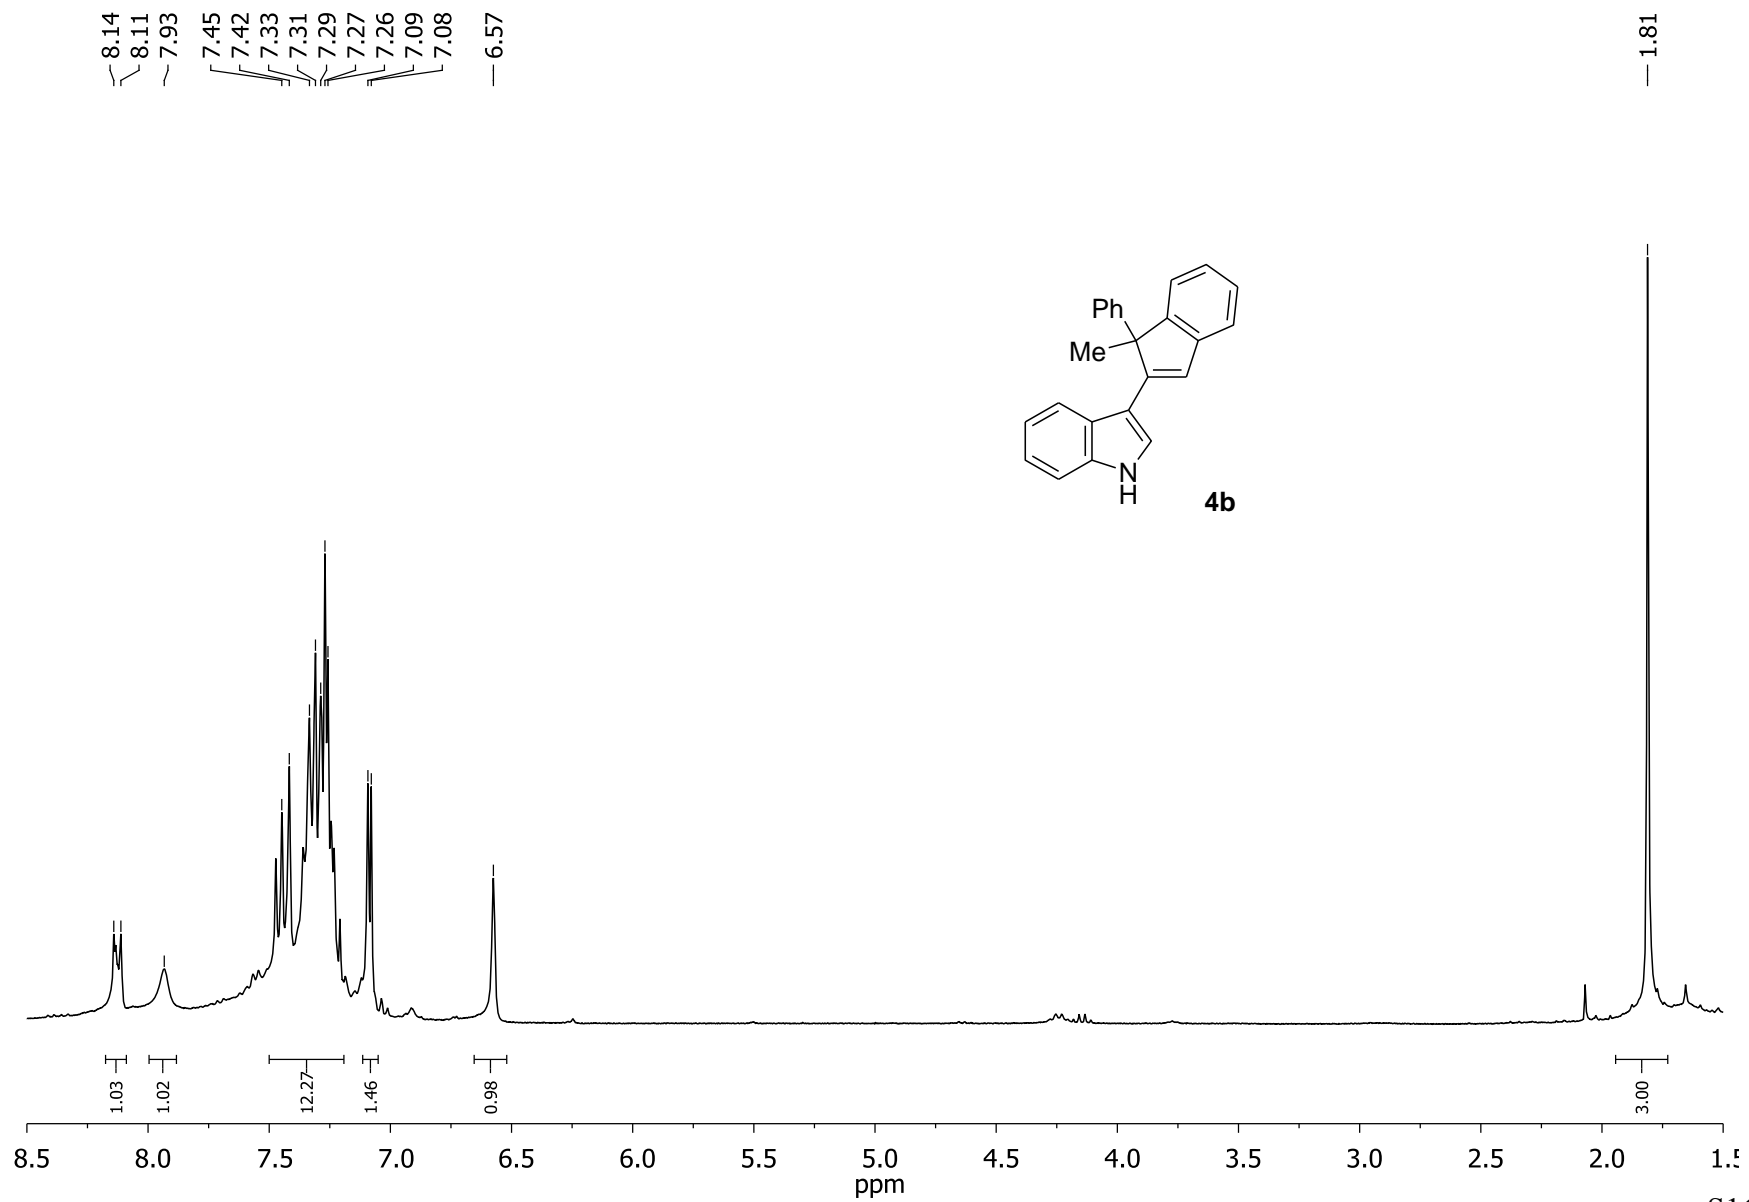



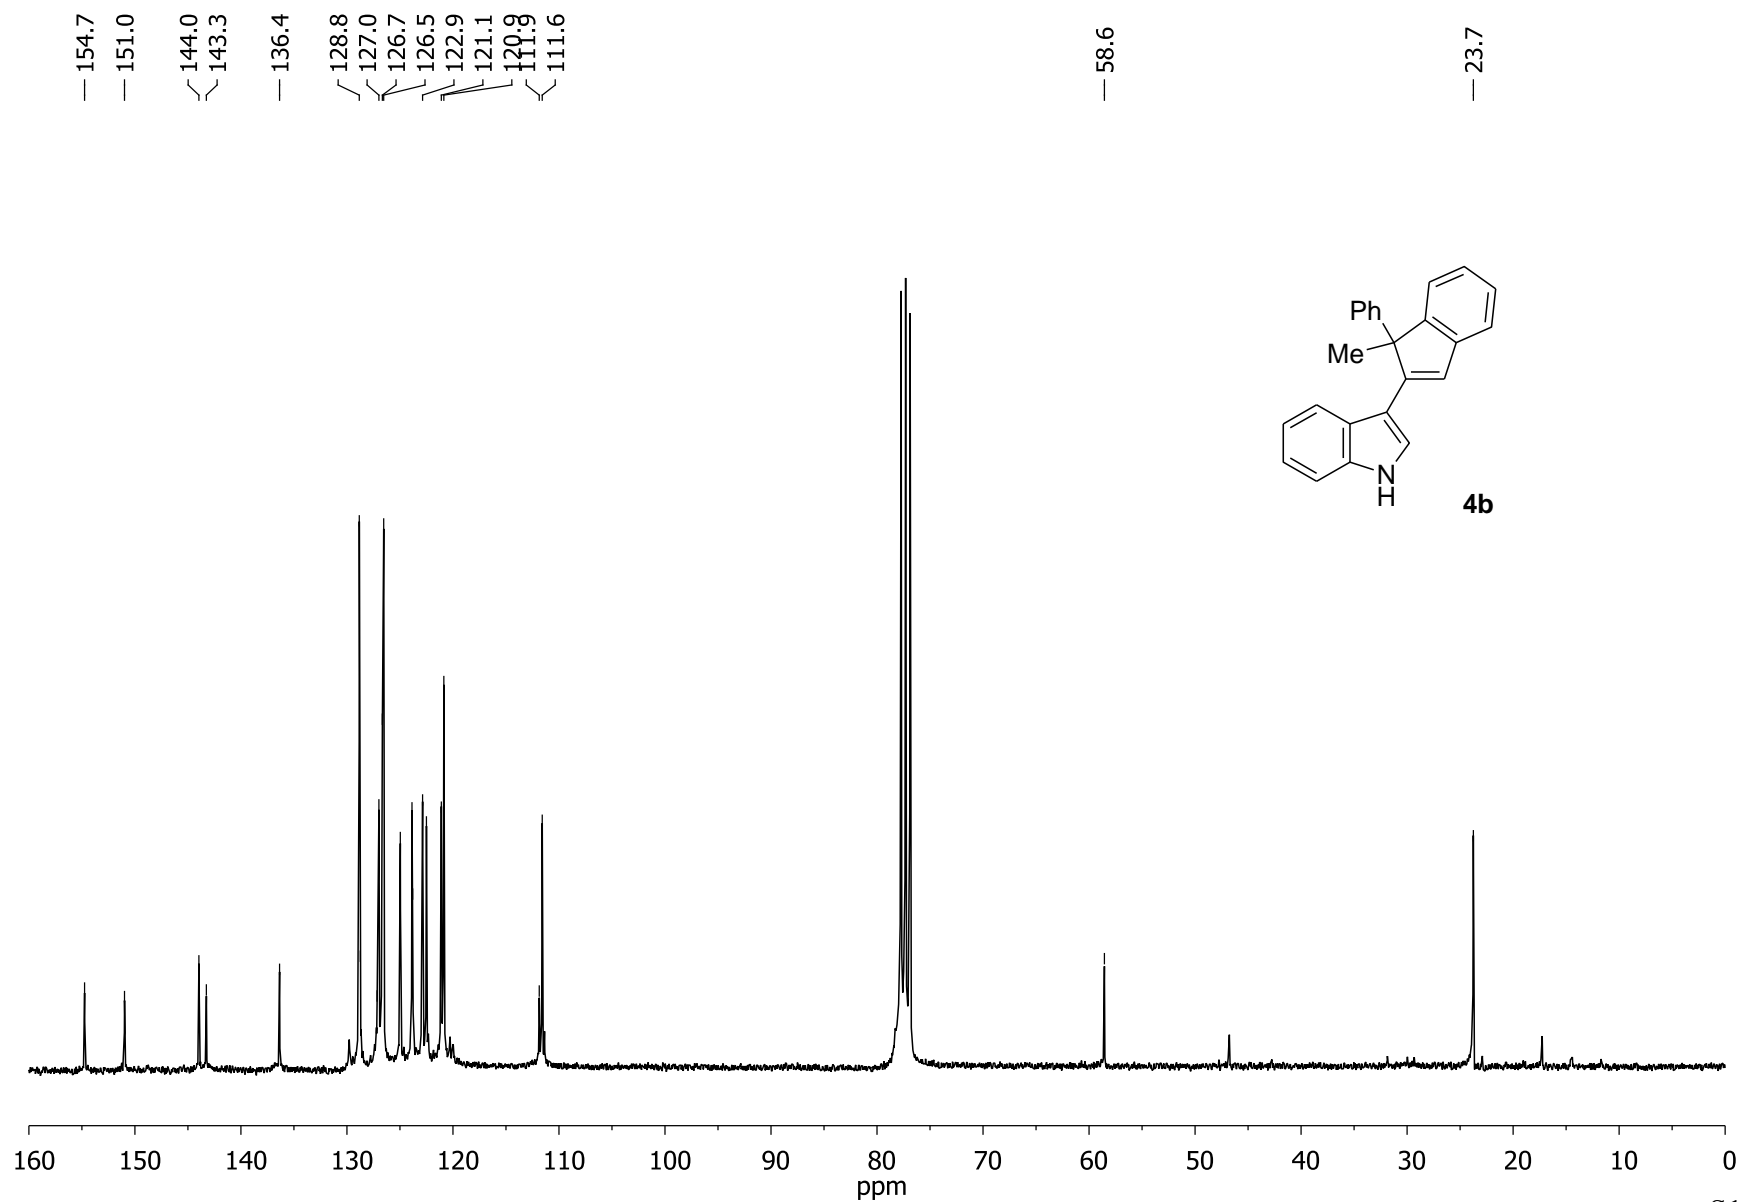

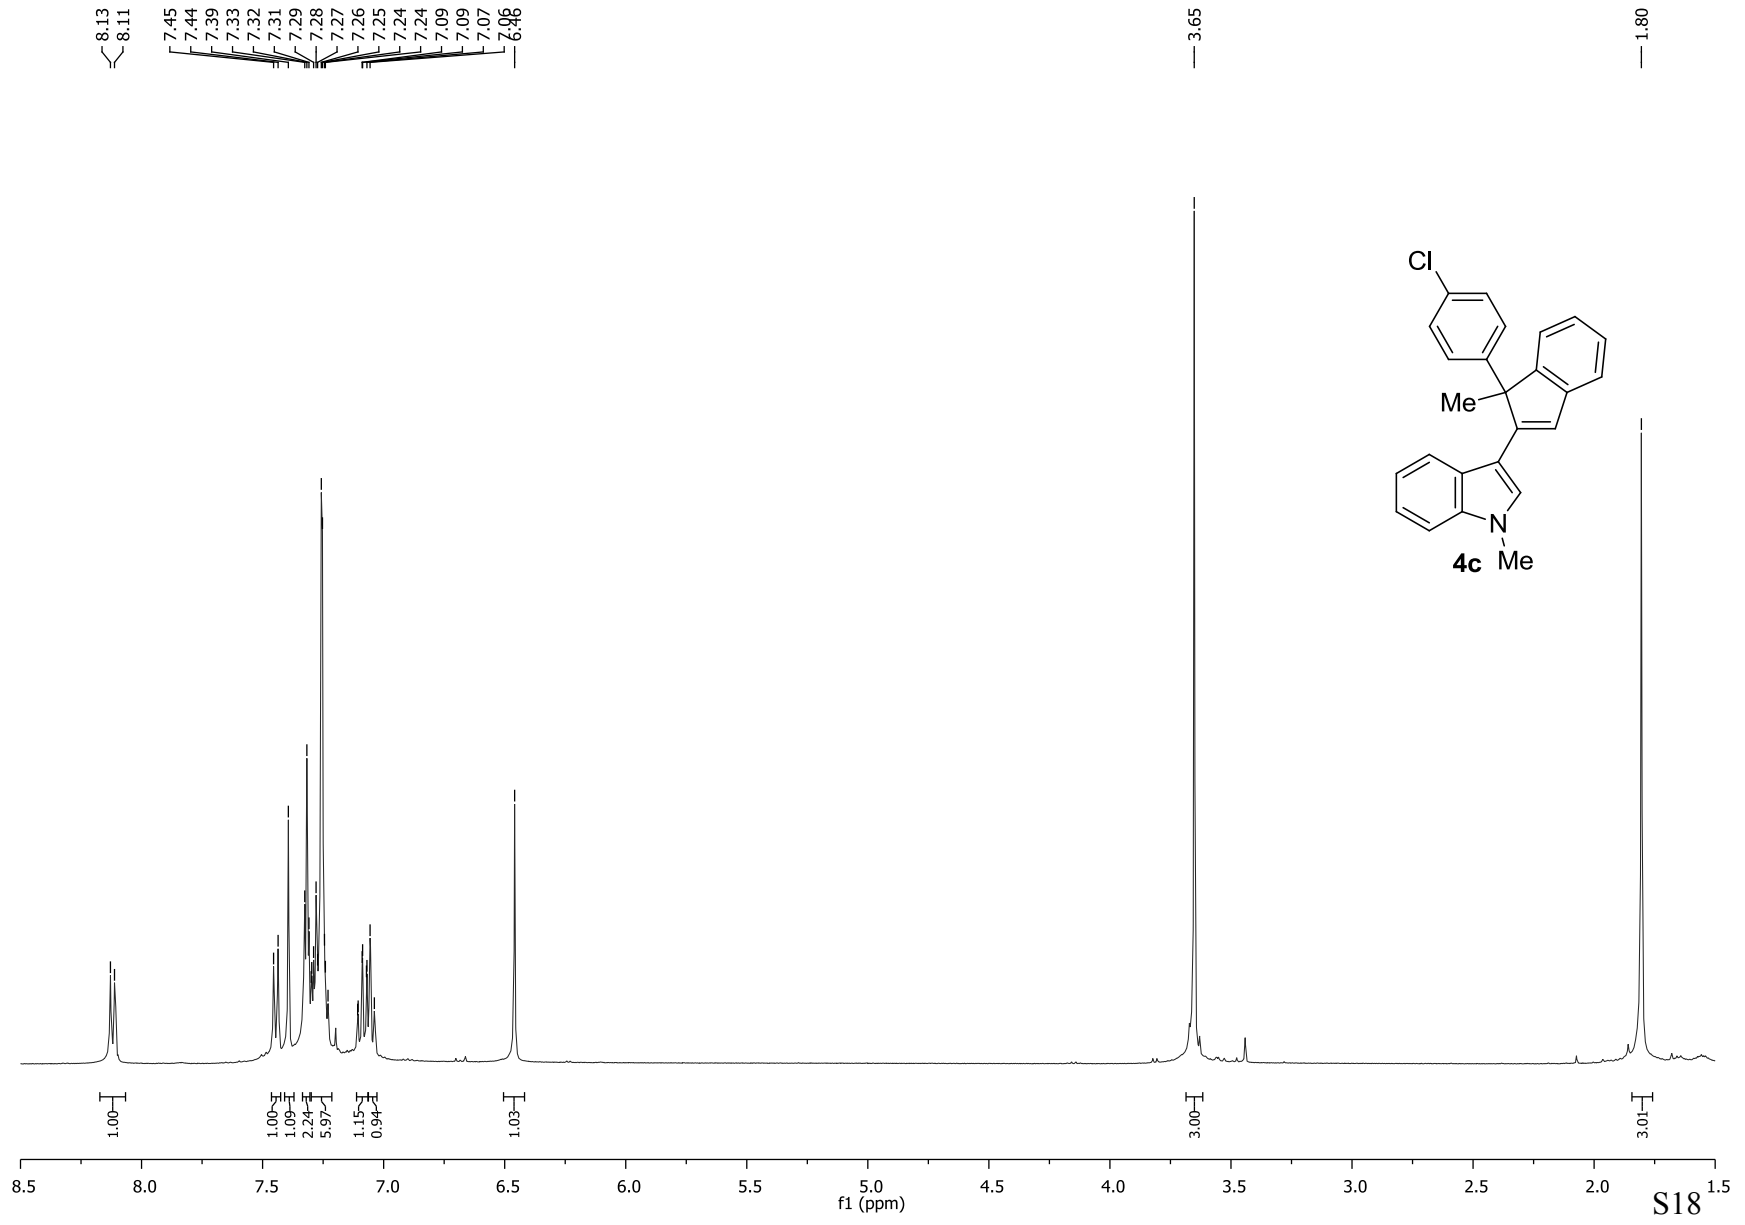

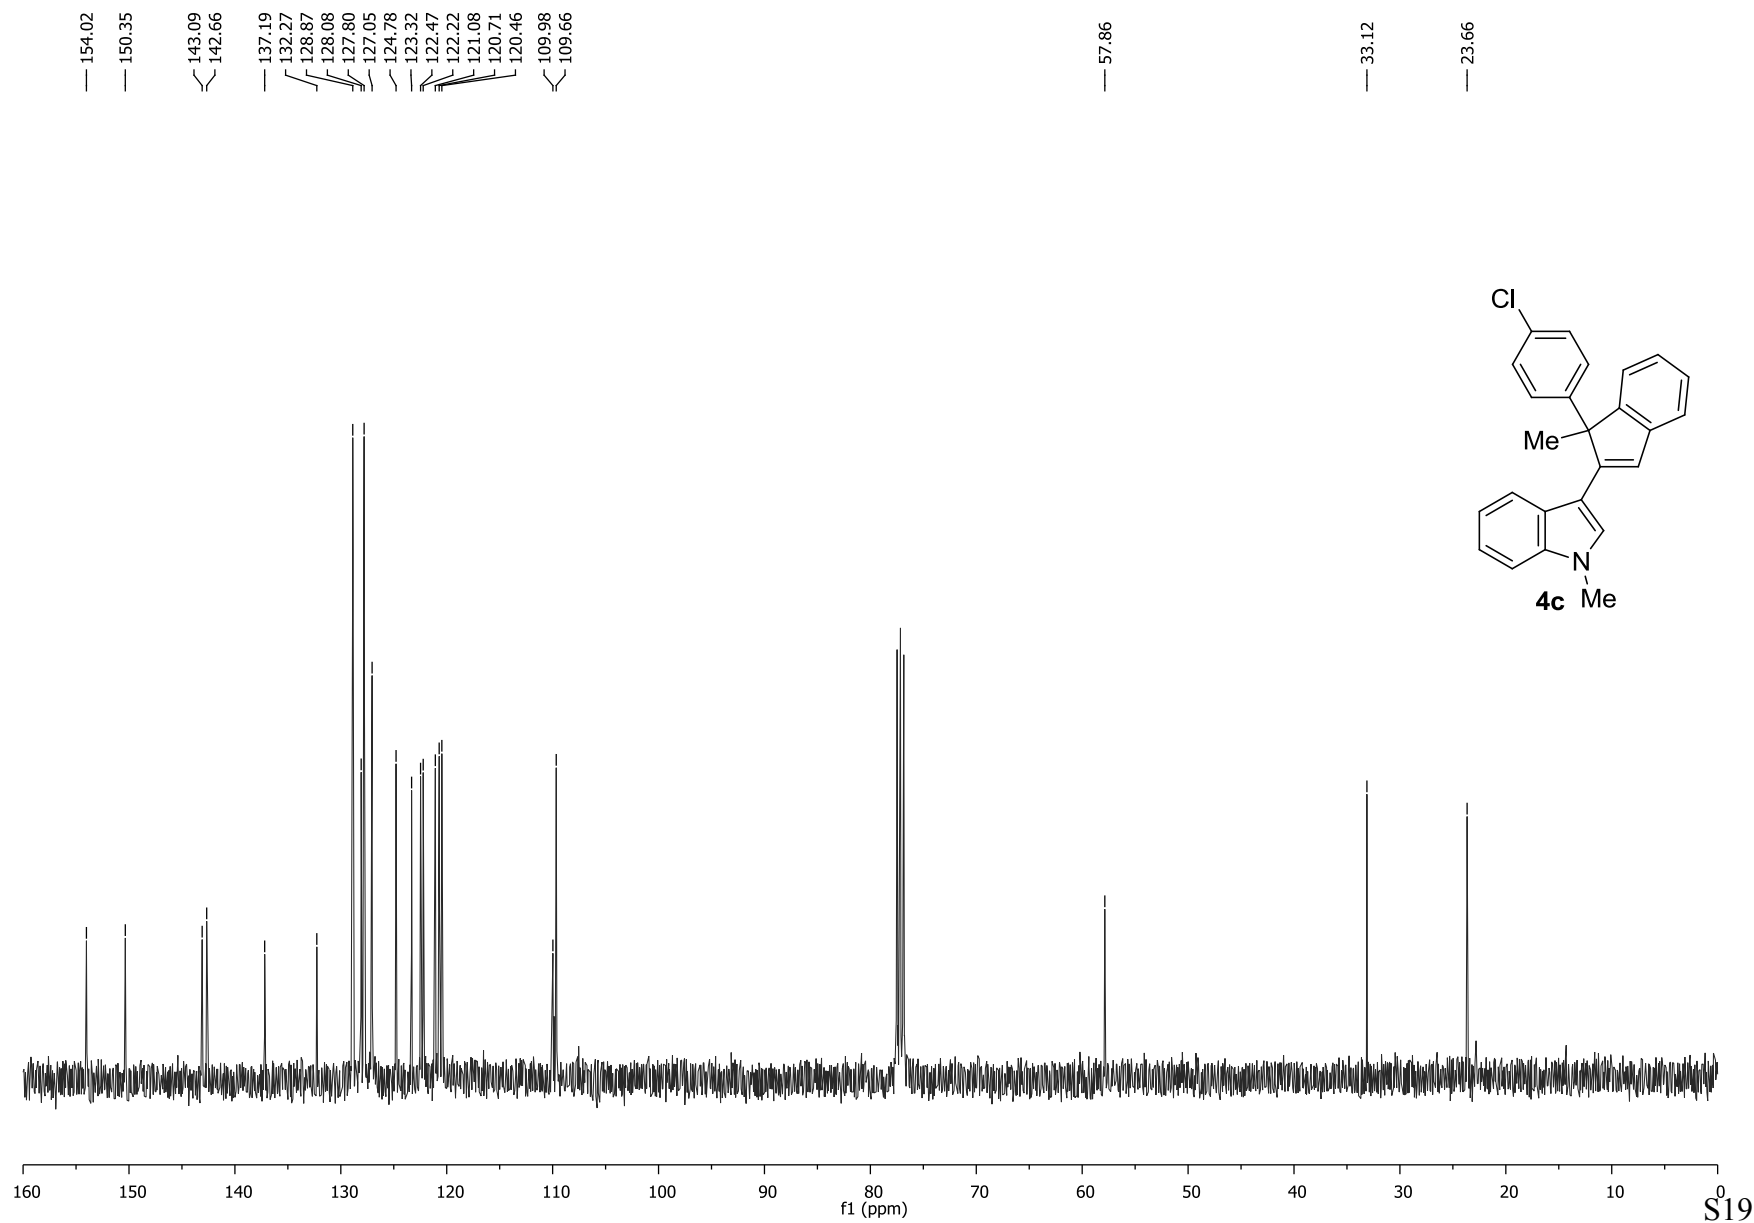

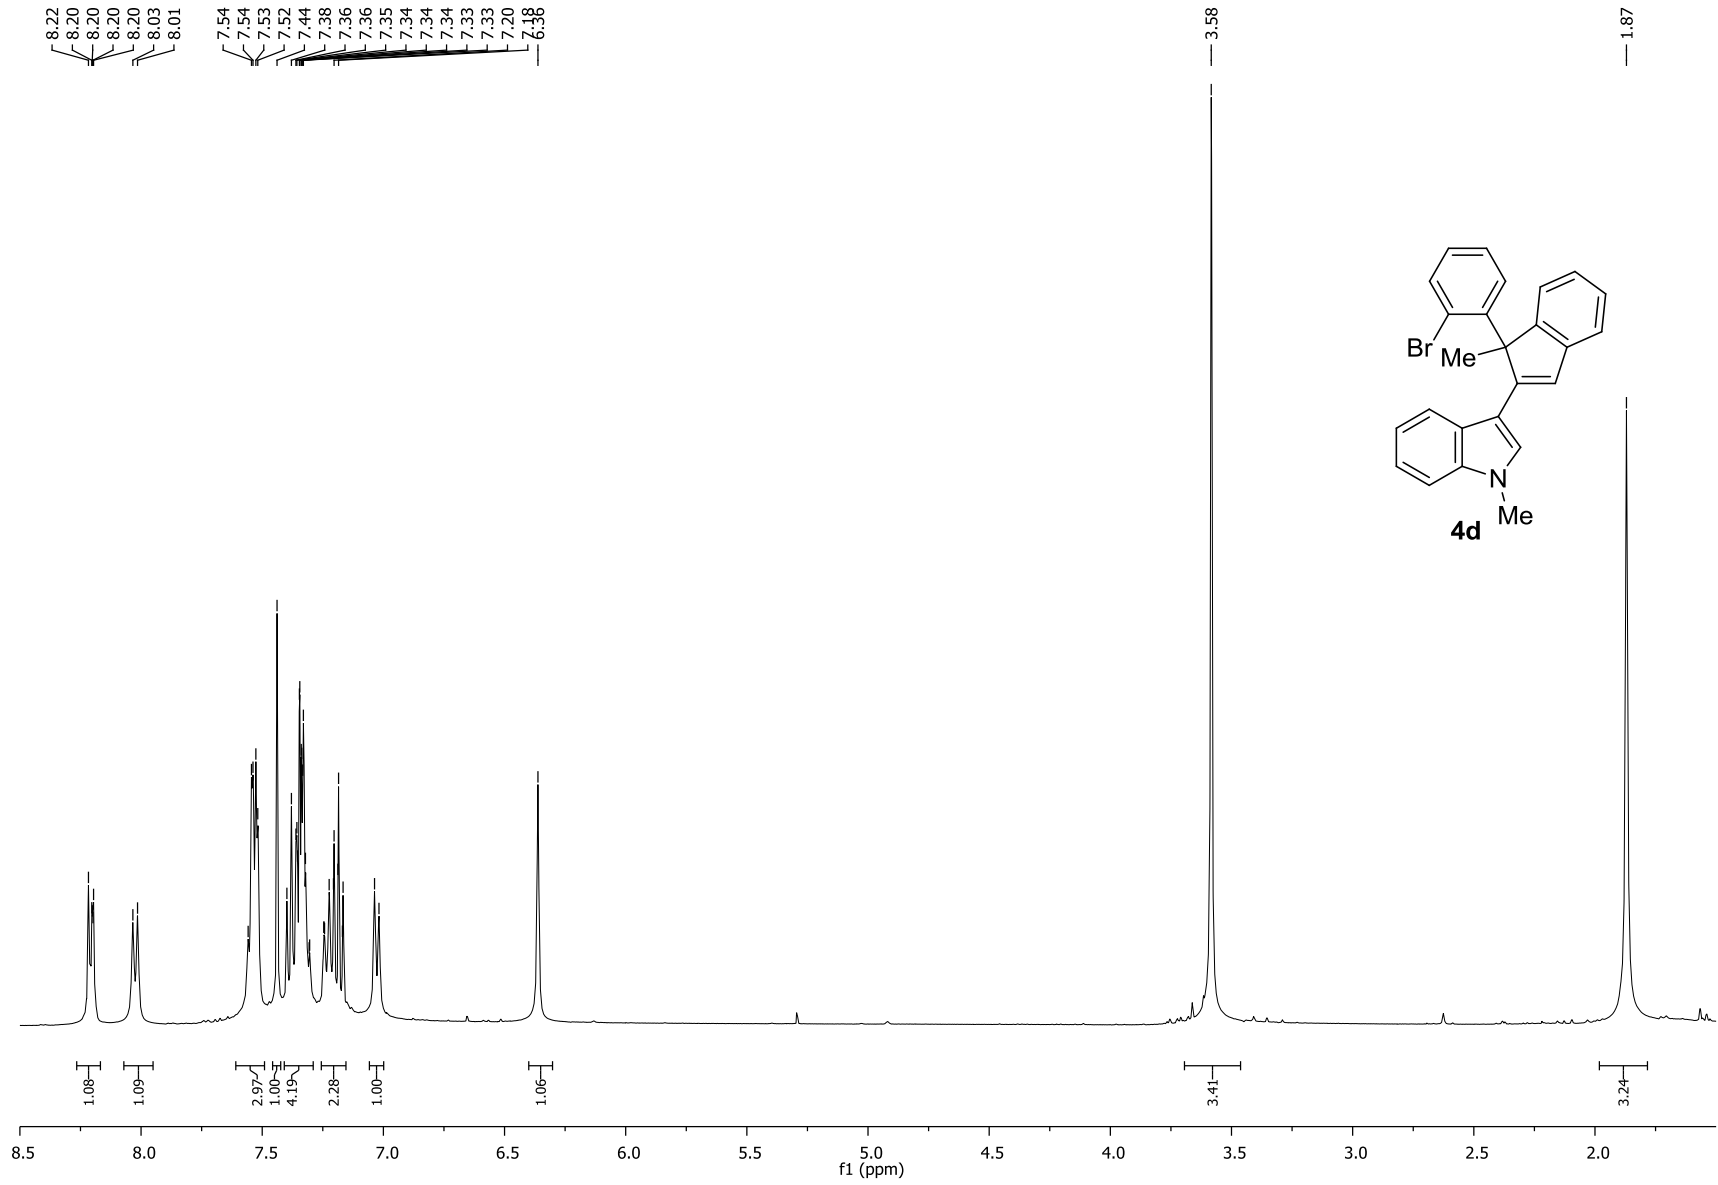

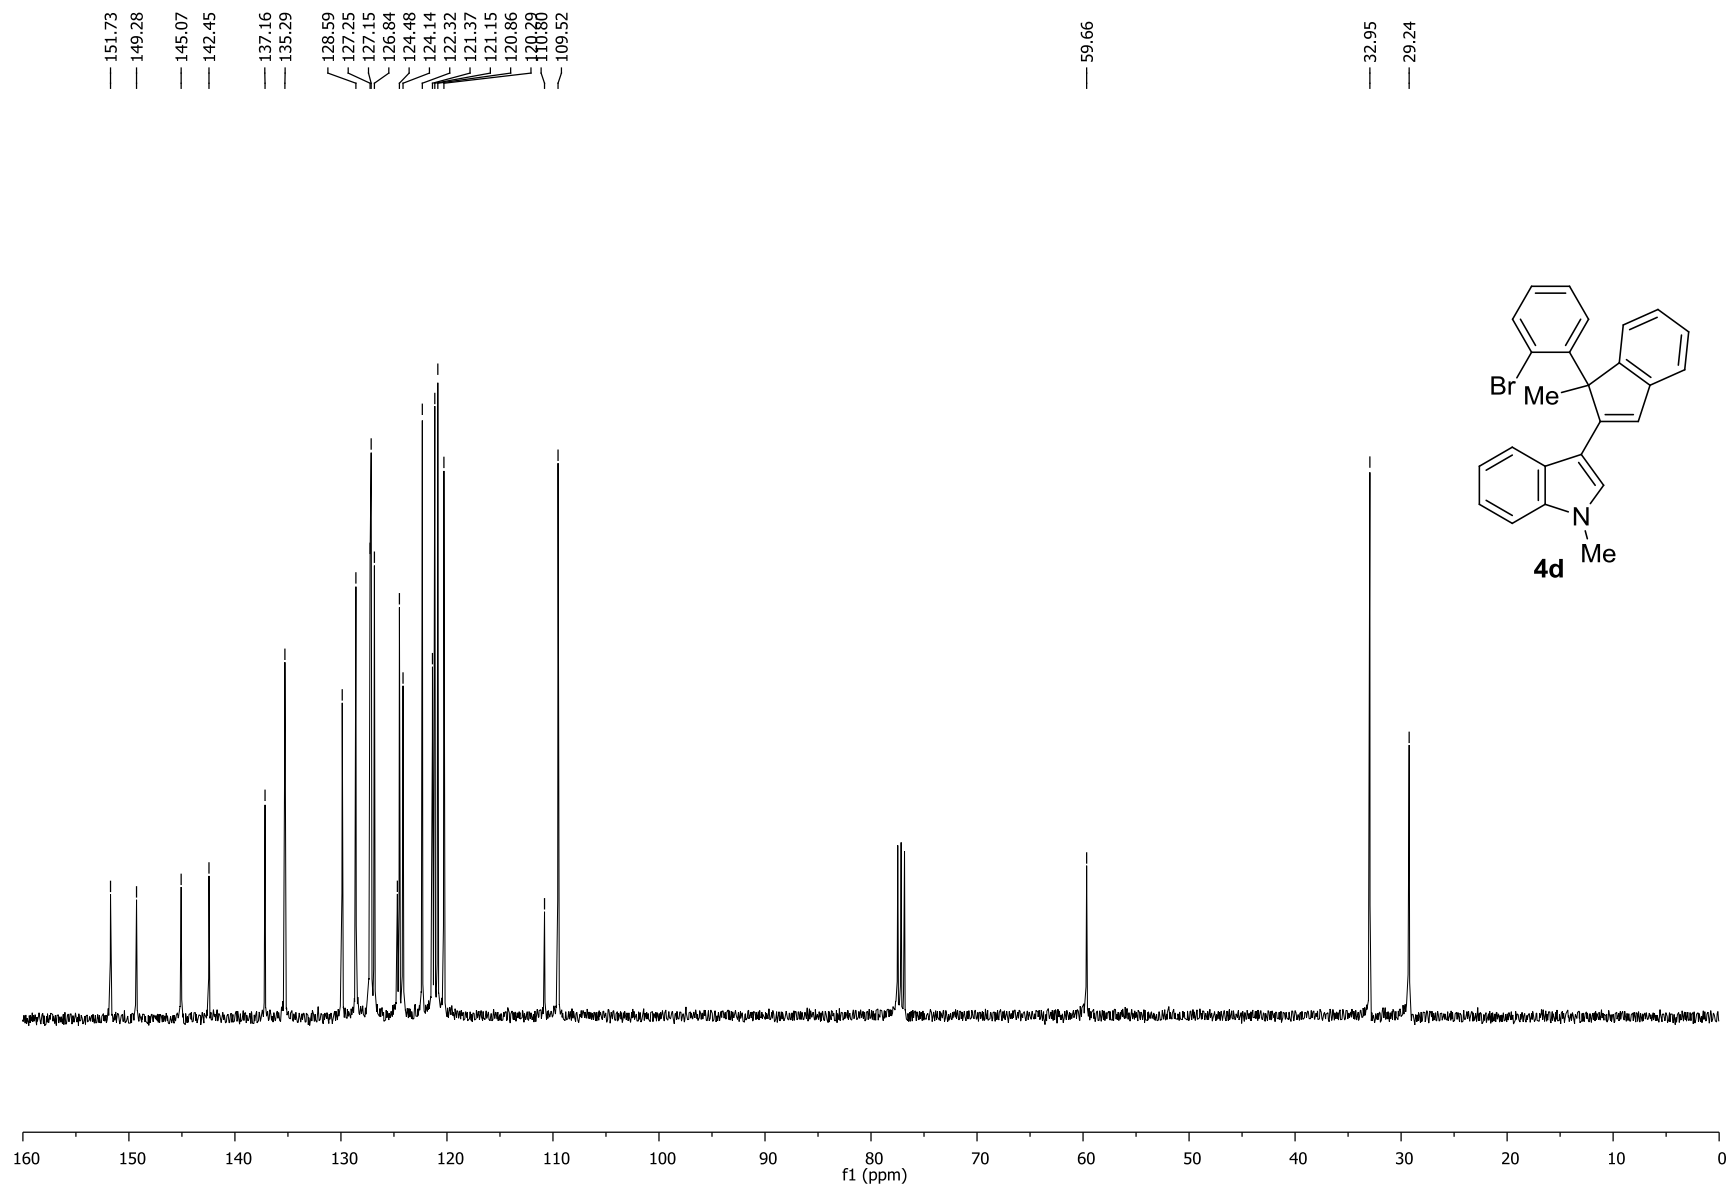

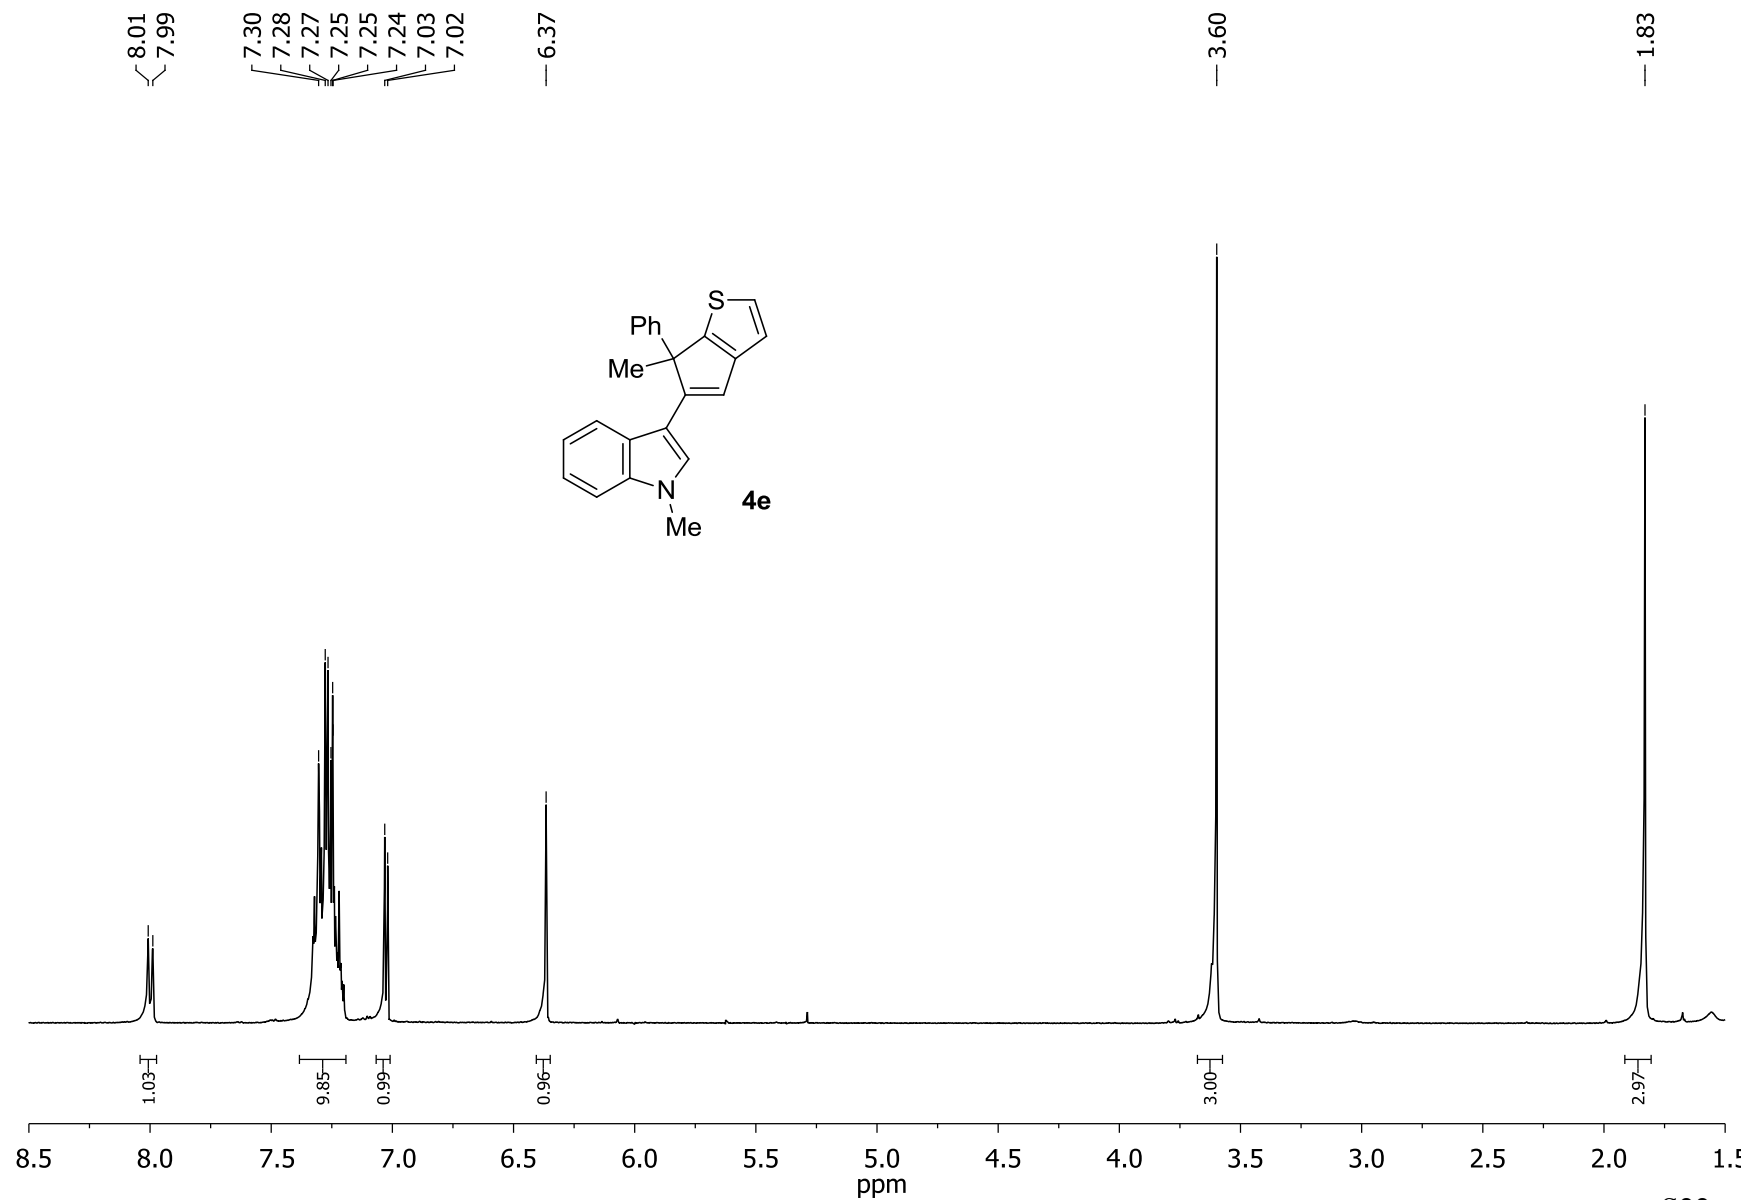

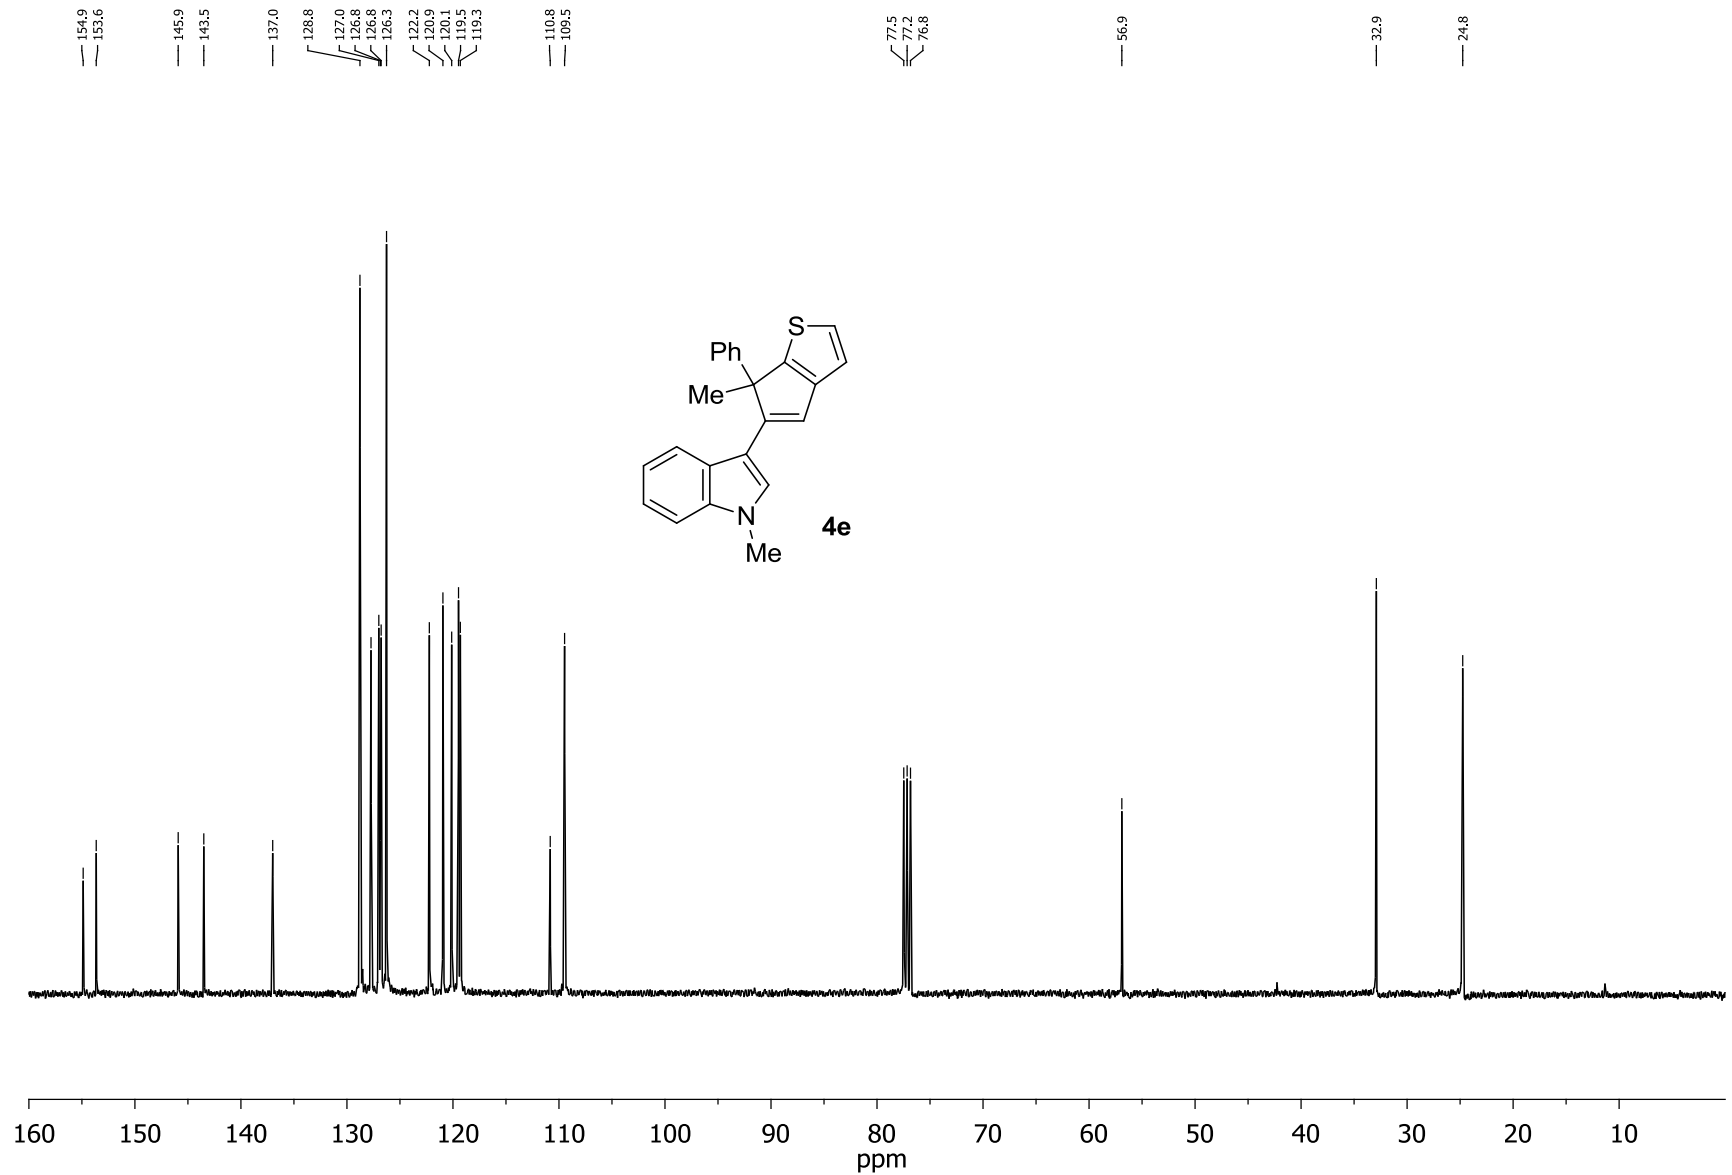

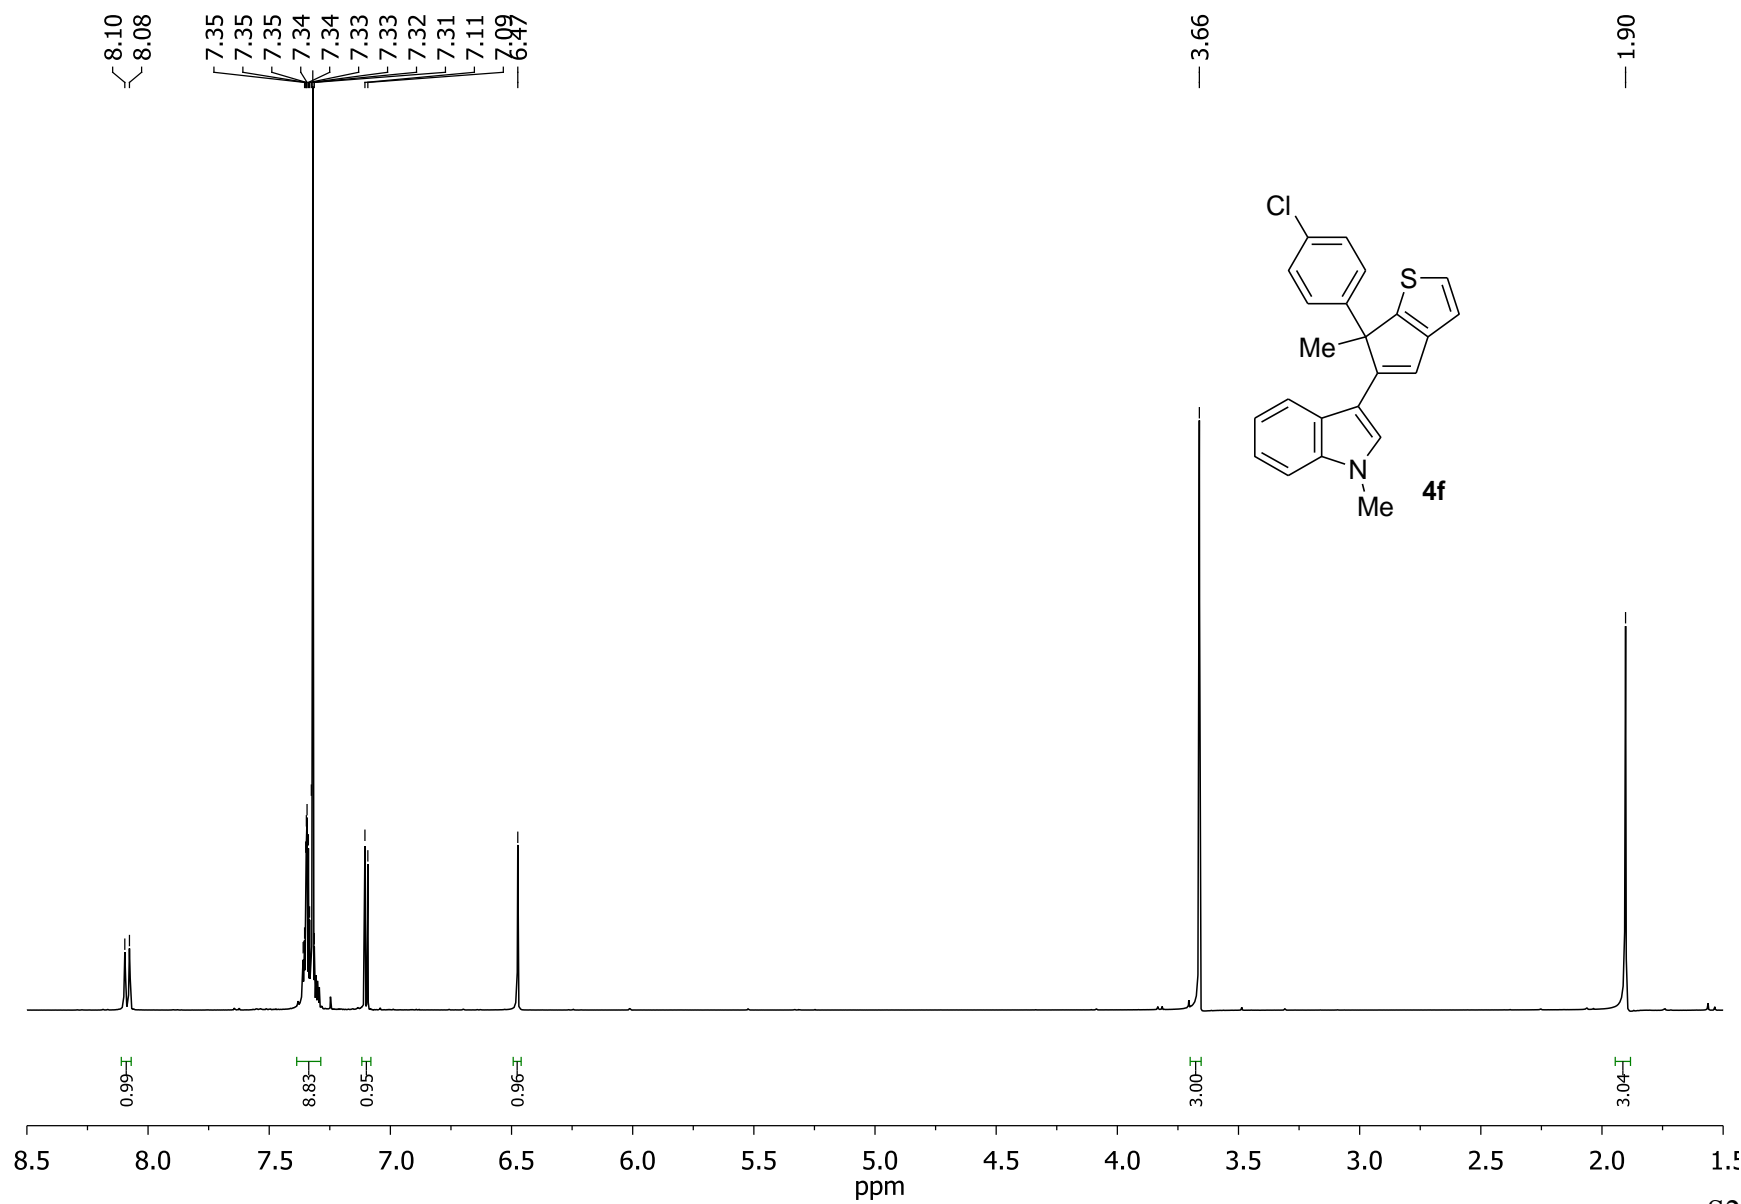



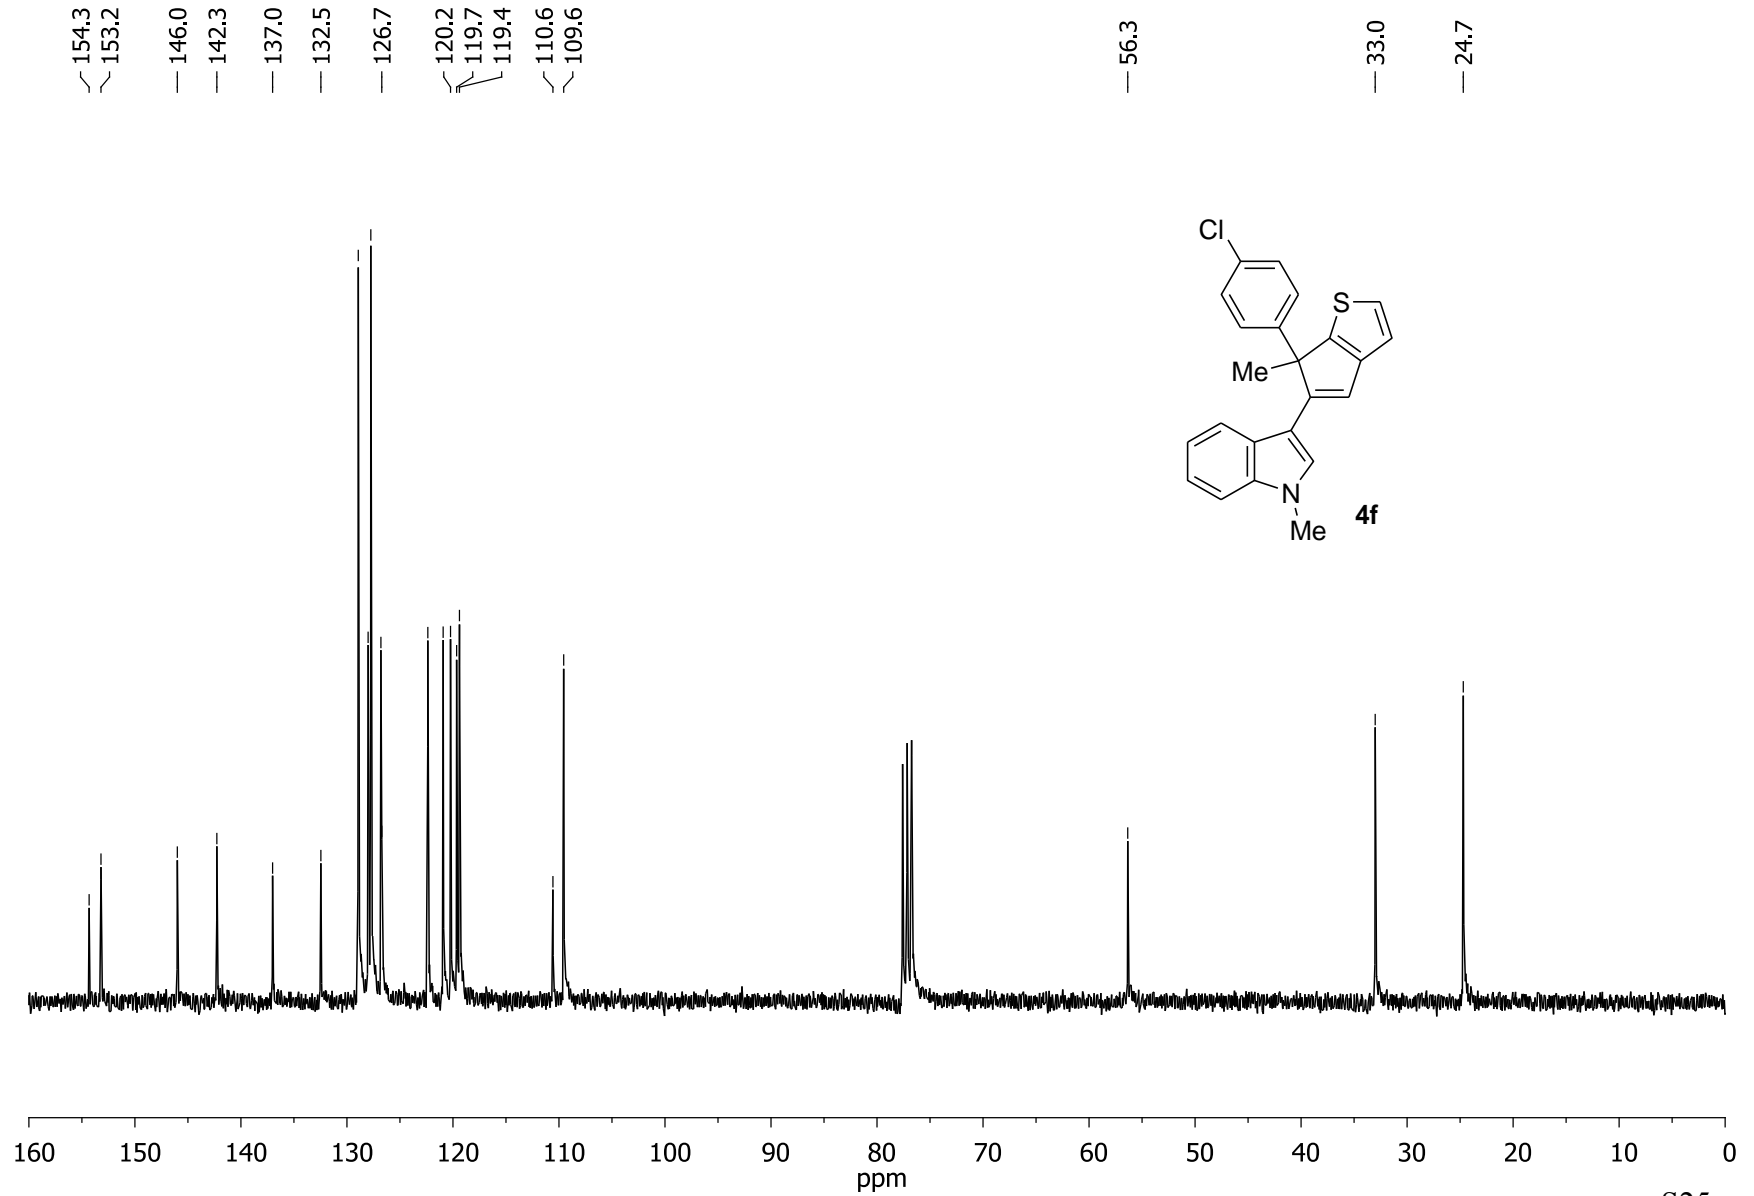

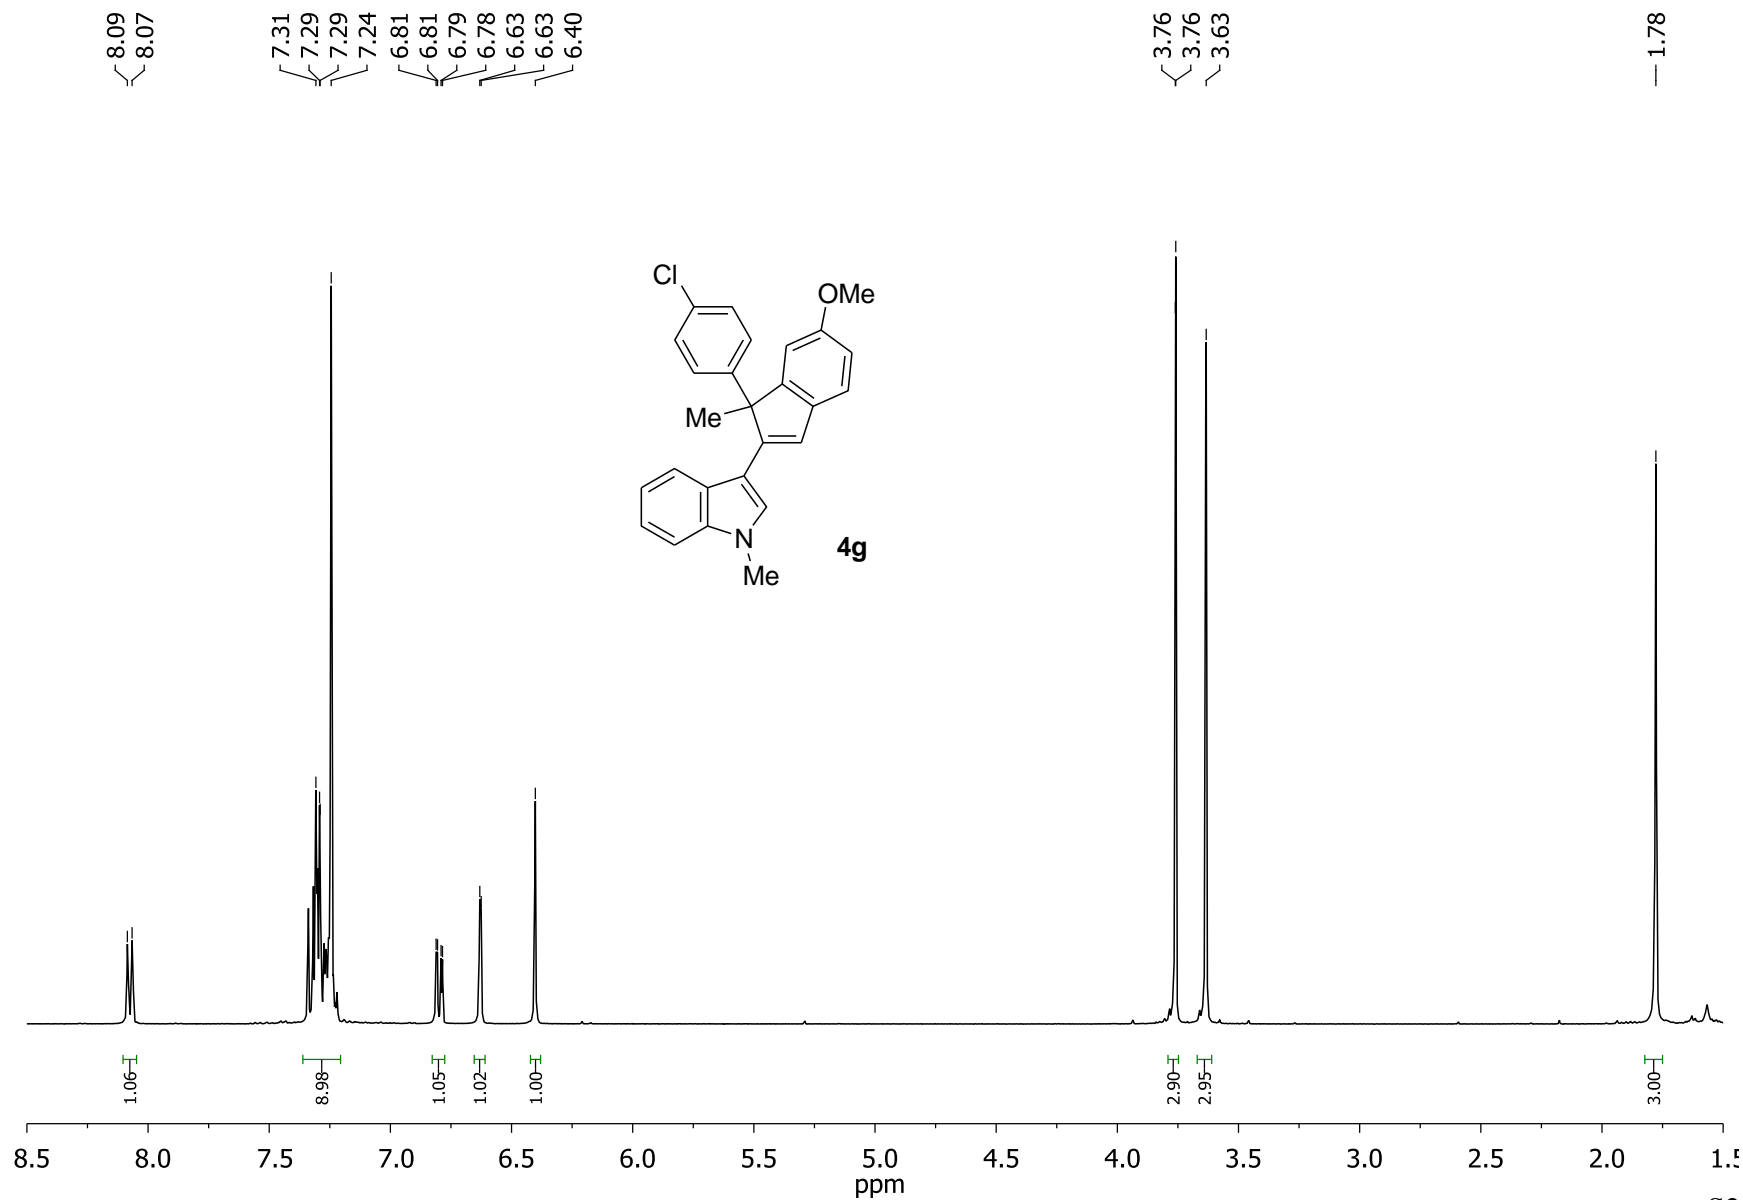

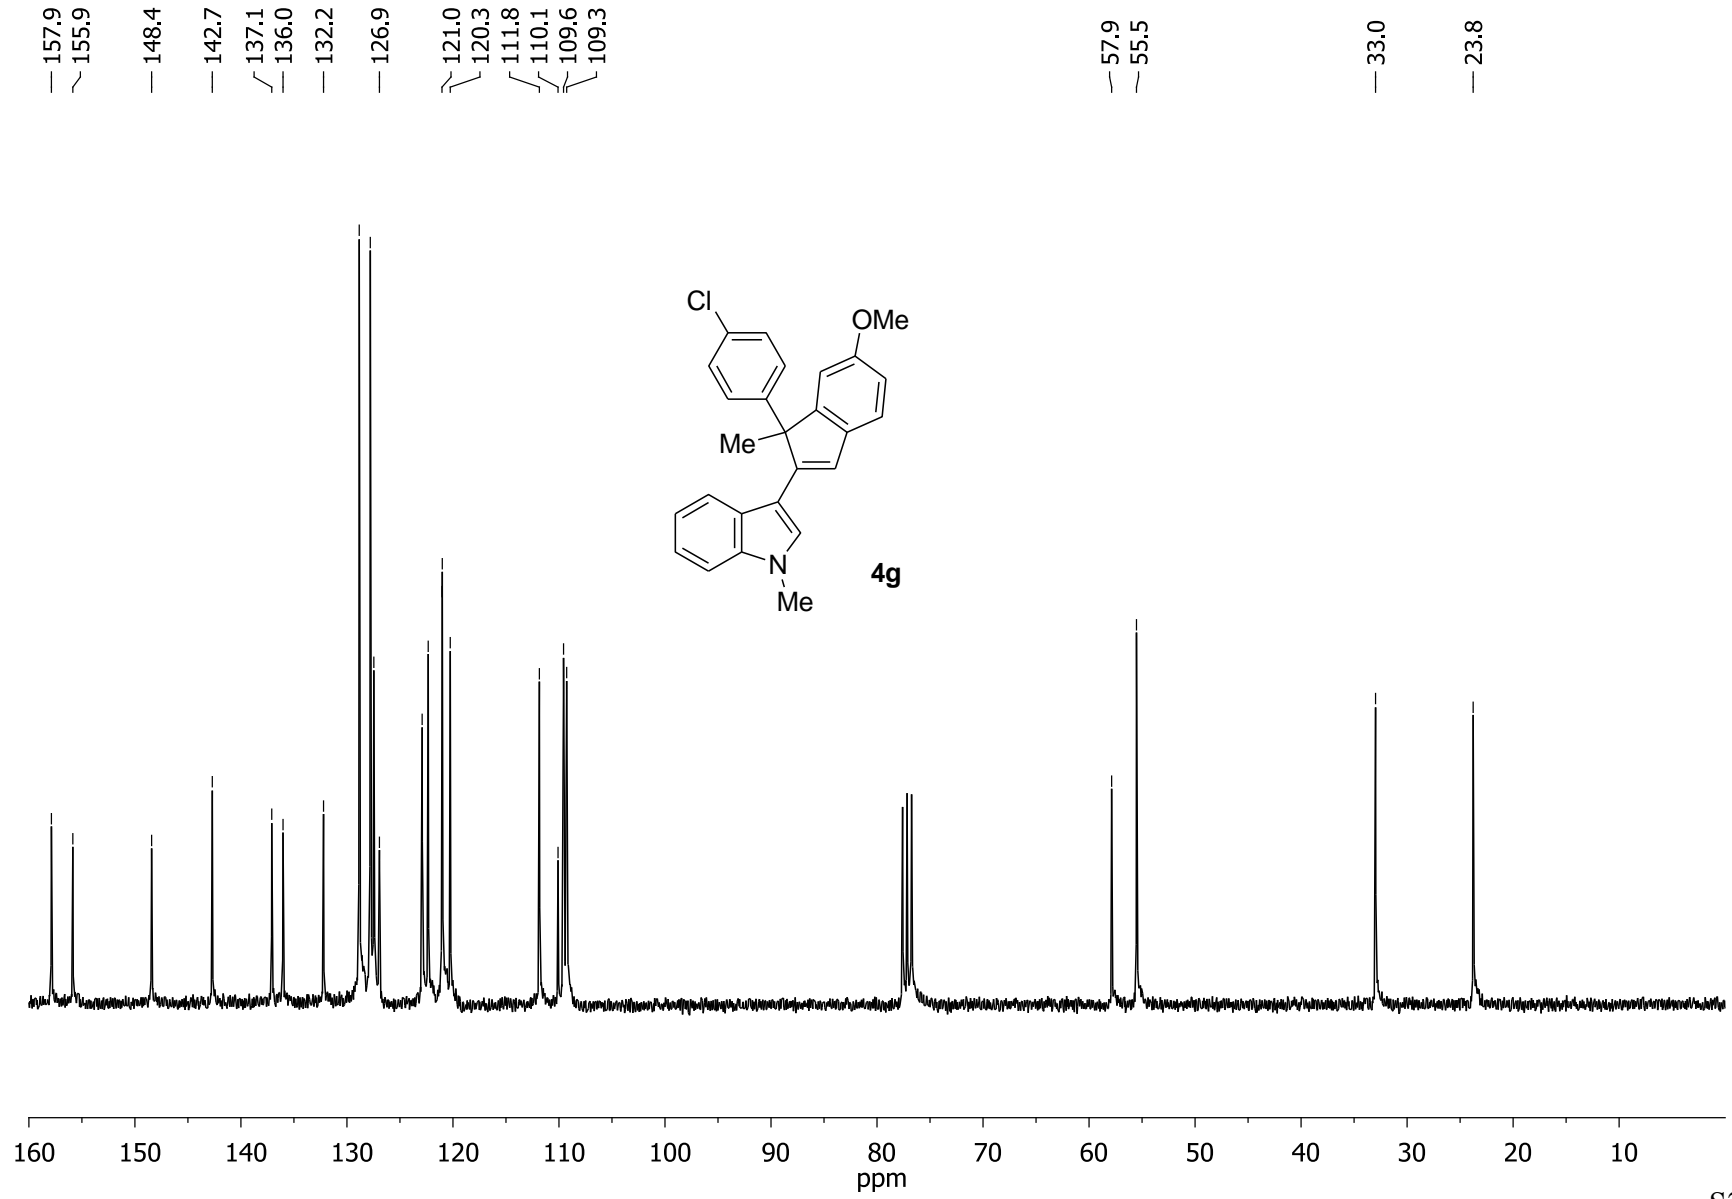

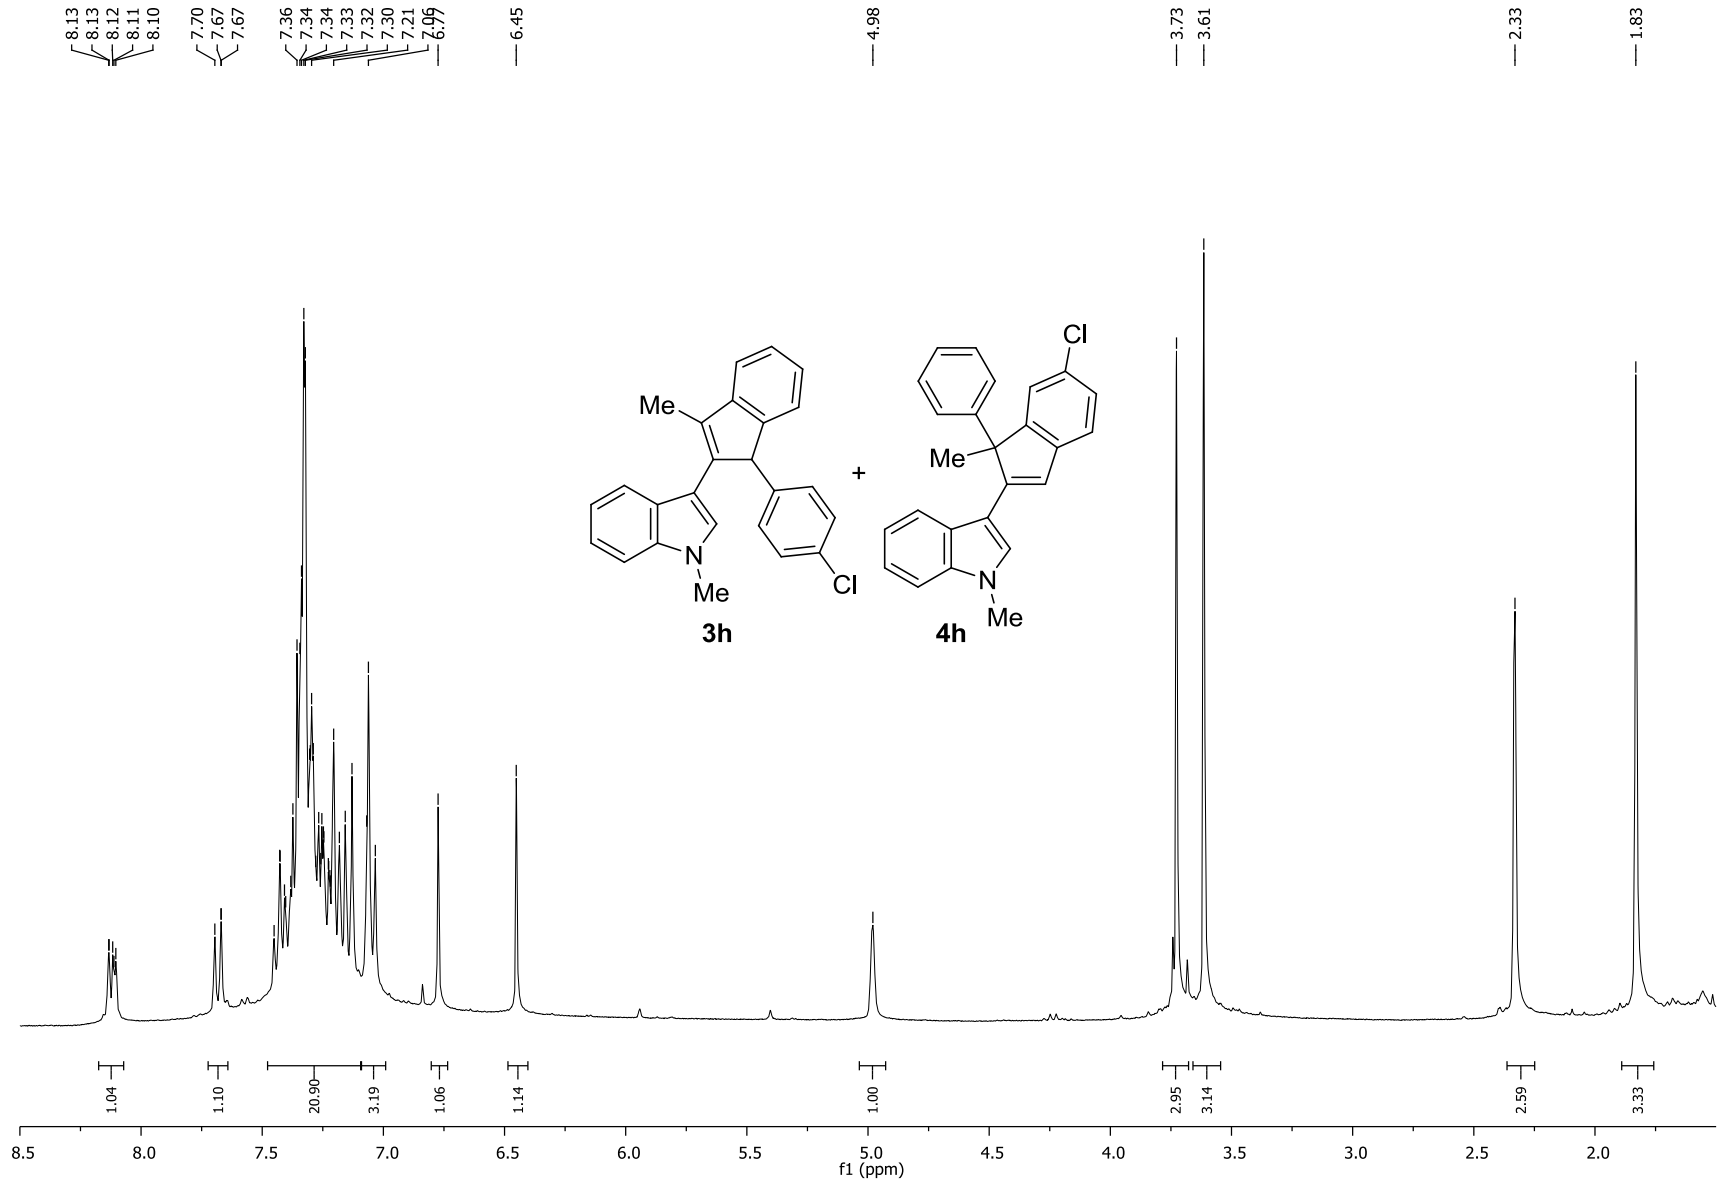

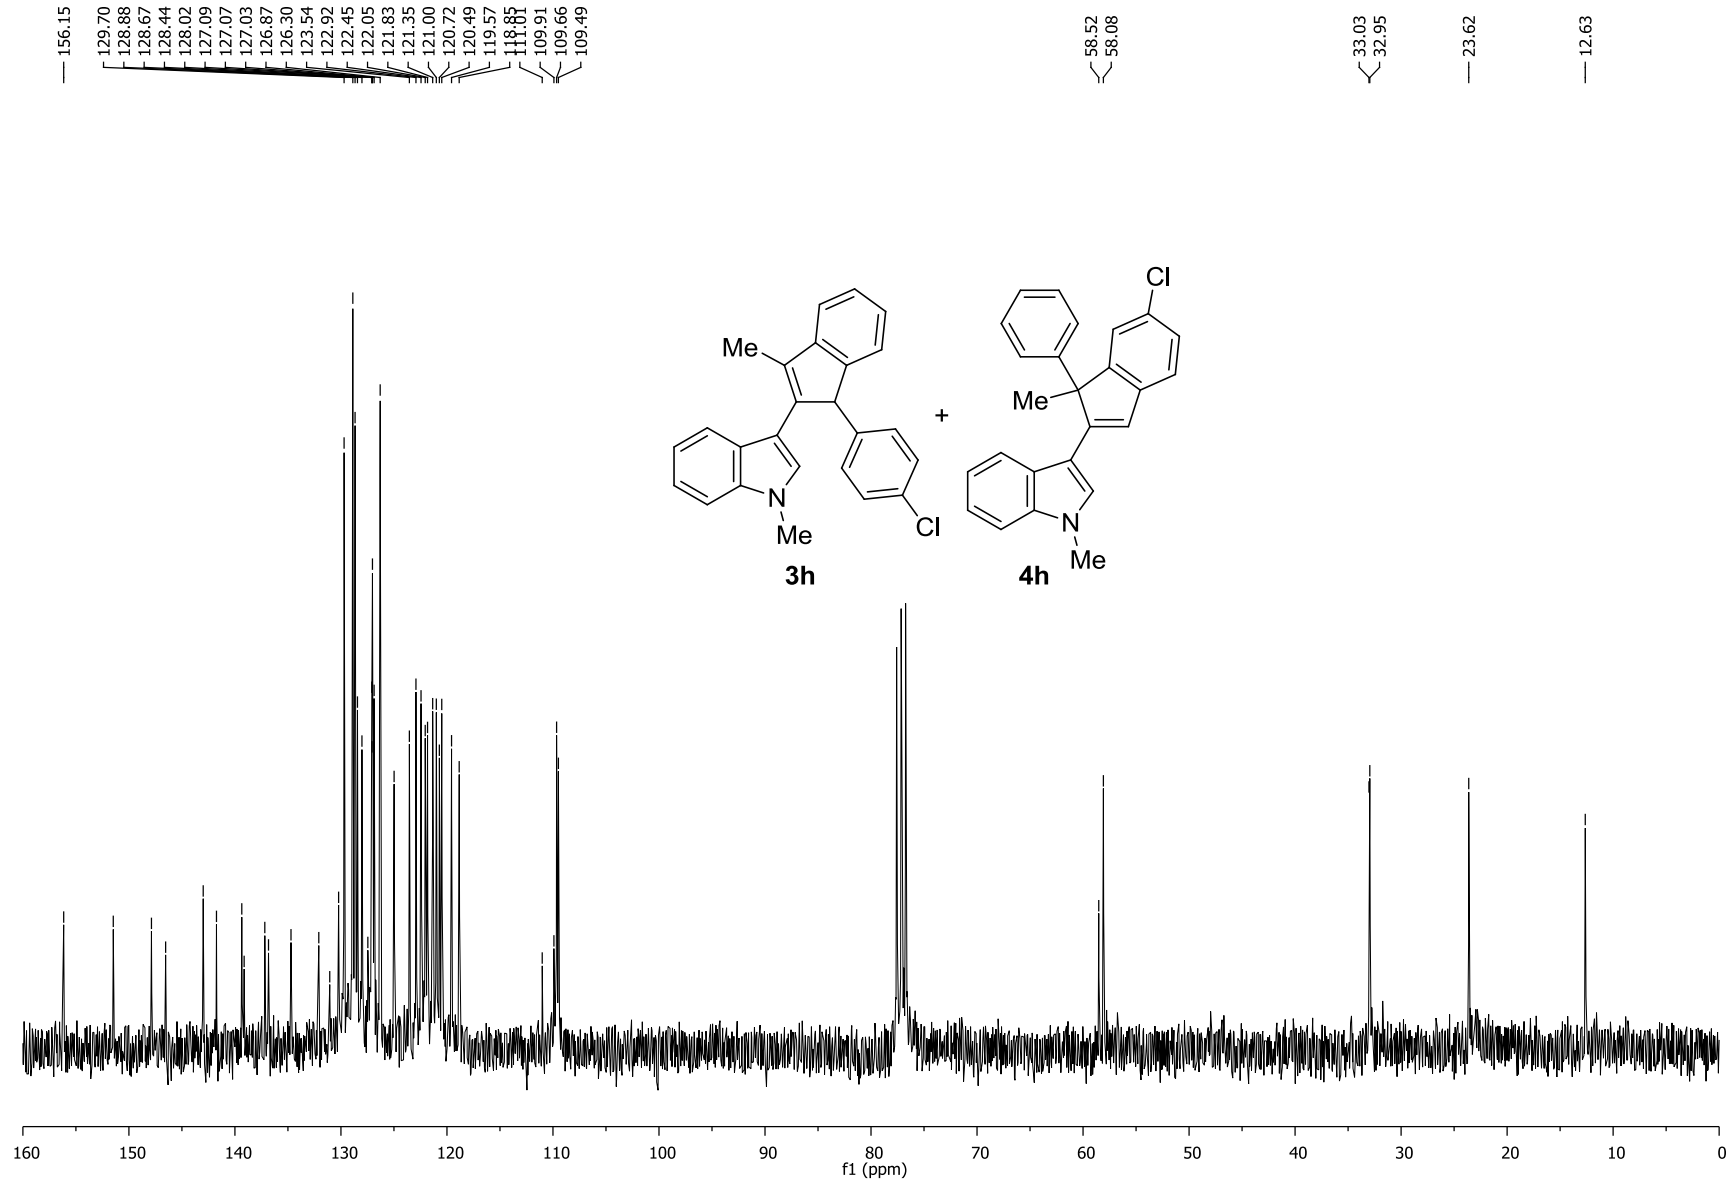

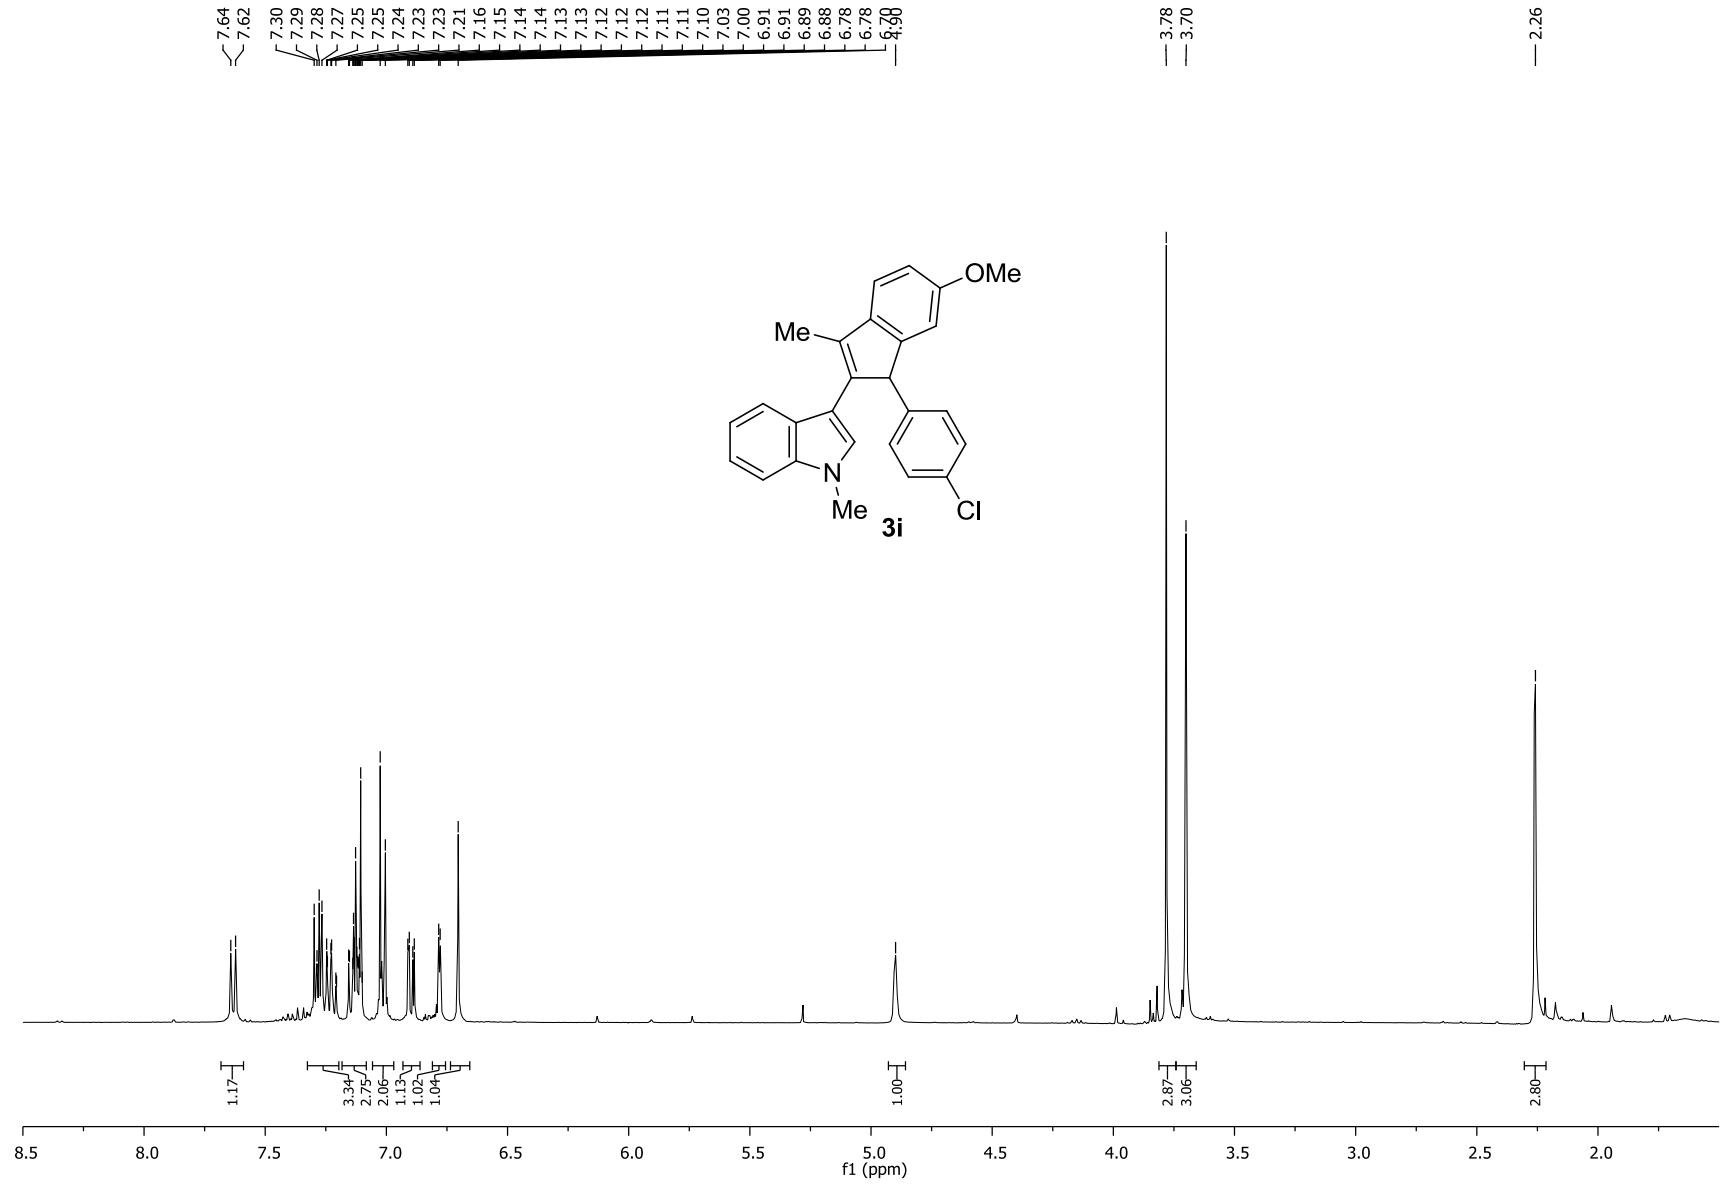

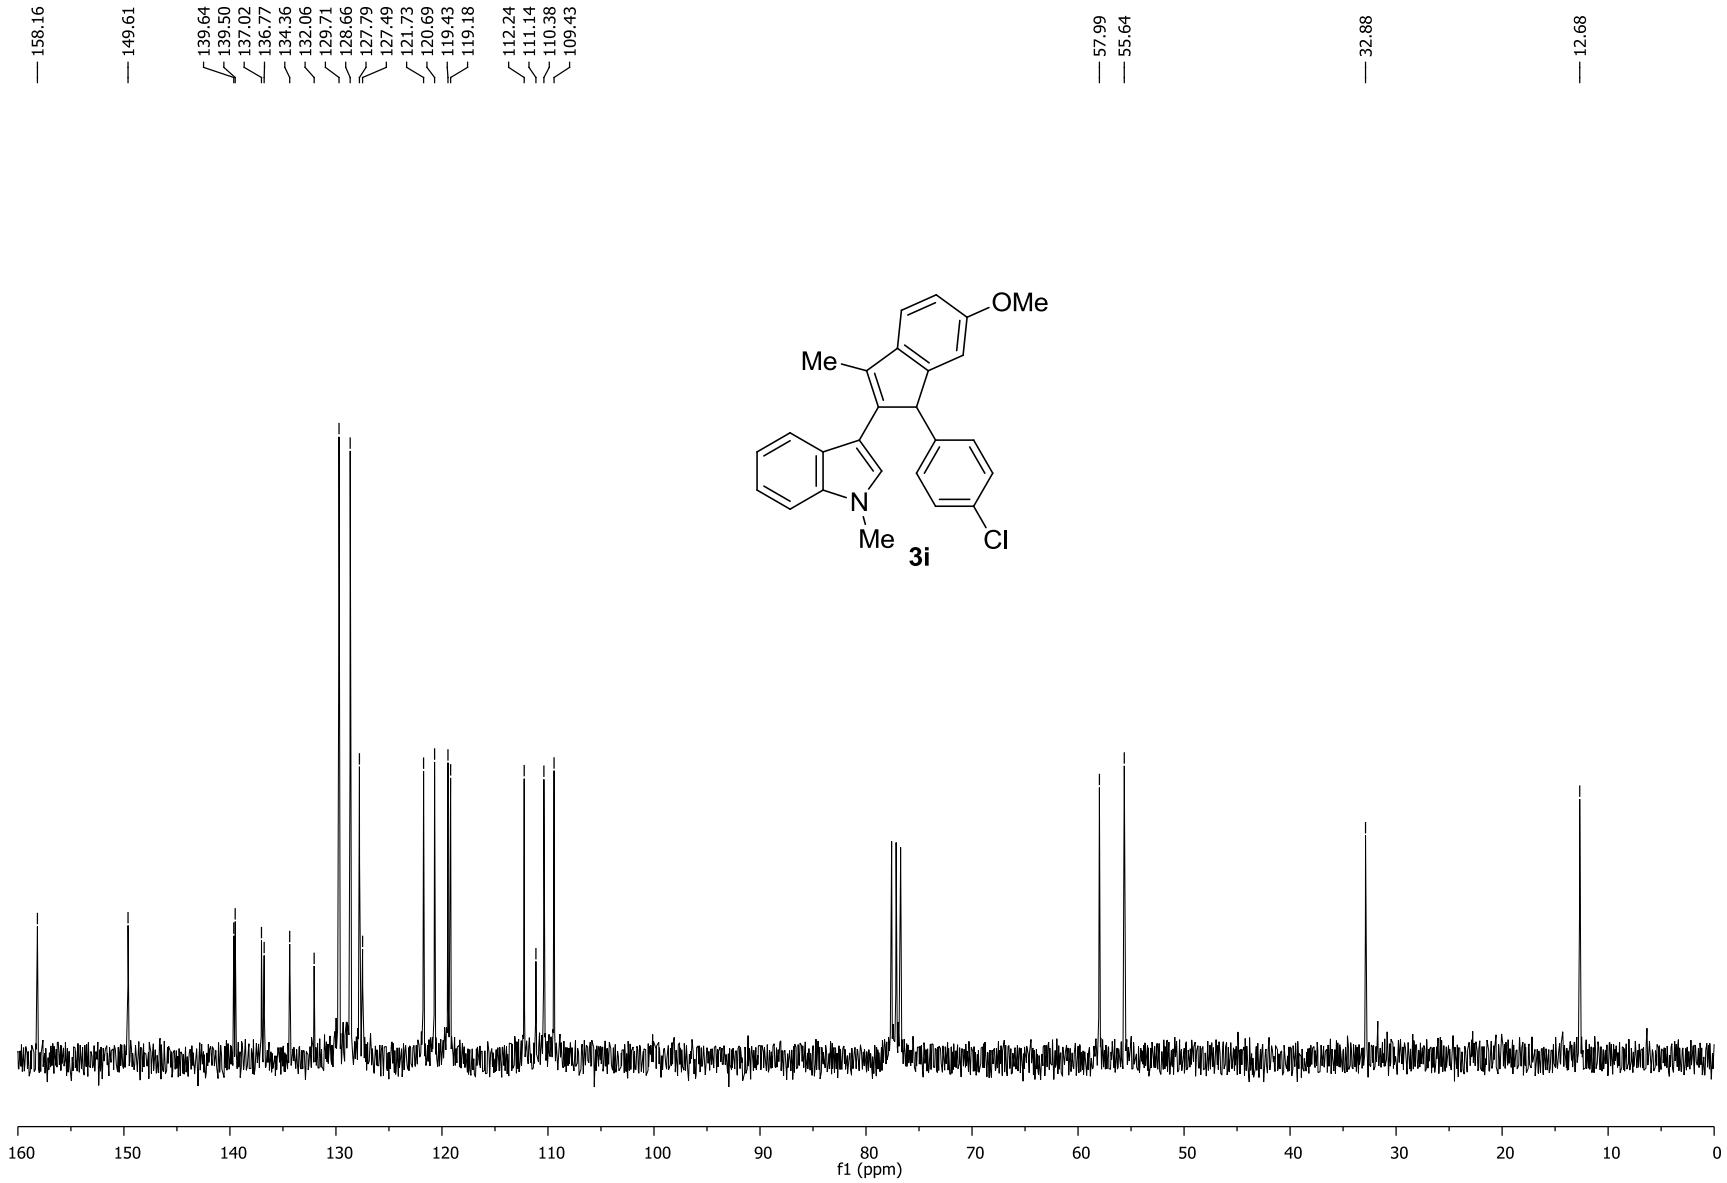

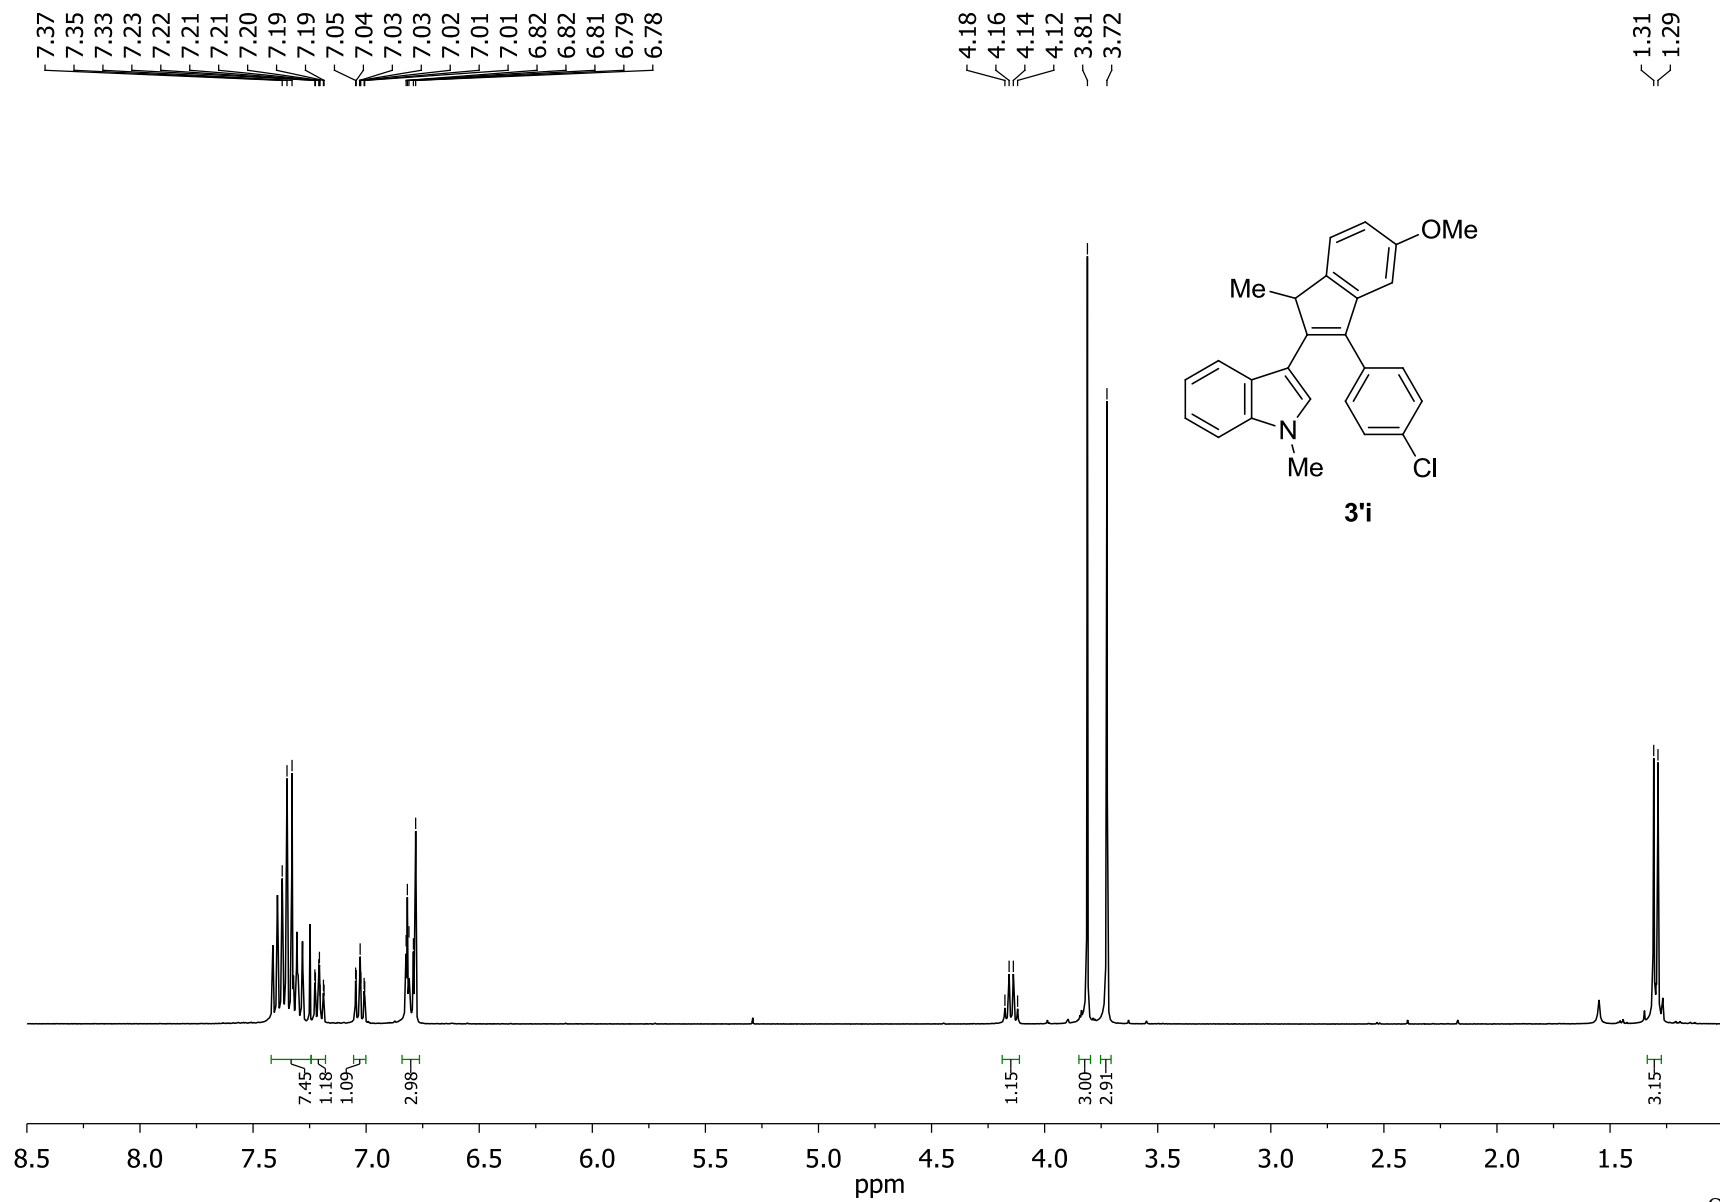



— 159.2  
146.4  
144.9  
140.8  
137.1  
135.2  
134.3  
132.7  
131.0  
129.4  
128.9  
126.8  
123.3  
121.9  
120.9  
119.9  
110.5  
110.1  
109.4  
105.3

— 55.7

— 46.0

— 33.1

— 17.5

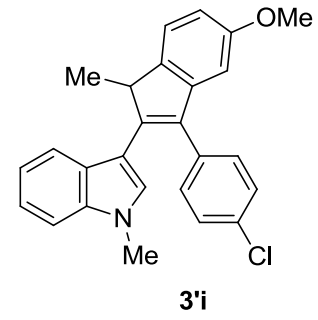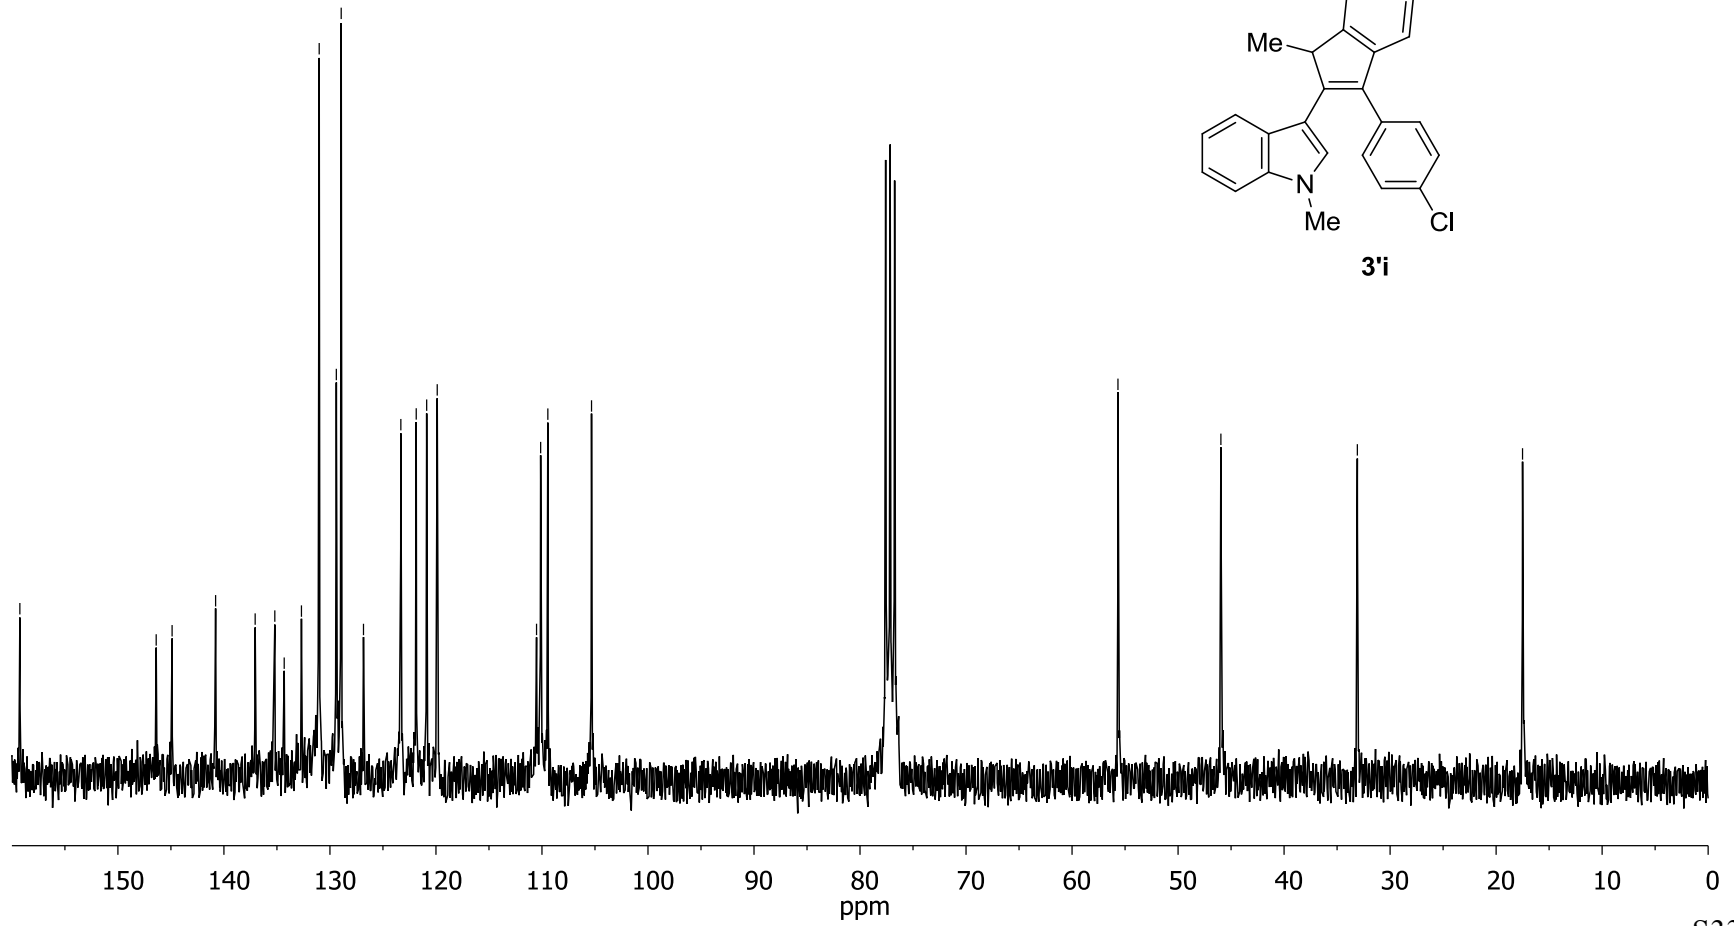

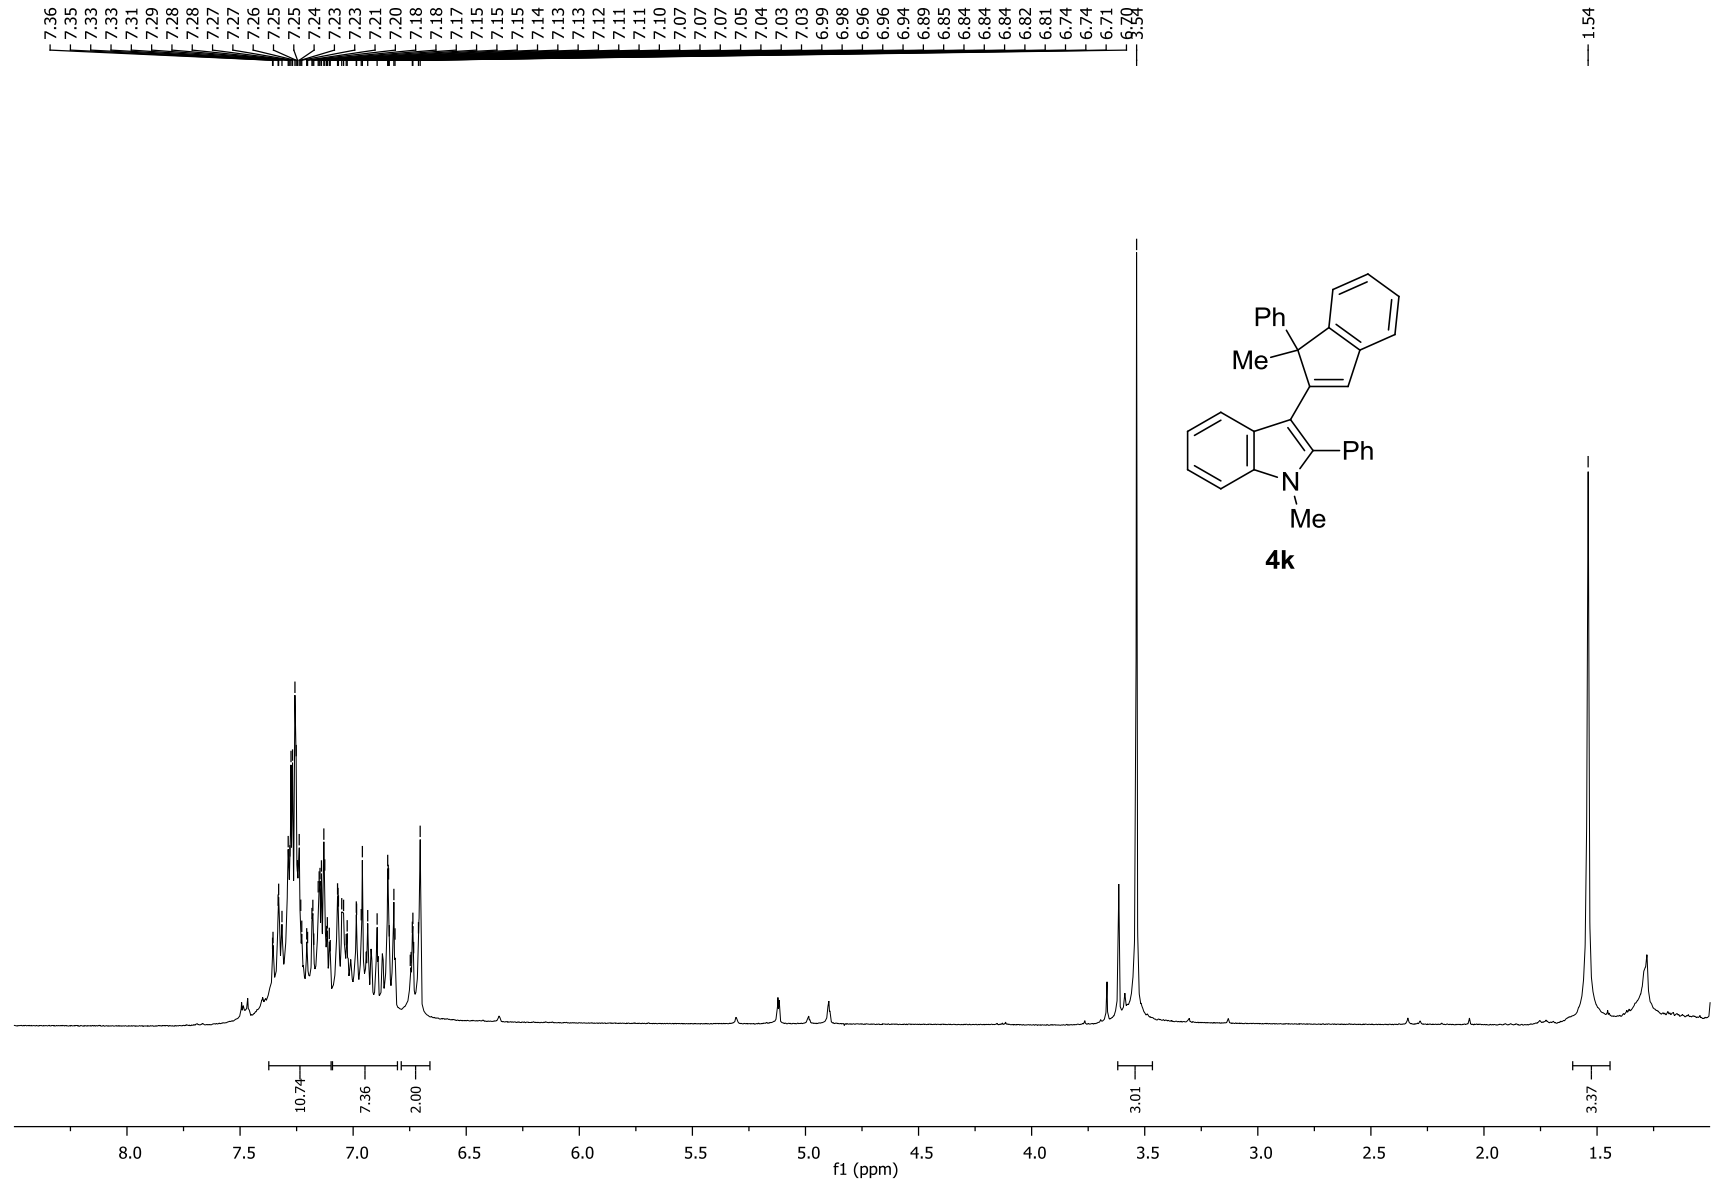

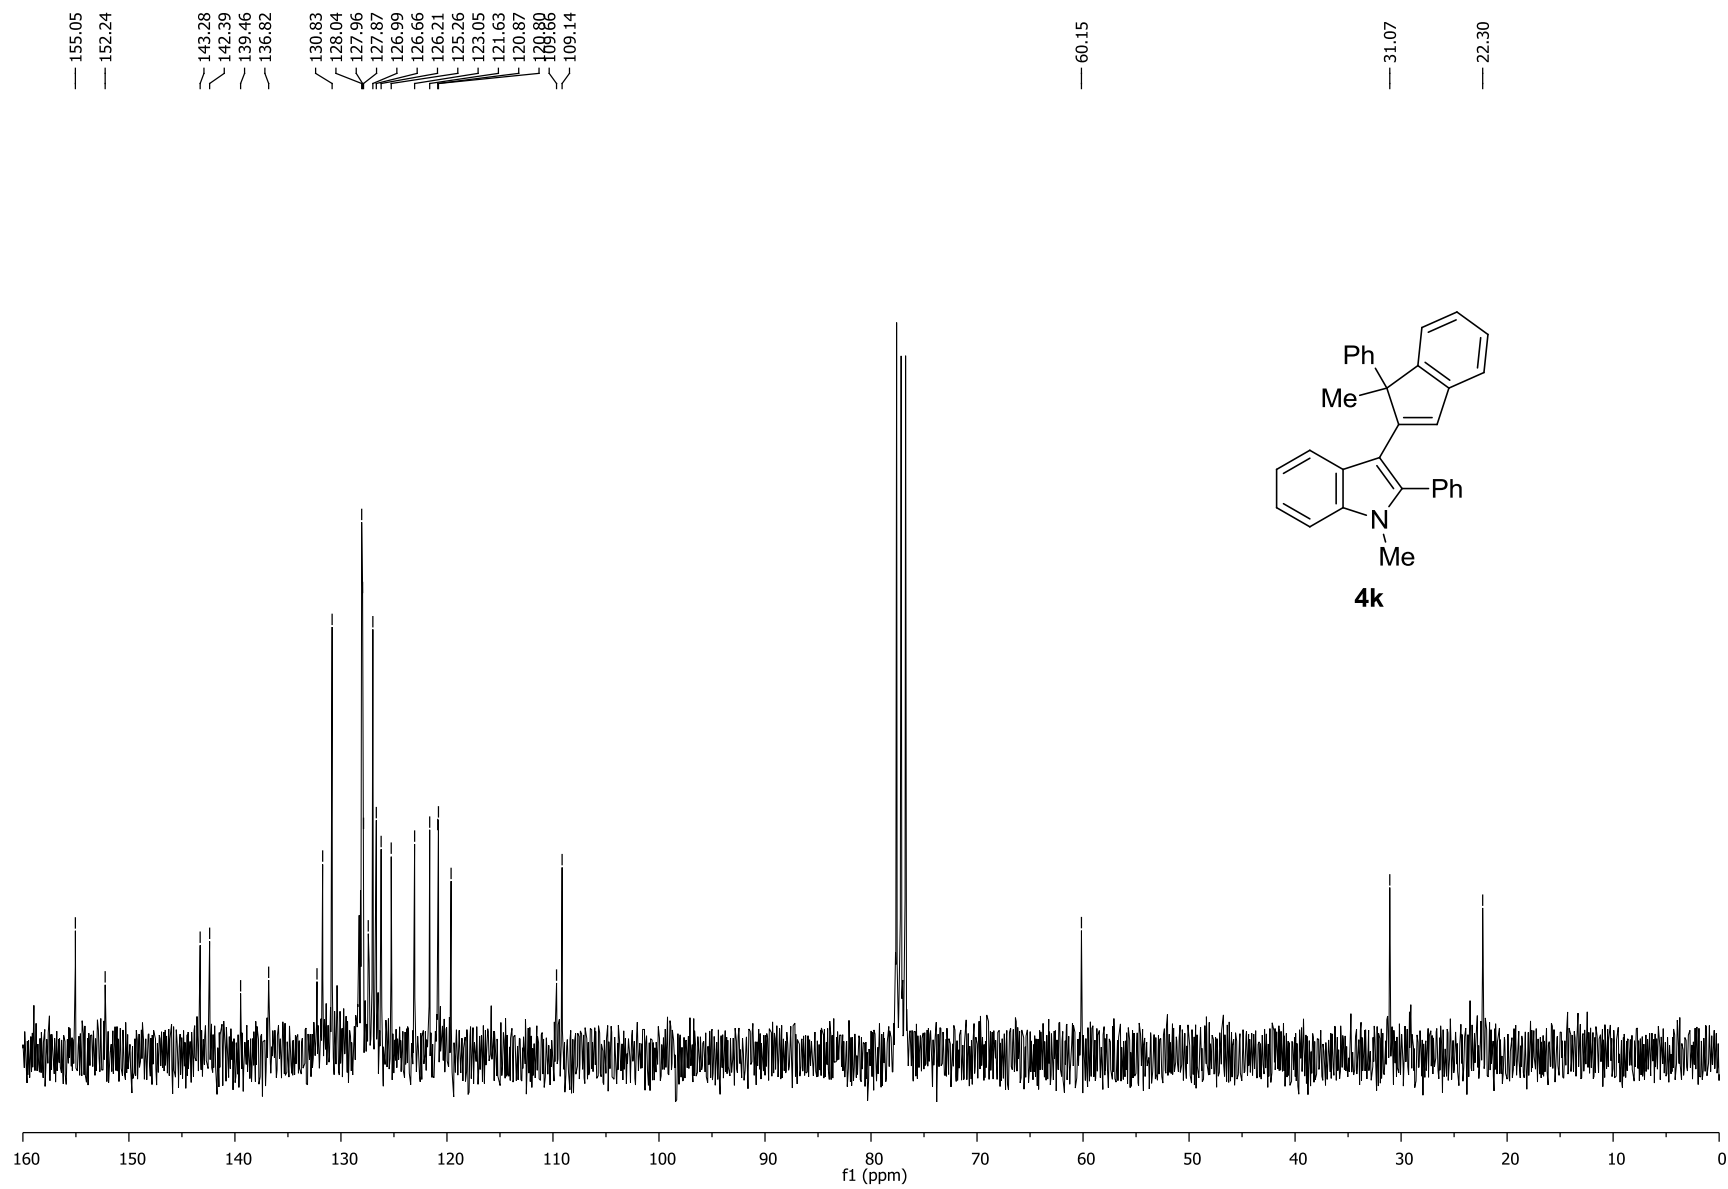

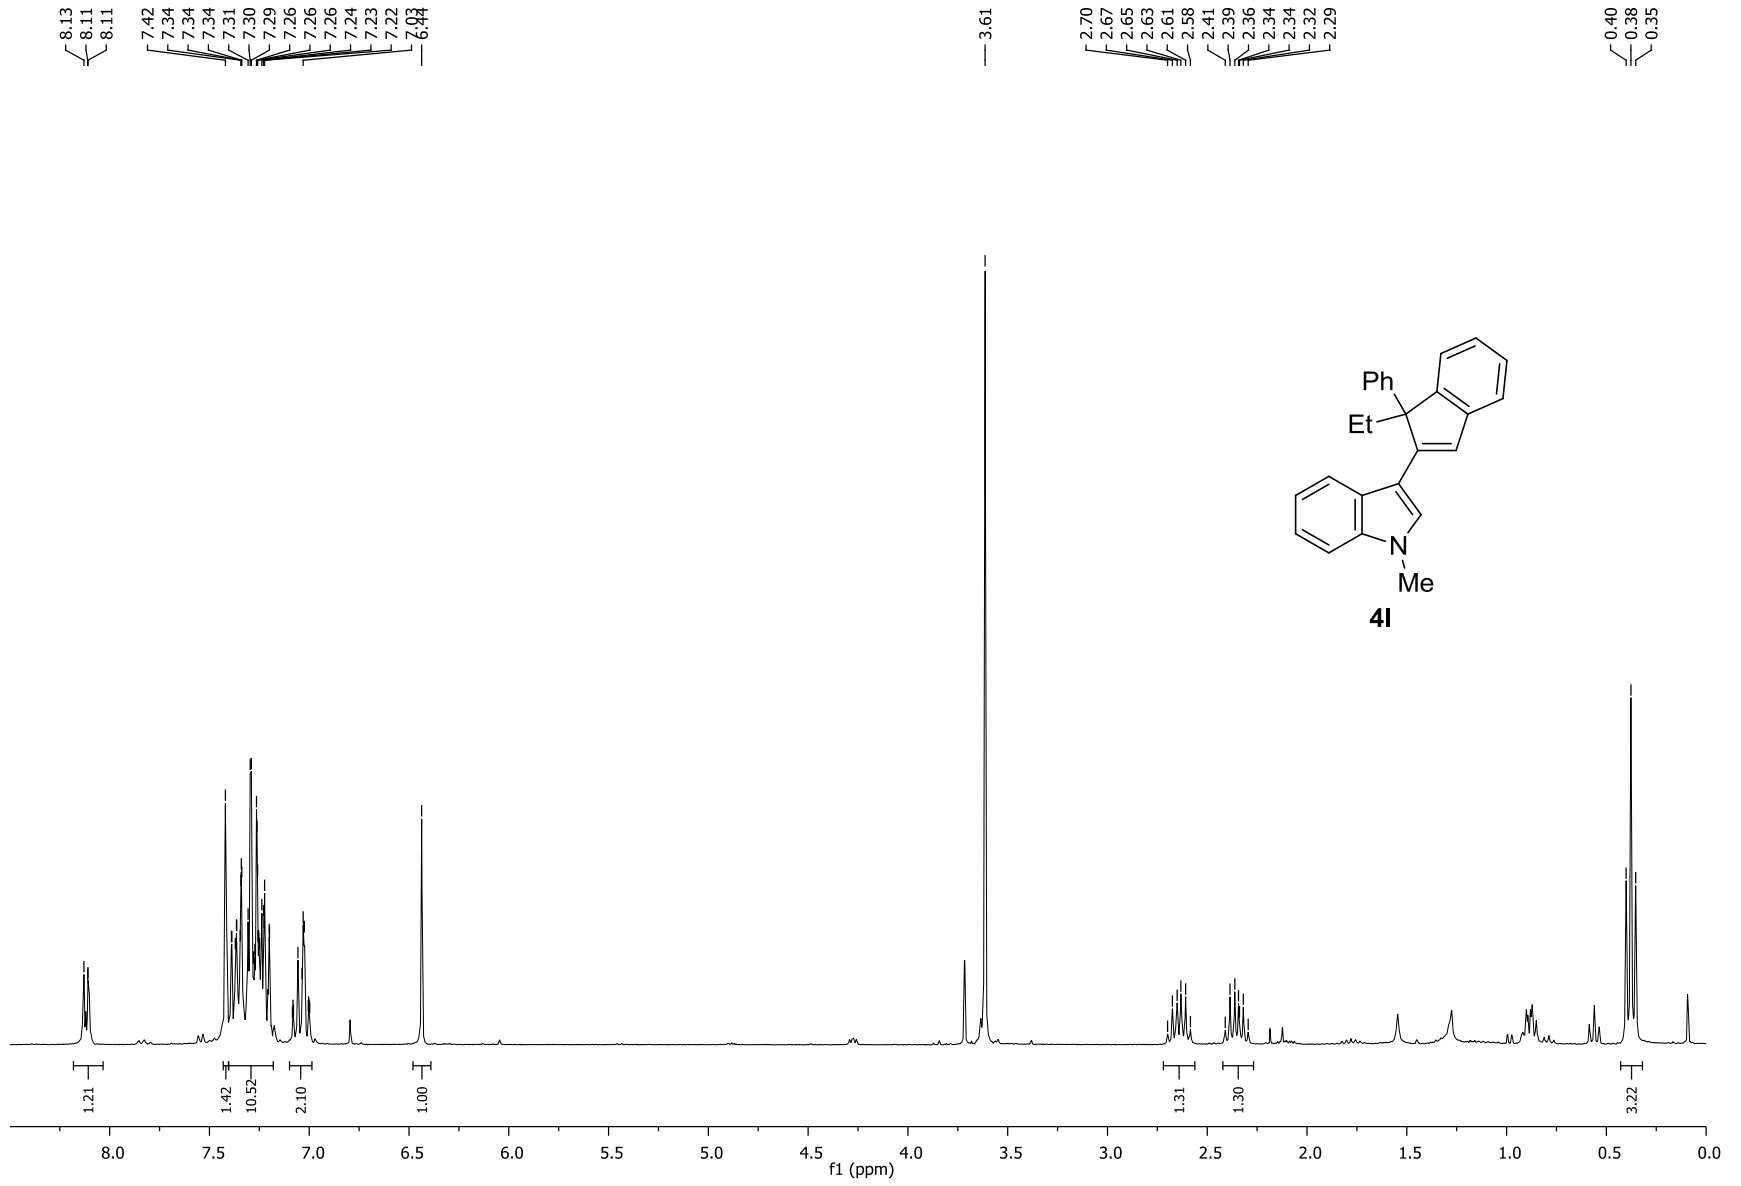

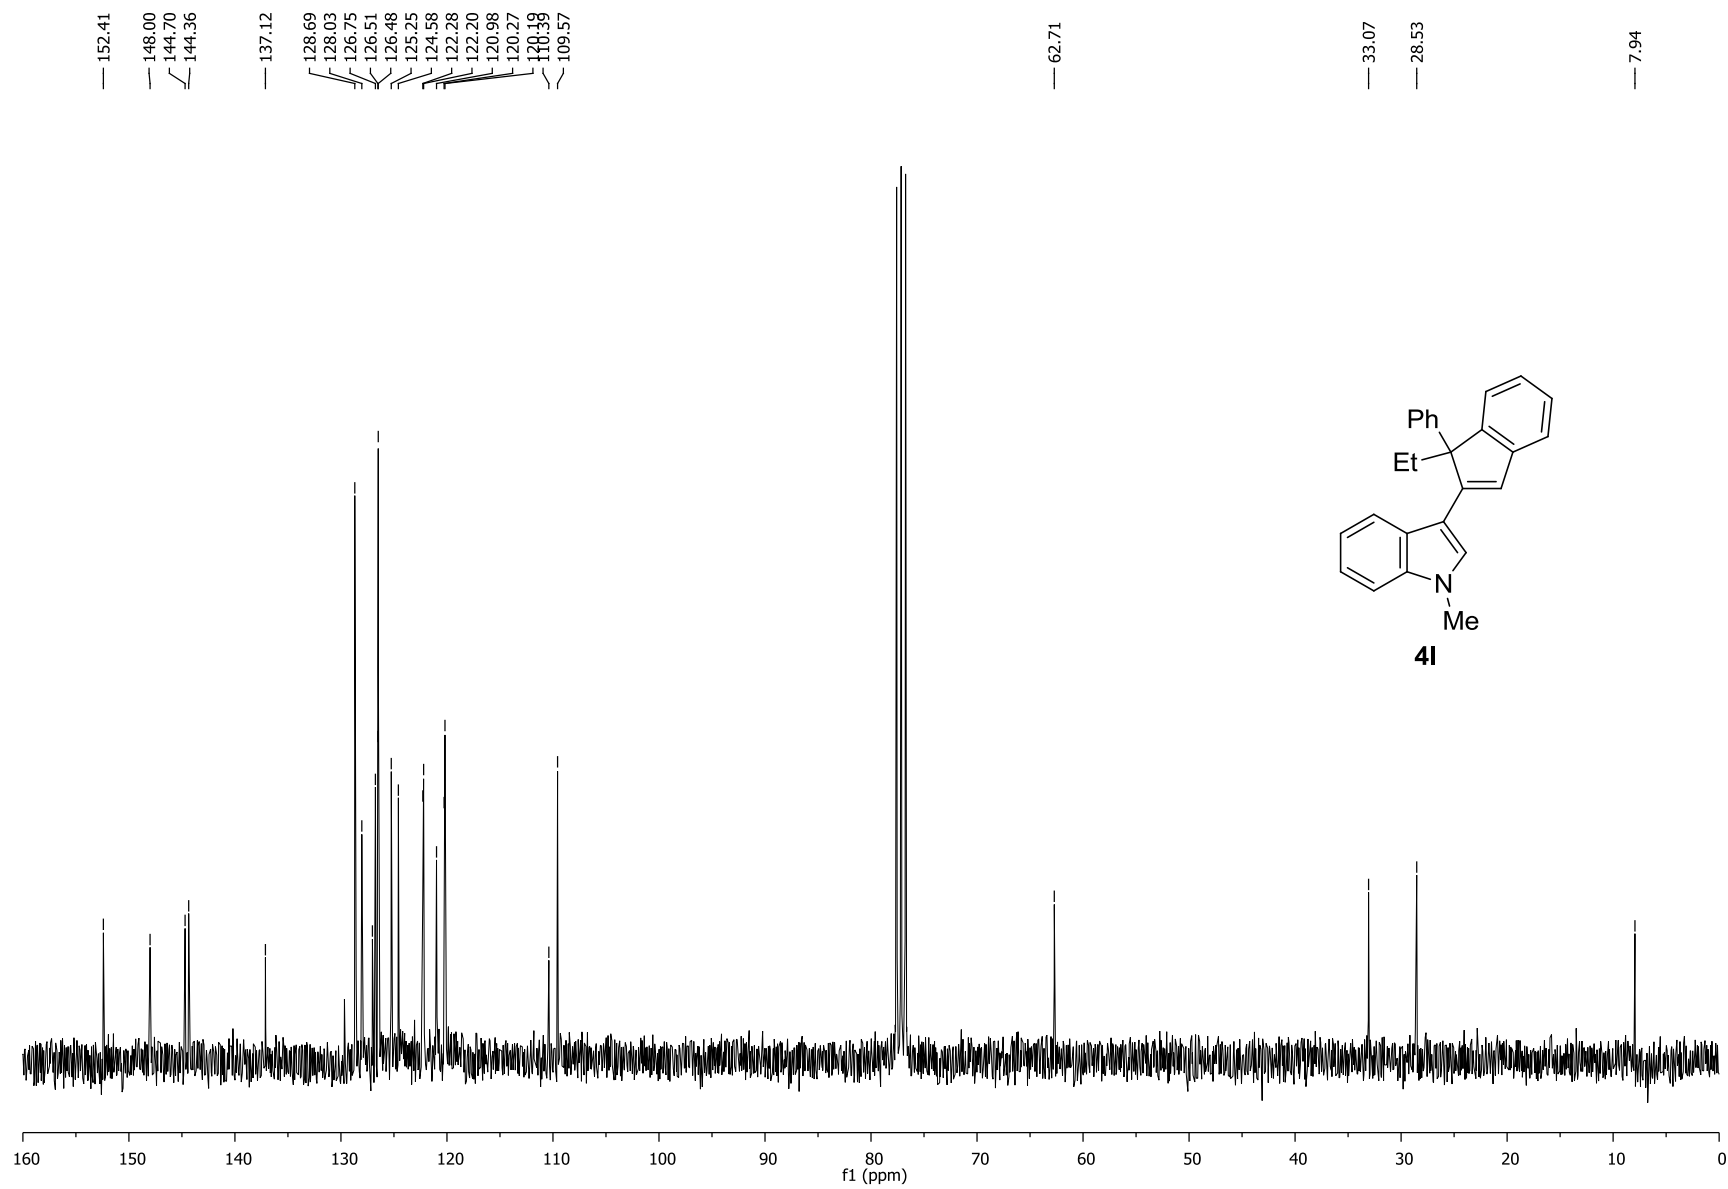

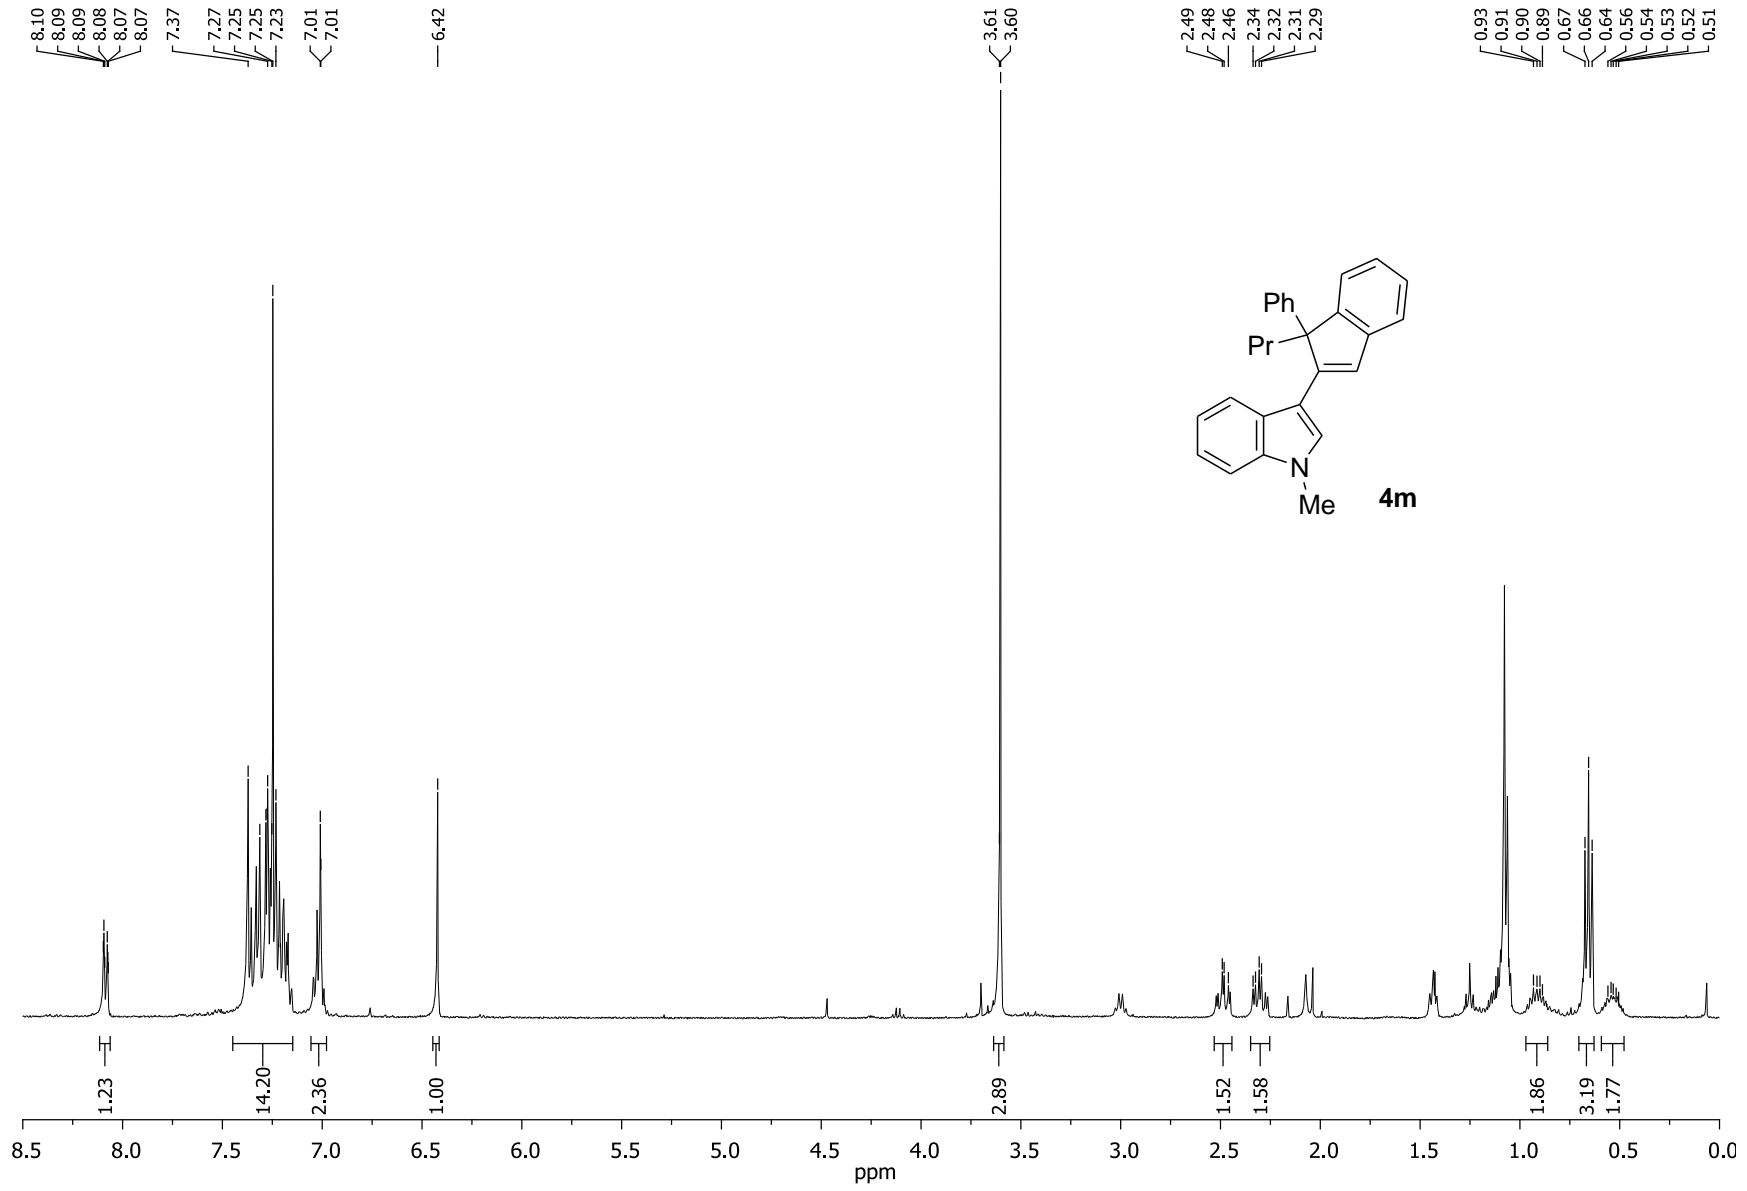

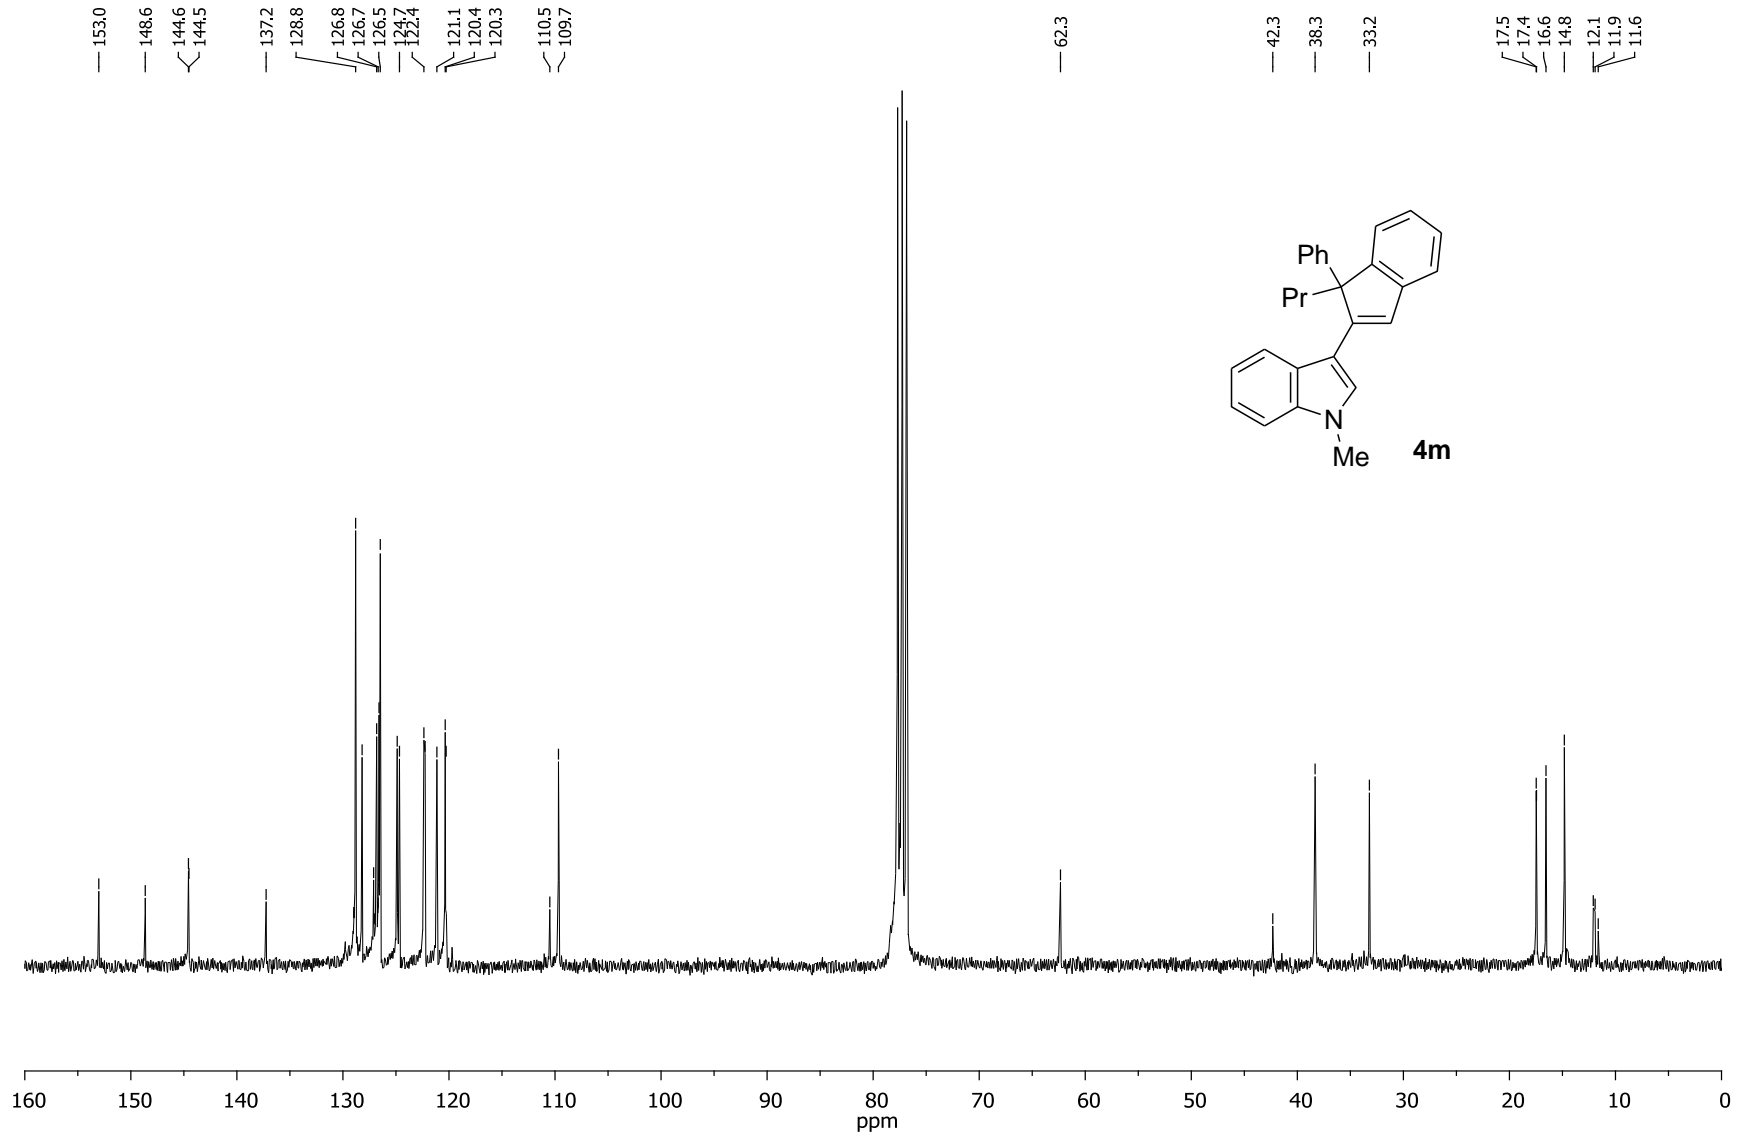

Supplement: Beilstein_J_Org_Chem-07-786-s002.pdf [file Beilstein_J_Org_Chem-07-786-s002.pdf]
