# Supplementary material for: Solvent- and ligand-induced switch of selectivity in gold(I)-catalyzed tandem reactions of 3-propargylindoles
Source: PubMed Central journal article supplement (PMC3135218; doi:10.3762/bjoc.7.89), 2011-06-09
Supplement: Beilstein_J_Org_Chem-07-786-s001.pdf [file Beilstein_J_Org_Chem-07-786-s001.pdf]

# Supporting Information

for

## Solvent- and ligand-induced switch of selectivity in gold(I)-catalyzed tandem reactions of 3- propargylindoles

Estela Álvarez<sup>1</sup>, Delia Miguel<sup>1</sup>, Patricia García-García<sup>1</sup>, Manuel A. Fernández-Rodríguez<sup>1</sup>, Félix Rodríguez<sup>2</sup> and Roberto Sanz<sup>\*1</sup>

Address: <sup>1</sup>Área de Química Orgánica, Departamento de Química, Facultad de Ciencias, Universidad de Burgos, Pza. Misael Bañuelos s/n, 09001 Burgos, Spain and <sup>2</sup>Instituto Universitario de Química Organometálica “Enrique Moles”, Universidad de Oviedo, C/Julián Clavería 8, 33006 Oviedo, Spain

Email: Roberto Sanz - [rsd@ubu.es](mailto:rsd@ubu.es)

\*Corresponding author

### Experimental and analytical data

**General procedure 1 (GP1) for the synthesis of starting 3-propargylindoles 1:** *p*-Toluenesulfonic acid (5 mol %) was added to a mixture of the corresponding alkynol (1.2 equiv) and *N*-methylindole (1 equiv) in analytical-grade MeCN (~1 mL/mmol). The reaction mixture was stirred at room temperature until the starting *N*-methylindole had been consumed, as determined by GC-MS and/or TLC. The crude reaction mixture was neutralized by the addition of 1 M NaOH. The mixture was extracted with Et<sub>2</sub>O (3 × 10 mL) and the combined organic layers were dried with anhydrous Na<sub>2</sub>SO<sub>4</sub>. The solvent was removed under reduced pressure and the residue purified by silica gel column chromatography (eluent: mixtures of hexane/Et<sub>2</sub>O or hexane/AcOEt) to afford the corresponding 3-alkylated indoles **1**. Analytical data for compounds **1a-e** and **1j-n** have been previously described by us [1].

**3-[1-(4-Chlorophenyl)-1-methyl-3-thiophen-3-yl-prop-2-ynyl]-  
1-methyl-1*H*-indole (1f)**

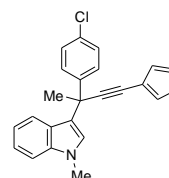

Following **GP1** from 2-(4-chlorophenyl)-4-thiophen-3-yl-but-3-yn-2-ol (1.068 g, 4 mmol) as the alkynol and purification by column chromatography (hexane/AcOEt, 10:1), **1f** was obtained as a pale brown solid (1.101 g, 89%). *R<sub>f</sub>* 0.18 (hexane/AcOEt, 5:1). M.p. 50–52 °C. <sup>1</sup>H NMR (400 MHz, CDCl<sub>3</sub>): δ 2.13 (s, 3H, CH<sub>3</sub>C), 3.80 (s, 3H, CH<sub>3</sub>N), 7.01–7.09 (m, 2H, ArH), 7.14–7.17 (m, 1H, ArH), 7.22–7.36 (m, 5H, ArH), 7.42–7.45 (m, 1H, ArH), 7.49–7.51 (m, 1H, ArH), 7.56–7.61 (m, 2H, ArH) ppm. <sup>13</sup>C NMR (75 MHz, CDCl<sub>3</sub>) δ 31.1 (CH<sub>3</sub>), 32.9 (CH<sub>3</sub>), 39.6 (C), 78.4 (C), 94.1 (C), 109.4 (CH), 119.1 (CH), 119.6 (C), 121.1 (CH), 121.8 (CH), 122.6 (C), 125.1 (CH), 126.0 (C), 126.3 (CH), 182.2 (CH), 182.2 (2 × CH), 182.3 (2 × CH), 130.2 (CH), 132.3 (C), 137.9 (C), 145.0 (C) ppm. LRMS (70 eV, EI): *m/z* (%) 377 [(M+2)<sup>+</sup>, 17], 375 (M<sup>+</sup>, 41),

362 (37), 360 (100), 340 (23), 264 (12). HRMS calcd for C<sub>23</sub>H<sub>18</sub>ClNS, 375.0848; found, 375.0850.

**3-[1-(4-Chlorophenyl)-3-(4-methoxyphenyl)-1-methylprop-2-ynyl]-1-methyl-1*H*-indole (1g)**

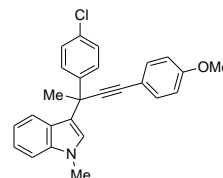

Following **GP1** from 2-(4-chlorophenyl)-4-(4-methoxyphenyl)-but-3-yn-2-ol (1.424 g, 4.9 mmol) as the alkynol and purification by column chromatography (hexane/AcOEt, 20:1), **1g** was obtained as a pale yellow solid (1.086 g, 72%). *R<sub>f</sub>* 0.11 (hexane/AcOEt, 20:1). M.p. 58–60 °C. <sup>1</sup>H NMR (400 MHz, CDCl<sub>3</sub>): δ 2.08 (s, 3H, CH<sub>3</sub>C), 3.78 (s, 3H, XCH<sub>3</sub>), 3.79 (s, 3H, XCH<sub>3</sub>), 6.80–6.86 (m, 2H, ArH), 6.97–7.03 (m, 1H, ArH), 7.03–7.07 (m, 1H, ArH), 7.17–7.24 (m, 1H, ArH), 7.24–7.34 (m, 3H, ArH), 7.35–7.42 (m, 2H, ArH), 7.45–7.51 (m, 1H, ArH), 7.52–7.59 (m, 2H, ArH) ppm. <sup>13</sup>C NMR (75.4 MHz, CDCl<sub>3</sub>): δ 31.2 (CH<sub>3</sub>), 32.8 (CH<sub>3</sub>), 39.5 (C), 55.3 (CH<sub>3</sub>), 83.1 (C), 93.0 (C), 109.4 (CH), 113.8 (2 × CH), 115.8 (C), 119.0 (CH), 119.8 (C), 121.1 (CH), 121.8 (CH), 126.0 (C), 126.2 (CH), 128.2 (2 × CH), 128.2 (2 × CH), 132.1 (C), 133.1 (2 × CH) 137.9 (C), 145.3 (C), 159.3 (C) ppm. LRMS (70 eV, EI): *m/z* (%) 401 [(M+2)<sup>+</sup>, 24], 399 (M<sup>+</sup>, 66), 386 (36), 384 (100), 364 (28), 288 (10). HRMS calcd for C<sub>26</sub>H<sub>22</sub>ClNO, 399.1390; found, 399.1382.

**3-[4-(4-Chlorophenyl)-2-phenylbut-3-yn-2-yl]-1-methyl-1*H*-indole (1h)**

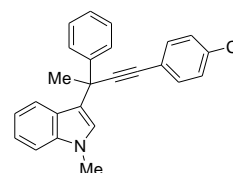

Following **GP1** from 4-(4-chlorophenyl)-2-phenylbut-3-yn-2-ol (0.150 g, 0.58 mmol) as the alkynol and purification by column chromatography (hexane/AcOEt, 20:1), **1h** was obtained as a white solid (0.145 g, 80%). *R<sub>f</sub>* 0.25 (hexane/AcOEt, 10:1). M.p. 122–124 °C. <sup>1</sup>H NMR (300 MHz, CDCl<sub>3</sub>): δ 2.13 (s, 3H CH<sub>3</sub>C), 3.80 (s, 3H, NCH<sub>3</sub>),

6.96–7.07 (m, 2H, ArH), 7.17–7.46 (m, 9H, ArH), 7.47–7.55 (m, 1H, ArH), 7.58–7.66 (m, 2H, ArH) ppm.  $^{13}\text{C}$  NMR (75.4 MHz,  $\text{CDCl}_3$ ):  $\delta$  31.1 ( $\text{CH}_3$ ), 32.9 ( $\text{CH}_3$ ), 40.00 (C), 82.0 (C), 96.3 (C), 109.4 (CH), 119.0 (CH), 120.0 (C), 121.2 (CH), 121.8 (CH), 122.5 (C), 126.2 (C), 126.3 (CH), 126.6 (CH), 126.7 (2  $\times$  CH), 128.3 (2  $\times$  CH), 128.5 (2  $\times$  CH), 133.0 (2  $\times$  CH) 133.7 (C), 137.9 (C), 146.1 (C) ppm. LRMS (70 eV, EI):  $m/z$  (%) 371  $[(\text{M}+2)^+$ , 19], 369 ( $\text{M}^+$ , 53), 356 (36), 354 (100), 292 (10), 241 (12). HRMS calcd for  $\text{C}_{25}\text{H}_{20}\text{ClN}$ , 369.1284; found, 369.1280.

**3-[3-(4-Chlorophenyl)-1-(4-methoxyphenyl)-1-methylprop-2-ynyl]-1-methyl-1*H*-indole (1i)**

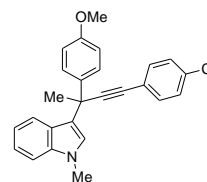

Following **GP1** from 4-(4-chlorophenyl)-2-(4-methoxyphenyl)-but-3-yn-2-ol (2.148 g, 7.5 mmol) as the alkynol and purification by column chromatography (hexane/AcOEt, 10:1), **1i** was obtained as a pale orange solid (1.825 g, 74%).  $R_f$  0.16 (hexane/AcOEt, 20:1). M.p. 60–62 °C.  $^1\text{H}$  NMR (400 MHz,  $\text{CDCl}_3$ ):  $\delta$  2.10 (s, 3H,  $\text{CH}_3\text{C}$ ), 3.77 (s, 3H,  $\text{XCH}_3$ ), 3.79 (s, 3H,  $\text{XCH}_3$ ), 6.83–6.90 (m, 2H, ArH), 6.97–7.06 (m, 2H, ArH), 7.17–7.34 (m, 4H, ArH), 7.34–7.42 (m, 2H, ArH), 7.48–7.56 (m, 3H, ArH) ppm.  $^{13}\text{C}$  NMR (75.4 MHz,  $\text{CDCl}_3$ ):  $\delta$  31.2 ( $\text{CH}_3$ ), 32.9 ( $\text{CH}_3$ ), 39.3 (C), 55.3 ( $\text{CH}_3$ ), 81.7 (C), 96.5 (C), 109.4 (CH), 113.5 (2  $\times$  CH), 119.0 (CH), 120.3 (C), 121.3 (CH), 121.7 (CH), 122.5 (C), 126.1 (C), 126.3 (CH), 127.8 (2  $\times$  CH), 128.5 (2  $\times$  CH), 133.0 (2  $\times$  CH), 133.7 (C), 137.9 (C), 138.3 (C), 158.2 (C) ppm. LRMS (70 eV, EI):  $m/z$  (%) 401  $[(\text{M}+2)^+$ , 29], 399 ( $\text{M}^+$ , 81), 386 (36), 384 (100), 340 (11). HRMS calcd for  $\text{C}_{26}\text{H}_{22}\text{ClNO}$ , 399.1390; found, 399.1390.

**General procedure 2 (GP2) for the standard gold-catalyzed reaction of 3-propargylindoles 1. Synthesis of indole derivatives 3a and 3c:** To a stirred mixture of (Ph<sub>3</sub>P)AuCl (12.4 mg, 0.025 mmol, 5 mol%) and AgSbF<sub>6</sub> (8.6 mg, 0.025 mmol, 5 mol%) in analytical grade CH<sub>2</sub>Cl<sub>2</sub> (1 mL), the corresponding 3-propargylindole **1a,c** (0.5 mmol) was added at rt. The resulting reaction mixture was stirred at rt until complete conversion to the corresponding 3-(inden-2-yl)indoles **3** and/or **4** (monitored by GC-MS and/or TLC). After the removal of the solvent, the purification and isolation of major isomers **3a** and **3c** was accomplished by silica gel column chromatography (hexane/Et<sub>2</sub>O, 50:1).

**1-Methyl-3-(3-methyl-1-phenyl-1H-inden-2-yl)-1H-indole (3a)**

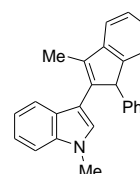

Following **GP2** from **1a** (167 mg, 0.5 mmol) as the starting 3-propargylindole a ca. 3.5:1 mixture of **3a:4a** was obtained. Indole derivative **3a** was isolated as a white solid (100 mg, 60%). M.p. 186–188 °C. <sup>1</sup>H NMR (300 MHz, CDCl<sub>3</sub>): δ 2.32 (s, 3H, CH<sub>3</sub>C=), 3.68 (s, 3H, NCH<sub>3</sub>), 4.96 (s, 1H, PhCH), 6.68 (s, 1H, =CH), 7.10–7.28 (m, 10H, ArH), 7.36 (td, *J* = 7.5, 1.3 Hz, 1H, ArH), 7.40–7.45 (m, 1H, ArH), 7.62–7.72 (m, 1H, ArH) ppm. <sup>13</sup>C NMR (75.4 MHz, CDCl<sub>3</sub>): δ 12.7 (CH<sub>3</sub>), 32.8 (CH<sub>3</sub>), 58.9 (CH), 109.4 (CH), 111.3 (C), 118.7 (CH), 119.4 (CH), 120.9 (CH), 121.7 (CH), 123.6 (CH), 124.9 (CH), 126.5 (CH), 126.9 (CH), 127.5 (C), 128.0 (CH), 128.4 (2 × CH), 128.5 (2 × CH), 134.5 (C), 136.8 (C), 139.4 (C), 140.7 (C), 146.6 (C), 148.4 (C) ppm. LRMS (70 eV, EI): *m/z* (%) 335 (M<sup>+</sup>, 100), 320 (77), 304 (16). HRMS calcd for C<sub>25</sub>H<sub>21</sub>N, 335.1674; found, 335.1684.

### 3-(6-Chloro-3-methyl-1-phenyl-1*H*-inden-2-yl)-1*H*-indole (3c)

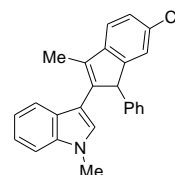

Following **GP2** from **1c** (185 mg, 0.5 mmol) as the starting 3-propargylindole a ca. 2.2:1 mixture of **3c:4c** was obtained. Indole derivative **3c** was isolated as a white solid (94 mg, 51%). M.p. 118–120 °C. <sup>1</sup>H NMR (400 MHz, CDCl<sub>3</sub>): δ 2.35 (s, 3H, CH<sub>3</sub>C=), 3.63 (s, 3H, NCH<sub>3</sub>), 4.99 (s, 1H, PhCH), 6.73 (s, 1H, =CH), 7.13–7.25 (m, 7H, ArH), 7.28 (d, *J* = 3.6 Hz, 2H, ArH), 7.33 (d, *J* = 8.0 Hz, 1H, ArH), 7.37 (dd, *J* = 8.0, 1.8 Hz, 1H, ArH), 7.72 (d, *J* = 7.9 Hz, 1H, ArH) ppm. <sup>13</sup>C NMR (100.6 MHz, CDCl<sub>3</sub>): δ 12.7 (CH<sub>3</sub>), 32.8 (CH<sub>3</sub>), 58.7 (CH), 109.5 (CH), 110.9 (C), 119.47 (CH), 119.53 (CH), 120.8 (CH), 121.8 (CH), 124.0 (CH), 126.8 (CH), 127.0 (CH), 127.3 (C), 128.1 (CH), 128.3 (2 × CH), 128.6 (2 × CH), 130.6 (C), 133.6 (C), 136.7 (C), 139.8 (C), 139.9 (C), 145.1 (C), 149.9 (C) ppm. LRMS (70 eV, EI): *m/z* (%) 371 [(M+2)<sup>+</sup>, 33], 369 (M<sup>+</sup>, 100), 354 (76), 334 (14). HRMS calcd for C<sub>25</sub>H<sub>20</sub>ClN, 369.1284; found, 369.1286.

**General procedure 3 (GP3) for the (triarylphosphite)gold-catalyzed reaction of 3-propargylindoles 1. Synthesis of indole derivatives 3 and 4:** To a stirred mixture of [(2,4-(*t*-Bu)<sub>2</sub>C<sub>6</sub>H<sub>3</sub>O)<sub>3</sub>P]AuCl (5 mol%) and AgOTf (5 mol%) in analytical grade toluene (2 mL/mmol), the corresponding 3-propargylindole **1** (1 equiv.) was added at 0 °C. The resulting mixture was stirred at 0 °C until complete conversion (monitored by GC-MS and/or TLC). After filtration through a short pad of celite (elution with hexane/AcOEt 5:1), the solvent was removed under reduced pressure and the residue purified by silica gel column chromatography (hexane/Et<sub>2</sub>O or

hexane/AcOEt) to afford 3-(inden-2-yl)indoles **3** and/or **4**. Compounds **3b** and **3j-n** have been reported in our previous work [2,3].

### 1-Methyl-3-(1-methyl-1-phenyl-1*H*-inden-2-yl)-1*H*-indole (**4a**)

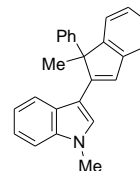

Following **GP3** from **1a** (150 mg, 0.45 mmol) as the starting 3-propargylindole a ca. 2.3:1 mixture of **4a:3a** was obtained. Indole derivative **4a** was isolated by column chromatography (hexane/ AcOEt, 50:1) as a white solid (90 mg, 60%). M.p. 138–140 °C. <sup>1</sup>H NMR (400 MHz, CDCl<sub>3</sub>): δ 1.80 (s, 3H, CH<sub>3</sub>C), 3.61 (s, 3H, NCH<sub>3</sub>), 6.43 (s, 1H, =CH), 7.05–7.08 (m, 2H, ArH), 7.19–7.35 (m, 9H, ArH), 7.37 (s, 1H, =CH), 7.43 (d, *J* = 7.4 Hz, 1H, ArH), 8.09–8.13 (m, 1H, ArH) ppm. <sup>13</sup>C NMR (100.6 MHz, CDCl<sub>3</sub>): δ 23.7 (CH<sub>3</sub>), 33.1 (CH<sub>3</sub>), 58.3 (C), 109.6 (CH), 110.2 (C), 120.4 (CH), 120.6 (CH), 121.1 (CH), 122.3 (2 × CH), 123.1 (CH), 124.7 (CH), 126.3 (2 × CH), 126.5 (CH), 126.8 (CH), 127.2 (C), 128.3 (C), 128.7 (2 × CH), 137.2 (C), 143.2 (C), 143.8 (C), 150.9 (C), 154.6 (C) ppm. IR (KBr): ν 2964, 1465, 1455, 1372, 1332, 699 cm<sup>-1</sup>. LRMS (70 eV, EI): *m/z* (%) 335 (M<sup>+</sup>, 100), 320 (79), 304 (12). HRMS calcd for C<sub>25</sub>H<sub>21</sub>N, 335.1674; found, 335.1680.

### 3-(1-Methyl-1-phenyl-1*H*-inden-2-yl)-1*H*-indole (**4b**)

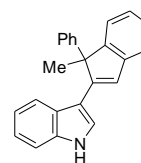

Following **GP3** from **1b** (95 mg, 0.29 mmol) as the starting 3-propargylindole a ca. 1.8:1 mixture of **4b:3b** was obtained. Indole derivative **4b** was isolated by column chromatography (hexane/Et<sub>2</sub>O, 20:1) as a white-grey solid (36 mg, 38%). M.p. 183–185 °C. <sup>1</sup>H NMR (300 MHz, CDCl<sub>3</sub>): δ 1.81 (s, 3H, CH<sub>3</sub>C), 6.57 (s, 1H, =CH), 7.09 (d, *J* = 4.2 Hz, 1H, ArH), 7.19–7.51 (m, 12H, ArH), 7.93 (s, 1H, NH), 8.09–8.18

(m, 1H, ArH) ppm.  $^{13}\text{C}$  NMR (75.4 MHz,  $\text{CDCl}_3$ ):  $\delta$  23.7 ( $\text{CH}_3$ ), 58.6 (C), 111.6 (CH), 111.9 (CH), 120.9 ( $2 \times \text{CH}$ ), 121.1 (CH), 122.5 (CH), 122.9 (CH), 123.8 (C), 123.9 (CH), 125.0 (CH), 126.5 ( $2 \times \text{CH}$ ), 126.7 (CH), 127.2 (CH), 128.7 (C), 128.8 ( $2 \times \text{CH}$ ), 136.4 (C), 143.3 (C), 144.0 (C), 151.0 (C), 154.7 (C) ppm. LRMS (70 eV, EI):  $m/z$  (%) 321 ( $\text{M}^+$ , 100), 306 (55), 304 (22), 244 (9). HRMS calcd for  $\text{C}_{24}\text{H}_{19}\text{N}$ , 321.1517; found, 321.1519.

**3-[1-(4-Chlorophenyl)-1-methyl-1*H*-inden-2-yl]-1-methyl-1*H*-indole (4c)**

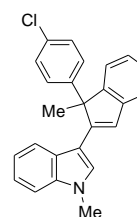

Following **GP3** from **1c** (169 mg, 0.45 mmol) as the starting 3-propargylindole a ca. 3:1 mixture of **4c:3c** was obtained. Indole derivative **4c** was isolated by column chromatography (hexane/AcOEt, 50:1) as a yellow foam (113 mg, 67%).  $R_f$  0.26 (hexane/ AcOEt, 5:1).  $^1\text{H}$  NMR (400 MHz,  $\text{CDCl}_3$ ):  $\delta$  1.80 (s, 3H,  $\text{CH}_3\text{C}$ ), 3.65 (s, 3H,  $\text{NCH}_3$ ), 6.46 (s, 1H, =CH), 7.05 (d,  $J = 7.1$  Hz, 1H, ArH), 7.09 (dt,  $J = 7.3, 0.8$  Hz, 1H, ArH), 7.21–7.30 (m, 6H, ArH), 7.32–7.35 (m, 2H, ArH), 7.39 (s, 1H, =CH), 7.45 (d,  $J = 7.4$  Hz, 1H, ArH), 8.12 (d,  $J = 6.7$  Hz, 1H, ArH) ppm.  $^{13}\text{C}$  NMR (100.6 MHz,  $\text{CDCl}_3$ ):  $\delta$  23.7 ( $\text{CH}_3$ ), 33.1 ( $\text{CH}_3$ ), 57.9 (C), 109.7 (CH), 110.0 (C), 120.5 (CH), 120.7 (CH), 121.1 (CH), 122.2 (CH), 122.5 (CH), 123.3 (CH), 124.8 (CH), 127.1 (CH), 127.8 ( $2 \times \text{CH}$ ), 128.1 (CH), 128.9 ( $2 \times \text{CH}$ ), 132.3 (C), 137.2 (C), 142.7 (C), 143.1 (C), 150.4 (C), 154.0 (C) ppm. LRMS (70 eV, EI):  $m/z$  (%) 371 [ $(\text{M}+2)^+$ , 15), 369 ( $\text{M}^+$ , 45), 354 (100), 334 (32). HRMS calcd for  $\text{C}_{25}\text{H}_{20}\text{ClN}$ , 369.1284; found, 369.1281.



**3-[1-(2-Bromophenyl)-1-methyl-1*H*-inden-2-yl]-1-methyl-1*H*-indole (4d)**

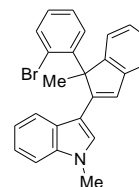

Following **GP3** from **1d** (100 mg, 0.24 mmol) as the starting 3-propargylindole a ca. >10:1 mixture of **4d:3d** was obtained. Indole derivative **4d** was isolated by column chromatography (hexane/AcOEt, 20:1) as a white solid (86 mg, 86%). M.p. 164–166 °C. <sup>1</sup>H NMR (400 MHz, CDCl<sub>3</sub>): δ 1.87 (s, 3H, CH<sub>3</sub>C), 3.58 (s, 3H, NCH<sub>3</sub>), 6.36 (s, 1H, =CH), 7.03 (d, *J* = 7.3 Hz, 1H, ArH), 7.18–7.25 (m, 2H, ArH), 7.30–7.40 (m, 4H, ArH), 7.44 (s, 1H, =CH), 7.52–7.56 (m, 3H, ArH), 8.02 (d, *J* = 7.7 Hz, 1H, ArH), 8.20–8.22 (m, 1H, ArH) ppm. <sup>13</sup>C NMR (100.6 MHz, CDCl<sub>3</sub>): δ 29.2 (CH<sub>3</sub>), 33.0 (CH<sub>3</sub>), 59.7 (C), 109.5 (CH), 110.8 (C), 120.3 (CH), 120.9 (CH), 121.2 (CH), 121.4 (CH), 122.3 (CH), 124.1 (CH), 124.5 (CH), 124.7 (C), 126.8 (CH), 127.2 (CH + C), 127.3 (CH), 128.6 (CH), 129.9 (CH), 135.3 (CH), 137.2 (C), 142.5 (C), 145.1 (C), 149.3 (C), 151.7 (C) ppm. LRMS (70 eV, EI): *m/z* (%) 415 [(M+2)<sup>+</sup>, 98], 413 (M<sup>+</sup>, 100), 334 (36), 319 (48). HRMS calcd for C<sub>25</sub>H<sub>20</sub>BrN, 413.0779; found, 413.0770.

**1-Methyl-3-(6-methyl-6-phenyl-6*H*-cyclopenta[*b*]thiophen-5-yl)-1*H*-indole (4e)**

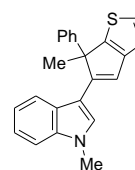

Following **GP3** from **1e** (300 mg, 0.87 mmol) as the starting 3-propargylindole a ca. 3:1 mixture of **4e:3e** was obtained. Indole derivative **4e** was isolated by column chromatography (hexane/Et<sub>2</sub>O, 80:1) as a white solid (185 mg, 62%). M.p. 130–132 °C. <sup>1</sup>H NMR (400 MHz, CDCl<sub>3</sub>): δ = 1.83 (s, 3H, CH<sub>3</sub>C), 3.60 (s, 3H, NCH<sub>3</sub>), 6.37 (s, 1H, =CH), 7.03 (d, *J* = 4.9, 1H, ArH), 7.18–7.37 (m, 10H, ArH), 8.00 (d, *J* = 7.8, 1H, ArH) ppm. <sup>13</sup>C NMR (75.4 MHz, CDCl<sub>3</sub>): δ 24.8 (CH<sub>3</sub>), 32.9 (CH<sub>3</sub>), 56.9 (CH), 109.5 (CH), 110.8 (C), 119.3 (CH), 119.5 (CH), 120.1 (CH), 120.9 (CH), 122.2 (CH), 126.3

(2 × CH), 126.8 (CH), 126.8 (C), 127.0 (CH), 127.7 (CH), 128.8 (2 × CH), 137.0 (C), 143.5 (C), 145.9 (C), 153.6 (C), 154.9 (C) ppm. LRMS (70 eV, EI):  $m/z$  (%) 341 ( $M^+$ , 100), 327 (15), 326 (55), 310 (8), 364 (10). HRMS calcd for  $C_{23}H_{19}NS$ , 341.1238; found, 341.1241.

**3-[6-(4-Chlorophenyl)-6-methyl-6*H*-cyclopenta[*b*]thiophen-5-yl]-1-methyl-1*H*-indole (4f)**

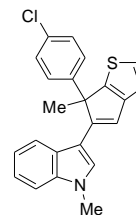

Following **GP3** from **1f** (292 mg, 0.75 mmol) as the starting 3-propargylindole a ca. 4:1 mixture of **4f**:**3f** was obtained. Indole derivative **4f** was isolated by column chromatography (hexane/ $Et_2O$ , 50:1) as a white solid (207 mg, 71%) M.p. 155 °C with decomposition.  $^1H$  NMR (400 MHz,  $CDCl_3$ ):  $\delta$  1.90 (s, 3H,  $CH_3C$ ), 3.66 (s, 3H  $NCH_3$ ), 6.47 (s, 1H =CH, 7.10 (d,  $J = 4.8$  Hz, 1H, ArH), 7.29–7.38 (m, 9H, ArH), 8.07–8.11 (m, 1H, ArH) ppm.  $^{13}C$  NMR (75.4 MHz,  $CDCl_3$ ):  $\delta$  24.7 ( $CH_3$ ), 33.0 ( $CH_3$ ), 56.3 (C), 109.6 (CH), 110.6 (C), 119.4 (CH), 119.7 (CH), 120.2 (CH), 120.9 (CH), 122.4 (CH), 126.7 (C), 126.8 (CH), 127.7 (2 × CH), 128.0 (CH), 128.9 (2 × CH), 132.5 (C), 137.0 (C), 142.3 (C), 146.0 (C), 153.2 (C), 154.3 (C) ppm. LRMS (70 eV, EI):  $m/z$  (%) 377 [ $(M+2)^+$ , 39], 375 ( $M^+$ , 100), 362 (33), 360 (82), 324 (15), 264 (17). HRMS calcd for  $C_{23}H_{18}ClNS$ , 375.0848; found, 375.0846.

**3-(1-(4-Chlorophenyl)-6-methoxy-1-methyl-1*H*-inden-2-yl)-1-methyl-1*H*-indole (4g)**

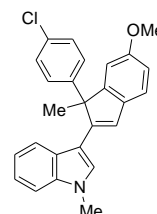

Following **GP3** from **1g** (399.7 mg, 1 mmol) as the starting 3-propargylindole a ca. 3:1 mixture of **4g**:**3g** was obtained. Indole derivative **4g** was isolated by column chromatography (hexane/ $Et_2O$ , 60:1) as a white solid (239 mg, 60%). M.p. 172–174

°C.  $^1\text{H}$  NMR (400 MHz,  $\text{CDCl}_3$ ):  $\delta$  1.78 (s, 3H,  $\text{CH}_3\text{C}$ ), 3.63 (s, 3H,  $\text{NCH}_3$ ), 3.76 (s, 3H,  $\text{OCH}_3$ ), 6.40 (s, 1H, =CH), 6.63 (d,  $J = 2.3$  Hz, 1H, ArH), 6.80 (dd,  $J = 8.2, 2.3$  Hz, 1H, ArH), 7.20–7.35 (m, 9H, ArH), 8.08 (d,  $J = 7.8$  Hz, 1H, ArH). ppm.  $^{13}\text{C}$  NMR (75.4 MHz,  $\text{CDCl}_3$ ):  $\delta$  23.8 ( $\text{CH}_3$ ), 33.0 ( $\text{CH}_3$ ), 55.2 ( $\text{CH}_3$ ), 57.9 (C), 109.3 (C), 109.6 (CH), 110.1 (C), 111.8 (CH), 120.3 (CH), 121.0 (CH), 121.0 (CH), 122.3 (CH), 122.9 (CH), 126.9 (C), 127.5 (CH), 127.2 ( $2 \times \text{CH}$ ), 128.8 ( $2 \times \text{CH}$ ), 132.2 (C), 136.0 (C), 137.1 (C), 142.7 (C), 148.4 (C), 155.9 (C), 157.9 (C) ppm. LRMS (70 eV, EI):  $m/z$  (%) 401  $[(\text{M}+2)^+$ , 36], 399 ( $\text{M}^+$ , 100), 386 (17), 384 (42), 341 (7). HRMS calcd for  $\text{C}_{26}\text{H}_{22}\text{ClNO}$ , 399.1390; found, 399.1397.

**3-(6-Chloro-1-methyl-1-phenyl-1*H*-inden-2-yl)-1-methyl-1*H*-indole (4h) / 3-(1-(4-chlorophenyl)-3-methyl-1*H*-inden-2-yl)-1-methyl-1*H*-indole (3h)**

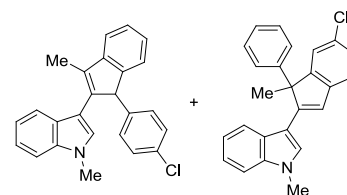

Following **GP3** from **1h** (110 mg, 0.3 mmol) as the starting 3-propargylindole a ca. 1.2:1 mixture of **4h**:**3h** was obtained. The components could not be completely separated by column chromatography (hexane/ $\text{Et}_2\text{O}$ , 50:1). The analytical data reported were obtained from a 1:1 mixture of **4h** and **3h**.  $^1\text{H}$  NMR (300 MHz,  $\text{CDCl}_3$ ):  $\delta$  1.83 (s, 3H,  $\text{CH}_3\text{C}$ , **4h**), 2.33 (s, 3H,  $\text{CH}_3\text{C}=\text{C}$ , **3h**), 3.61 (s, 3H,  $\text{NCH}_3$ , **4h**), 3.73 (s, 3H,  $\text{NCH}_3$ , **3h**), 4.98 (s, 1H,  $\text{PhCH}$ , **3h**), 6.45 (s, 1H, =CH, **4h**), 6.77 (s, 1H, =CH, **3h**), 7.03–7.07 (m, 3H, ArH), 7.13–7.45 (m, 20H, ArH), 7.67–7.70 (m, 1H, ArH), 8.10–8.13 (m, 1H, ArH) ppm.  $^{13}\text{C}$  NMR (75.4 MHz,  $\text{CDCl}_3$ ):  $\delta$  12.7 ( $\text{CH}_3$ , **3h**), 23.6 ( $\text{CH}_3$ , **4h**), 32.95 ( $\text{CH}_3$ ), 33.03 ( $\text{CH}_3$ ), 58.0 (CH, **3h**), 57.9 (C, **4h**), 109.5 (CH, **3h**), 109.7 (CH, **4h**), 109.9 (C, **4h**), 111.0 (C, **3h**), 118.9 (CH), 119.6 (CH), 120.5 (CH), 120.7 (CH), 121.0 (CH), 121.4 (CH), 121.8 (CH), 122.1 (CH), 122.4 (CH), 122.9 (CH), 123.5 (CH), 125.0 (CH), 126.3 ( $2 \times \text{CH}$ ), 126.9 (CH), 127.0 (CH), 127.1 (CH), 127.5 (C),

128.0 (CH), 128.4 (CH), 128.7 (2 × CH), 128.9 (2 × CH), 129.7 (2 × CH), 130.2 (C), 131.1 (C), 132.1 (C), 134.7 (C), 136.8 (C), 137.2 (C), 139.1 (C), 139.4 (C) 141.7 (C), 143.0 (C), 146.5 (C), 147.9 (C), 151.5 (C), 156.2 (C) ppm.

**3-[1-(4-Chlorophenyl)-6-methoxy-3-methyl-1*H*-inden-2-yl]-1-methyl-1*H*-indole (3i)**

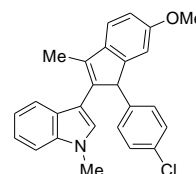

Following **GP3** from **1i** (200 mg, 0.5 mmol) as the starting 3-propargylindole a ca. >10:1 mixture of **3i:4i** was obtained. Indole derivatives **3i** and **3'i** were isolated by column chromatography on neutral alumina (hexane/Et<sub>2</sub>O, 20:1) in 88% overall yield. Data for **3i**: Yellow solid. M.p. 69 °C with decomposition. <sup>1</sup>H NMR (400 MHz, CDCl<sub>3</sub>): δ 2.26 (s, 3H, CH<sub>3</sub>C), 3.70 (s, 3H, XCH<sub>3</sub>), 3.78 (s, 3H, XCH<sub>3</sub>), 4.90 (s, 1H, ArCH), 6.70 (s, 1H, ArH), 6.78 (d, *J* = 2.4 Hz, 1H, ArH), 6.90 (dd, *J* = 2.4, 8.1 Hz, 1H, ArH), 7.01 (d, *J* = 8.5 Hz, 2H, ArH), 7.12 (d, *J* = 8.5 Hz, 2H, ArH), 7.10–7.16 (m, 1H, ArH), 7.21–7.30 (m, 3H, ArH), 7.63 (d, *J* = 8.1 Hz, 1H, ArH) ppm. <sup>13</sup>C NMR (75.4 MHz, CDCl<sub>3</sub>): δ 12.7 (CH<sub>3</sub>), 32.9 (CH<sub>3</sub>), 55.6 (CH<sub>3</sub>), 58.0 (CH), 109.4 (CH), 110.4 (CH), 111.1 (C), 112.2 (CH), 119.2 (CH), 119.4 (CH), 120.7 (CH), 121.7 (CH), 127.5 (C), 127.8 (CH), 128.7 (2 × CH), 129.7 (2 × CH), 132.1 (C), 134.4 (C), 136.8 (C), 137.0 (C), 139.5 (C), 139.6 (C), 149.6 (C), 158.2 (C) ppm. LRMS (70 eV, EI): *m/z* (%) 401 [(M+2)<sup>+</sup>, 32], 399 (M<sup>+</sup>, 100), 384 (29). HRMS calcd for C<sub>26</sub>H<sub>22</sub>ClNO, 399.1390; found, 399.1397.

**3-[3-(4-Chlorophenyl)-5-methoxy-1-methyl-1*H*-inden-2-yl]-1-methyl-1*H*-indole (3'i)**

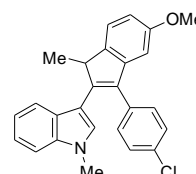

Data for **3'i**: Yellow solid. M.p. 197–199 °C. <sup>1</sup>H NMR (400 MHz, CDCl<sub>3</sub>): δ 1.3 (d, *J* = 7.5 Hz, 3H, CH<sub>3</sub>C), 3.72 (s, 3H, XCH<sub>3</sub>), 3.81 (s, 3H, XCH<sub>3</sub>), 4.15 (q, *J* = 7.5 Hz, 1H,

CHCH<sub>3</sub>), 6.77–6.84 (m, 3H, ArH), 7.03 (ddd, *J* = 1.0, 7.0, 8.0 Hz, 1H, ArH), 7.21 (ddd, *J* = 1.0, 7.0, 8.0 Hz, 1H, ArH), 7.24–7.45 (m, 7H, ArH) ppm. <sup>13</sup>C NMR (75.4 MHz, CDCl<sub>3</sub>): δ 17.5 (CH<sub>3</sub>), 33.1 (CH<sub>3</sub>), 46.0 (CH), 55.7 (CH<sub>3</sub>), 105.3 (CH), 109.4 (CH), 110.1 (CH), 110.5 (C), 119.9 (CH), 120.9 (CH), 121.9 (CH), 123.3 (CH), 126.8 (C), 128.9 (2 × CH), 129.4 (CH), 131.0 (2 × CH), 132.7 (C), 143.3 (C), 135.2 (C), 137.1 (C), 140.8 (C), 144.9 (C), 146.4 (C), 159.2 (C) ppm. LRMS (70 eV, EI): *m/z* (%) 401 [(M+2)<sup>+</sup>, 33] 399 (M<sup>+</sup>, 100), 386 (16), 384 (47), 341 (8), 152 (8). HRMS calcd for C<sub>26</sub>H<sub>22</sub>ClNO, 399.1390; found, 399.1385.

**1-methyl-3-(1-methyl-1-phenyl-1*H*-inden-2-yl)-2-phenyl-1*H*-indole (4k)**

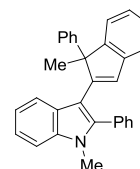

Following **GP3** from **1k** (165 mg, 0.4 mmol) as the starting 3-propargylindole a ca 1.6:1 of **3k:4k** was obtained. Indole derivative **4k** was isolated by column chromatography (hexane/Et<sub>2</sub>O, 20:1) as a yellow foam (56 mg, 34%). <sup>1</sup>H NMR (300 MHz, CDCl<sub>3</sub>): δ 1.54 (s, 3H, CH<sub>3</sub>C), 3.54 (s, 3H, NCH<sub>3</sub>), 6.70–6.75 (m, 2H, ArH), 6.81–7.07 (m, 7H, ArH), 7.10–7.36 (m, 10H, ArH) ppm. <sup>13</sup>C NMR (75.4 MHz, CDCl<sub>3</sub>): δ 22.3 (CH<sub>3</sub>), 31.1 (CH<sub>3</sub>), 60.2 (C), 109.1 (CH), 109.7 (C), 119.6 (CH), 120.8 (CH), 120.9 (CH), 121.6 (CH), 123.1 (CH), 125.3 (CH), 126.2 (CH), 126.7 (CH), 127.4 (C), 127.0 (2 × CH), 127.9 (CH), 127.96 (2 × CH), 128.04 (2 × CH), 130.8 (2 × CH), 131.7 (CH), 132.3 (C), 136.8 (C), 139.5 (C), 142.4 (C), 143.3 (C), 152.2 (C), 155.1 (C) ppm. LRMS (70 eV, EI): *m/z* (%) 411 (M<sup>+</sup>, 100), 396 (32), 318 (19).

### 3-(1-Ethyl-1-phenyl-1*H*-inden-2-yl)-1-methyl-1*H*-indole (4l)

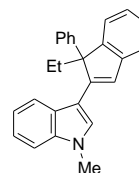

Following **GP3** from **1l** (174.7 mg, 0.5 mmol) as the starting 3-propargylindole a ca. 3:1 mixture of **3l:4l** was obtained. Indole derivative **4l** was isolated by column chromatography (hexane/Et<sub>2</sub>O, 50 :1) as a white solid (34.9 mg, 20%). M.p. 156–158 °C. <sup>1</sup>H NMR (300 MHz, CDCl<sub>3</sub>): δ 0.38 (t, *J* = 7.2 Hz, 3H, CH<sub>3</sub>CH<sub>2</sub>), 2.28–2.43 (m, 1H, CH<sub>3</sub>CHH), 2.56–2.72 (m, 1H, CH<sub>3</sub>CHH), 3.61 (s, 3H, NCH<sub>3</sub>), 6.44 (s, 1H, =CH), 6.97–7.07 (m, 2H, ArH), 7.17–7.39 (m, 10H, ArH), 7.42 (s, 1H, =CH), 8.12 (dd, *J* = 5.7, 2.4 Hz, 1H, ArH) ppm. <sup>13</sup>C NMR (75.4 MHz, CDCl<sub>3</sub>): δ 7.9 (CH<sub>3</sub>), 28.5 (CH<sub>2</sub>), 33.1 (CH<sub>3</sub>), 62.7 (C), 109.6 (CH), 110.4 (C), 120.2 (CH), 120.3 (CH), 121.0 (CH), 122.2 (CH), 122.3 (CH), 124.6 (CH), 125.3 (CH), 126.49 (2 × CH), 126.52 (CH), 126.8 (CH), 127.0 (C), 128.0 (CH), 128.7 (2 × CH), 137.1 (C), 144.4 (C), 144.7 (C), 148.0 (C), 152.4 (C) ppm. LRMS (70 eV, EI): *m/z* (%) 349 (M<sup>+</sup>, 74), 320 (100), 304 (18). HRMS calcd for C<sub>26</sub>H<sub>23</sub>N, 349.1830; found, 349.1827.

### 1-Methyl-3-(1-phenyl-1-propyl-1*H*-inden-2-yl)-1*H*-indole (4m)

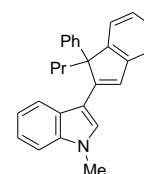

Following **GP3** from **1m** (140 mg, 0.38 mmol) as the starting 3-propargylindole a ca. 3:1 mixture of **3m:4m** was obtained. Indole derivative **4m** was isolated, slightly contaminated with an unknown impurity, by column chromatography (hexane/Et<sub>2</sub>O, 70:1) as a pale yellow solid (28 mg, 19%). M.p. 158–160 °C. <sup>1</sup>H NMR (300 MHz, CDCl<sub>3</sub>): δ 0.48–0.60 (m, 1H, CH<sub>3</sub>CHH) 0.66 (t, *J* = 7.2 Hz, 3H, CH<sub>3</sub>CH<sub>2</sub>), 0.86–0.96 (m, 1H, CH<sub>3</sub>CHH), 2.30 (td, *J* = 12.2, 4.2 Hz, 1H, CH<sub>3</sub>CH<sub>2</sub> CHH), 2.48 (td, *J* = 12.3, 4.2 Hz, 1H, CH<sub>3</sub>CH<sub>2</sub> CHH), 3.60 (s, 3H), 6.42 (s, 1H), 7.01–7.04 (m, 2H), 7.15–7.40

(m, 11H), 8.07–8.10 (m, 1H) ppm.  $^{13}\text{C}$  NMR (75.4 MHz,  $\text{CDCl}_3$ ):  $\delta$  14.8 ( $\text{CH}_3$ ), 16.5 ( $\text{CH}_2$ ), 17.5 ( $\text{CH}_2$ ), 33.2 ( $\text{CH}_3$ ), 62.3 (C), 109.7 (CH), 110.5 (C), 120.3 (CH), 120.4 (CH), 121.1 (CH), 122.2 (CH), 122.4 (CH), 124.7 (CH), 124.9 (CH), 126.5 (2  $\times$  CH), 126.6 (CH), 126.8 (CH), 127.1 (C), 128.2 (C), 128.8 (2  $\times$  CH), 137.2 (C), 144.5 (C), 144.5 (C), 148.6 (C), 153.0 (C) ppm. LRMS (70 eV, EI):  $m/z$  (%) 363 ( $\text{M}^+$ , 100), 321 (47), 320 (100), 304 (22), 160. HRMS calcd for  $\text{C}_{27}\text{H}_{25}\text{N}$ , 363.1987; found, 363.1988.

## References

1. Sanz, R.; Miguel, D.; Martínez, A.; Gohain, M.; García-García, P.; Fernández-Rodríguez, M. A.; Álvarez, E.; Rodríguez, F. *Eur. J. Org. Chem.* **2010**, 7027–7039. doi:10.1002/ejoc.201001055
2. Sanz, R.; Miguel, D.; Rodríguez, F. *Angew. Chem., Int. Ed.* **2008**, 47, 7354–7357. doi:10.1002/anie.200802660
3. Sanz, R.; Miguel, D.; Gohain, M.; García-García, P.; Fernández-Rodríguez, M. A.; González-Pérez, A.; Nieto-Faza, O.; de Lera, A. R.; Rodríguez, F. *Chem. Eur. J.* **2010**, 16, 9818–9828. doi:10.1002/chem.201001162
